# Supplementary material for: Effect of computerised cognitive training on cognitive outcomes in mild cognitive impairment: a systematic review and meta-analysis
Source: PubMed Central journal article supplement — BMJ Open. 2019 Aug 18;9(8):e027062. doi: 10.1136/bmjopen-2018-027062 (PMC6701629; doi:10.1136/bmjopen-2018-027062), 2019-08-18
Supplement: bmjopen-2018-027062.draft_revisions.pdf [file bmjopen-2018-027062.draft_revisions.pdf]

# BMJ Open

BMJ Open is committed to open peer review. As part of this commitment we make the peer review history of every article we publish publicly available.

When an article is published we post the peer reviewers' comments and the authors' responses online. We also post the versions of the paper that were used during peer review. These are the versions that the peer review comments apply to.

The versions of the paper that follow are the versions that were submitted during the peer review process. They are not the versions of record or the final published versions. They should not be cited or distributed as the published version of this manuscript.

BMJ Open is an open access journal and the full, final, typeset and author-corrected version of record of the manuscript is available on our site with no access controls, subscription charges or pay-per-view fees (<http://bmjopen.bmj.com>).

If you have any questions on BMJ Open's open peer review process please email [info.bmjopen@bmj.com](mailto:info.bmjopen@bmj.com)

# BMJ Open

## The efficacy of Computerized Cognitive Training on cognitive outcomes in Mild Cognitive Impairment: A Systematic Review and Meta-Analysis

|                               |                                                                                                                                                                                                                                                                                                                                                                                                                                                                                                                                                                                                                                                                                                                                                                                                                                                                                                                                                                                                                                                                                                                                                                                                                            |
|-------------------------------|----------------------------------------------------------------------------------------------------------------------------------------------------------------------------------------------------------------------------------------------------------------------------------------------------------------------------------------------------------------------------------------------------------------------------------------------------------------------------------------------------------------------------------------------------------------------------------------------------------------------------------------------------------------------------------------------------------------------------------------------------------------------------------------------------------------------------------------------------------------------------------------------------------------------------------------------------------------------------------------------------------------------------------------------------------------------------------------------------------------------------------------------------------------------------------------------------------------------------|
| Journal:                      | <i>BMJ Open</i>                                                                                                                                                                                                                                                                                                                                                                                                                                                                                                                                                                                                                                                                                                                                                                                                                                                                                                                                                                                                                                                                                                                                                                                                            |
| Manuscript ID                 | bmjopen-2018-027062                                                                                                                                                                                                                                                                                                                                                                                                                                                                                                                                                                                                                                                                                                                                                                                                                                                                                                                                                                                                                                                                                                                                                                                                        |
| Article Type:                 | Research                                                                                                                                                                                                                                                                                                                                                                                                                                                                                                                                                                                                                                                                                                                                                                                                                                                                                                                                                                                                                                                                                                                                                                                                                   |
| Date Submitted by the Author: | 05-Oct-2018                                                                                                                                                                                                                                                                                                                                                                                                                                                                                                                                                                                                                                                                                                                                                                                                                                                                                                                                                                                                                                                                                                                                                                                                                |
| Complete List of Authors:     | Zhang, Haifeng; University College London Division of Psychiatry; Peking University Institute of Mental Health (Sixth Hospital); National Clinical Research Center for Mental Disorders & Key Laboratory of Mental Health, Ministry of Health, Peking University; Beijing Dementia Key Lab<br>Huntley, Jonathan; University College London, Division of Psychiatry<br>Cahill, Jack; Institute of Psychiatry, Psychology and Neuroscience. King's College London<br>Holmes, Benjamin; University College London Division of Psychiatry<br>Bhome, Rohan; University College London, Division of Psychiatry<br>Gould, Rebecca; University College London Division of Psychiatry<br>Wang, Huali; Peking University Institute of Mental Health (Sixth Hospital); National Clinical Research Center for Mental Disorders & Key Laboratory of Mental Health, Ministry of Health, Peking University; Beijing Dementia Key Lab<br>Yu, Xin; Peking University Institute of Mental Health (Sixth Hospital); National Clinical Research Center for Mental Disorders & Key Laboratory of Mental Health, Ministry of Health, Peking University; Beijing Dementia Key Lab<br>Howard, R; University College London Division of Psychiatry, |
| Keywords:                     | Mild cognitive training (MCI), computerised, cognitive training, cognitive outcomes, meta-analysis                                                                                                                                                                                                                                                                                                                                                                                                                                                                                                                                                                                                                                                                                                                                                                                                                                                                                                                                                                                                                                                                                                                         |
|                               |                                                                                                                                                                                                                                                                                                                                                                                                                                                                                                                                                                                                                                                                                                                                                                                                                                                                                                                                                                                                                                                                                                                                                                                                                            |

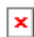

1  
2  
3  
4 1       **The efficacy of Computerized Cognitive Training on cognitive**  
5  
6 2       **outcomes in Mild Cognitive Impairment: A Systematic Review and**  
7  
8 3       **Meta-Analysis**  
9

10 4       Haifeng Zhang<sup>1,3</sup>, J. D. Huntley<sup>1</sup>, R. Bhome<sup>1</sup>, B. Holmes<sup>1</sup>, J.T. Cahill<sup>2</sup>, R.L. Gould<sup>2</sup>, Huali Wang<sup>3</sup>,  
11  
12  
13 5       Xin Yu<sup>3</sup> and R. J. Howard<sup>1</sup>  
14

15 6       1. Division of Psychiatry, University College London, London W1T 7NF, United Kingdom

16  
17 7       2. Institute of Psychiatry, Psychology and Neuroscience, King's College London, London  
18  
19 8       SE5 8AF, United Kingdom

20  
21  
22 9       3. Peking University Institute of Mental Health (Sixth Hospital); National Clinical  
23  
24 10       Research Center for Mental Disorders & Key Laboratory of Mental Health, Ministry  
25  
26 11       of Health, Peking University; Beijing Dementia Key Lab, Beijing 100191, China  
27  
28

29  
30 12       \* **Address correspondence**

31  
32 13       Dr. Huntley: [j.huntley@ucl.ac.uk](mailto:j.huntley@ucl.ac.uk)  
33

34  
35 14       6th Floor Maple House, 149 Tottenham Court Road, London W1T 7NF,  
36

37  
38 15       University College London, United Kingdom.  
39  
40  
41

42 17       **Running title:** A meta-analysis of computerised cognitive training on MCI  
43

44 18       **Key words:** Mild cognitive training (MCI), computerised, cognitive training, cognitive  
45  
46 19       outcomes, meta-analysis.  
47

48 20       **Word count:** 4050  
49  
50  
51  
52  
53  
54  
55  
56  
57  
58  
59  
60

1  
2  
3 22 **The efficacy of Computerized Cognitive Training on cognitive outcomes in**  
4  
5 23 **Mild Cognitive Impairment: A Systematic Review and Meta-Analysis**  
6  
7  
8  
9

10  
11 25 Haifeng Zhang<sup>1, 3</sup>, J. D. Huntley<sup>1</sup>, R. Bhome<sup>1</sup>, B. Holmes<sup>1</sup>, J.T. Cahill<sup>2</sup>, R.L. Gould<sup>2</sup>, Huali Wang<sup>3</sup>,  
12  
13 26 Xin Yu<sup>3</sup> and R. J. Howard<sup>1</sup>  
14

15 27 1. Division of Psychiatry, University College London, London W1T 7NF, United Kingdom

16  
17 28 2. Institute of Psychiatry, Psychology and Neuroscience, King's College London, London  
18  
19 29 SE5 8AF, United Kingdom

20  
21 30 3. Peking University Institute of Mental Health (Sixth Hospital); National Clinical  
22  
23 31 Research Center for Mental Disorders & Key Laboratory of Mental Health, Ministry  
24  
25 32 of Health, Peking University; Beijing Dementia Key Lab, Beijing 100191, China  
26  
27

28  
29 33 \* Address correspondence to Dr. Huntley: [j.huntley@ucl.ac.uk](mailto:j.huntley@ucl.ac.uk)  
30  
31

32 34

33  
34  
35 35 Running title: A meta-analysis of computerised cognitive training on MCI  
36  
37  
38  
39  
40  
41  
42  
43  
44  
45  
46  
47  
48  
49  
50  
51  
52  
53  
54  
55  
56  
57  
58  
59  
60

1  
2  
3 36 **Abstract:**  
4

5 37 **Objectives** To determine the efficacy of CCT in improving cognitive function for older adults with  
6  
7 38 MCI.  
8  
9

10 39 **Methods** Literature searches were performed using three online databases. Randomised controlled  
11  
12 40 trials (RCTs) comparing CCT with control conditions in those with MCI aged 55+ were included. Data  
13  
14 41 were extracted regarding participants, CCT and control interventions, trial quality and for all  
15  
16 42 reported cognitive outcomes. A random-effects meta-analysis was conducted to estimate overall  
17  
18 43 efficacy on cognitive function.  
19  
20

21 44 **Results** 18 studies met the inclusion criteria and were included in the analyses, involving 690  
22  
23 45 participants. Meta-analysis revealed small to moderate positive treatment effects compared to  
24  
25 46 controls intervention in 4 domains as follows: Global Cognitive Function ( $g = 0.23$ , 95% CI = 0.03,  
26  
27 47 0.44), Memory ( $g = 0.30$ , 95% CI = 0.11, 0.50), Working Memory ( $g = 0.39$ , 95% CI = 0.12, 0.66) and  
28  
29 48 Executive function ( $g = 0.20$ , 95% CI = -0.03, 0.43). Statistical significance was reached in all domains  
30  
31 49 apart from executive function.  
32  
33

34 50 **Conclusion** This meta-analysis provides evidence that CCT improves cognitive function in older  
35  
36 51 people with MCI. However, the long-term transfer of these improvements and potential to reduce  
37  
38 52 dementia prevalence remains unknown. Various methodological issues such as heterogeneity in  
39  
40 53 outcome measures, interventions and MCI symptoms and lack of intention-to-treat (ITT) analyses  
41  
42 54 limit the quality of the literature and represent areas for future research to improve in the future.  
43  
44  
45

46 55  
47  
48  
49  
50  
51  
52  
53  
54  
55  
56  
57  
58  
59  
60

1  
2  
3 56 **Strengths and limitations of this study**  
4

- 5  
6 57 1. This is a comprehensive systematic review and meta-analysis evaluating the evidence for the  
7  
8 58 efficacy of computerised cognitive training in old adults with mild cognitive impairment on  
9  
10 59 cognitive outcomes.  
11  
12 60 2. Data for four main cognitive domains were extracted from individual studies (global cognitive  
13  
14 61 function, episodic memory, working memory and executive function) and where appropriate  
15  
16 62 composite measures were calculated for meta-analyses.  
17  
18 63 3. The studies included in the systematic review are generally of a moderate quality and several  
19  
20 64 methodological issues, particularly a lack of follow up data makes it impossible to draw  
21  
22 65 conclusions regarding long term effects or impact on prevalence of dementia.  
23  
24  
25  
26  
27  
28  
29 67

## 68 INTRODUCTION

69 There are currently estimated to be over 46 million people worldwide living with dementia. This  
70 number is expected to grow to approximately 131.5 million by 2050.<sup>1</sup> There is therefore an urgent  
71 need to develop therapeutic treatments that may delay or prevent dementia in population groups  
72 considered 'at risk'.<sup>2</sup> Interventions that delay the onset of AD by an average of two years would  
73 decrease the worldwide prevalence rate by 22.8 million cases,<sup>3</sup> which in turn, would ease the huge  
74 burden placed on individuals, families and society. For these reasons, evidence-based interventions  
75 that reduce the risk of dementia are urgently required.

76 Mild Cognitive Impairment (MCI) refers to an intermediate stage between normal age-related  
77 cognitive decline (ARCD) and dementia.<sup>4</sup> Although many older adults experience a degree of  
78 deterioration in cognitive performance, MCI is described as a greater than expected cognitive  
79 decline for an individual's age and education, but without notable interference in everyday  
80 functioning.<sup>5</sup> Within the older adult population, the estimated prevalence rate of MCI ranges from  
81 15-20%.<sup>6</sup> Although MCI can present with a variety of symptoms, when memory loss is the  
82 predominant symptom it is termed "amnesic MCI" and is frequently seen as a prodromal stage of  
83 Alzheimer's disease.<sup>6</sup> When individuals have impairments in domains other than memory it is  
84 classified as non-amnesic single- or multiple-domain MCI and these individuals are believed to be  
85 more likely to convert to other types of dementia.<sup>6</sup>

86 The lack of therapeutic benefit or delay in progression from MCI to AD with pharmacological  
87 interventions has meant that the focus has shifted towards non-pharmacological interventions.<sup>7</sup>

88 Cognitive remediation is the term used for interventions designed to mediate cognitive decline and  
89 can be typically identified as involving one of three different approaches: cognitive stimulation (CS),  
90 cognitive rehabilitation (CR) and cognitive training (CT). Interventions based on CS and CR are more  
91 focused on individuals with established dementia, often with the aim of overcoming specific  
92 difficulties with daily living and improving general quality of life. In comparison, CT can be used for

1  
2  
3 93 subjects without significant cognitive or functional difficulties, and is therefore well suited for  
4  
5 94 individuals with MCI.

6  
7  
8 95 CT refers to interventions that aim to improve cognitive domains through repeated practice on  
9  
10 96 theoretically driven skills and strategies.<sup>8</sup> Each CT exercise aims to target one or two specific  
11  
12 97 domains in an adaptive manner with a possibility of transfer effects whereby performance in other  
13  
14 98 untrained cognitive domains is also improved<sup>9</sup>.

15  
16 99 Computerised cognitive training (CCT) utilises computers for the delivery of the intervention and  
17  
18 100 differs from traditional CT, which usually incorporates face-to-face contact with a professional and  
19  
20 101 paper-and-pencil paradigms.<sup>8</sup> CCT has several advantages including cost-effectiveness, increased  
21  
22 102 accessibility and ability to customise the content and difficulty of the training.<sup>10-12</sup> Research involving  
23  
24 103 older adults has found that CCT programs are associated with high satisfaction levels, and that they  
25  
26 104 are also a feasible option for individuals with MCI, with equal or better adherence rates when  
27  
28 105 compared to traditional CT.<sup>10 13</sup> In addition, evidence suggests that studies utilising CCT show a  
29  
30 106 pattern of stronger effect sizes and enhanced generalisation of benefits compared to traditional  
31  
32 107 strategy training in MCI.<sup>14</sup> A previous meta-analysis found that CT is not effective in people with  
33  
34 108 established dementia.<sup>15</sup> However, there is growing interest as to whether CCT has the potential to  
35  
36 109 prevent or slow the progression from MCI to dementia particularly given the association between  
37  
38 110 higher participation in mental activity and reduced dementia risk.<sup>16</sup>

39  
40  
41 111 Studies investigating the effectiveness of CT in improving cognitive performance in people with MCI  
42  
43 112 have demonstrated small to moderate improvement but existing research suffers from  
44  
45 113 methodological concerns and limitations.<sup>14 17-19</sup> CT research in individuals with MCI has been  
46  
47 114 criticised for the failure to include an appropriate control group,<sup>20-22</sup> use of subsets of participants  
48  
49 115 from previous studies,<sup>23</sup> and pooling of MCI data with that from non-impaired adults<sup>24</sup> as well as  
50  
51 116 those with probable AD.<sup>25-27</sup> Another issue raised in treatment studies has been the use of  
52  
53 117 ecologically valid outcome measures. For example, the inclusion of functional outcome measures is  
54  
55 118 important to monitor progression from MCI to dementia but given that individuals with MCI are, by



1  
2  
3 119 definition, not significantly impaired in functioning, it is a challenge to measure the functional effects  
4  
5 120 of the intervention.<sup>17</sup>  
6  
7  
8 121  
9  
10 122 CCT is far from a single construct and factors such as the content, platform, context and dose of  
11  
12 123 training may differ.<sup>28</sup> Unfortunately, despite increasing scientific scrutiny, there is a limited  
13  
14 124 understanding as to which, if any, dimensions are associated with cognitive benefit. Critical analysis  
15  
16 125 of research using CCT for MCI should reveal insight into any effective components of CCT, however,  
17  
18 126 it is important to establish the overall efficacy of CCT in individuals with MCI.  
19  
20  
21 127 Systematic reviews and meta-analysis of cognitive intervention in MCI have reported mixed results,<sup>19</sup>  
22  
23 128 <sup>29-34</sup> and when exploring the efficacy of cognitive training in MCI have largely not distinguished  
24  
25 129 between studies evaluating computerised and non-computerised training. This makes it difficult to  
26  
27 130 draw conclusions specifically on the efficacy of CCT in MCI. One previous meta-analysis by Hill et al  
28  
29 131 specially explored the effectiveness of CCT in MCI on cognition and behavioural outcomes,<sup>32</sup>  
30  
31 132 however, further relevant studies have been published subsequently.<sup>32 35-37</sup>  
32  
33  
34 133 This paper investigates the efficacy of CCT on improving cognitive outcomes in individuals diagnosed  
35  
36 134 with MCI using random effects meta-analyses. To address some of the problems identified in the  
37  
38 135 literature, only peer-reviewed RCTs were selected and all cognitive outcome measures were  
39  
40 136 extracted for analysis. Variables that may moderate the efficacy of CCT, such as the type of  
41  
42 137 programme or dose of the intervention, were reviewed. The purpose of the current review was to: a)  
43  
44 138 evaluate the efficacy of CCT in older adults with MCI on cognitive outcomes; b) evaluate the content  
45  
46 139 and methodological quality of the intervention studies; and c) suggest future directions in CCT  
47  
48 140 research in this group based on findings.  
49  
50  
51  
52 141

## 142 **MATERIALS AND METHODS**

### 143 **Search strategy and selection criteria**

144 A literature search was completed during January 2018 of three online literature databases and trial  
145 registers: Embase, Web of Science and Cochrane library. The search terms are shown in  
146 supplementary table 1. Previous meta-analyses and systematic reviews of cognitive interventions in  
147 MCI were also searched. Furthermore, reference lists of included studies were manually scanned for  
148 additional relevant papers.

### 149 **Inclusion and exclusion criteria**

150 Types of studies: Published, peer-reviewed studies with a RCT design investigating the use of CCT  
151 interventions in older people with MCI were considered for inclusion. Studies were included if  
152 sufficient data were available for calculation of effect sizes in each treatment arm (unavailable  
153 information was requested from authors and included if obtained). The date of publication was not  
154 limited, but only studies published in English were included.

155 Participants: Inclusion criteria were a mean age of participants greater than 55 years, a diagnosis of  
156 MCI using core criteria according to Petersen<sup>4</sup> and no other psychiatric diagnosis or neurological  
157 disorder. The number of participants in each arm needed to be at least five. Studies with  
158 non-impaired older people or those with probable AD were excluded unless separate data for  
159 participants with MCI was provided.

160 Types of interventions: Studies were included if they compared any CCT intervention, administered  
161 on a personal computer or gaming console, to an active or non-active control. Computerised training  
162 had to represent the primary intervention, not simply one of multiple broader non-computerised  
163 cognitive interventions, in order to be included. Active controls were classified as interventions that  
164 controlled for non-specific therapeutic effects, whereas non-active control groups included waiting  
165 list conditions, treatment as usual (TAU) or a non-matched minimal intervention. Each study was

1  
2  
3 166 independently screened, selected for inclusion and its data extracted by independent researchers.

4  
5 167 Any disagreements were resolved through discussion with another author.

6  
7  
8 168 Types of outcome measures: All primary and secondary outcomes that measured objective cognitive  
9  
10 169 performance were included, and were categorised into 4 domains: episodic memory (referred to as  
11  
12 170 memory), working memory, executive function, and global cognitive functioning.

#### 13 14 15 171 **Risk of bias assessment**

16  
17 172 The Cochrane Collaboration Risk of Bias tool was used to assess study methodological quality<sup>38</sup>. Risk  
18  
19 173 of bias was assessed in multiple domains: sequence generation, allocation concealment, blinding of  
20  
21 174 participants and investigators, incomplete outcome data and selective reporting of outcomes. In  
22  
23 175 each of these categories, the methodological quality of each assessed domain was rated as 'low risk',  
24  
25 176 'unclear' or 'high risk'. Studies were excluded if unsure or high risk in all assessed domains.

#### 26 27 28 177 **Statistical analysis**

29  
30  
31 178 Intervention and control groups' post-intervention score were compared using Review manager  
32  
33 179 (RevMan) software version 5.3. The programme uses Hedges' adjusted  $g$ <sup>39</sup> to calculate a  
34  
35 180 standardised mean difference (SMD) which is adjusted for small sample bias. Pooling of standardized  
36  
37 181 mean Hedges'  $g$  estimates of  $<0.30$ ,  $\geq 0.30$  and  $< 0.60$ , and  $\geq 0.60$  were considered small, moderate,  
38  
39 182 and large, respectively. Meta-analyses were performed where three or more studies investigated a  
40  
41 183 comparable intervention and outcome using a random effects model. Heterogeneity was quantified  
42  
43 184 using the  $I^2$  statistic, considered as low, moderate, or large when at 25%, 50%, or 75%, respectively.<sup>40</sup>

44  
45  
46 185 Where a study reported multiple outcome measures for one cognitive domain (e.g., within memory  
47  
48 186 function), a composite measure was calculated to provide a single quantitative measure for  
49  
50 187 meta-analysis.<sup>41</sup> Publication bias was examined using funnel plots. We also performed subgroup  
51  
52 188 analysis, for example we compared the effectiveness of single and multi-domain training.  
53  
54 189 Furthermore, we subgrouped studies with the training dose less than 10 hours and more than 30  
55  
56  
57  
58  
59  
60

1  
2  
3 190 hours to see if there is a dose-response correlation. Sensitivity analyses was performed to identify  
4  
5 191 potential sources of heterogeneity. Further details of statistical methods are found in the  
6  
7 192 supplementary material (see supplementary appendix 1).  
8  
9

10 193 **Patient and public involvement**

11  
12 194 There was no direct patient or public involvement in this review.  
13  
14

15 195  
16  
17  
18  
19  
20  
21  
22  
23  
24  
25  
26  
27  
28  
29  
30  
31  
32  
33  
34  
35  
36  
37  
38  
39  
40  
41  
42  
43  
44  
45  
46  
47  
48  
49  
50  
51  
52  
53  
54  
55  
56  
57  
58  
59  
60

196

**RESULTS****Description of studies**

The PRISMA checklist was used to guide reporting of results.<sup>42</sup>

Following the initial literature review a total of 691 studies were found. Of these 673 were excluded and 18 studies met inclusion criteria. Figure 1 presents a flowchart of study selection. The total number of participants included was 690 and the summary characteristics of each study are presented in table 1. Sample sizes ranged from 12 to 106, and dropout rates ranged from 0% to 32%.

One study was excluded from the meta-analysis because of suspected inclusion of participants with probable AD based on the reported average Mini-Mental State Examination (MMSE) score.<sup>43</sup>

Another two studies were excluded from the meta-analysis as post-intervention cognitive data could not be obtained.<sup>44 45</sup>

13 studies reported outcomes assessing memory, 5 studies reported outcomes assessing working memory, 11 studies reported outcomes assessing executive function, and 11 studies reported global cognitive functioning outcomes (see table 2.).

**Quality of studies**

The quality of each study was evaluated in regard to certain methodological aspects and summarised in supplementary figure 1. 11 of the 18 studies did not report blinding of participants.

**Participant characteristics**

The total amount of participants from all studies included was 690 (CCT: n=351, mean group size: n=20, control: n=339, mean group size: n=19). The average age of participants in both conditions was 73.4 years. 52.5% of all participants were male. The disparity and lack of reporting of the ratio of participants' years of education precluded mean calculations, although the available data suggests

1  
2  
3 219 most participants had at least secondary school education. The pooled average baseline score for  
4  
5 220 the MMSE was 26.9 in both groups, although the range of scores indicated heterogeneity within  
6  
7 221 participants.  
8  
9

### 10 222 **Cognitive Training Interventions**

11  
12 223 Interventions were mostly delivered on a personal computer (PC), using commercially available or  
13  
14 224 purpose built CT packages, with two studies utilising a video game on a games console.<sup>13 37</sup> All  
15  
16 225 interventions were specifically designed to improve various aspects of cognition. The most common  
17  
18 226 type of intervention used was multi-domain (11/18 studies), where the programme targeted two or  
19  
20 227 more cognitive domains. In the seven single domain intervention studies, three evaluated memory  
21  
22 228 training and executive function training while one used working memory training. The dose and  
23  
24 229 duration of the CT intervention was variable, with the total length of training ranging from 4 hours<sup>46</sup>  
25  
26 230 to 80 hours<sup>47</sup> and the duration of training from 2 weeks<sup>48</sup> to 26 weeks.<sup>47</sup>  
27  
28  
29

### 30 231 **Outcome Measures**

31  
32  
33 232 Supplementary Table 2 summarises the 60 different cognitive outcome measures used by studies  
34  
35 233 included in the meta-analyses. A considerable variability in measures reported was also noted; only  
36  
37 234 three outcome measures were reported three or more times; seven studies used the MMSE as a  
38  
39 235 measure of global cognition, three studies used Paired-associates learning (PAL) to measure memory  
40  
41 236 and in four studies used the Trail Making Test (TMT) as a measure of executive function.  
42  
43

### 44 237 **Meta-analysis of specific outcomes**

45  
46  
47 238 Separate meta-analyses were conducted on four different cognitive domains. The most commonly  
48  
49 239 tested domains were memory, with thirteen studies exploring this domain. The results of the  
50  
51 240 meta-analyses are presented in table 2.  
52  
53

54 241 Global Cognition function  
55  
56  
57  
58  
59  
60

1  
2  
3 242 Overall, there was a significant benefit of CCT on global cognition compared to the control group.  
4  
5 243 The meta-analysis revealed a small but statistically significant pooled effect size of 0.23 (95% CI [0.03,  
6  
7 244 0.44],  $z = 2.22$ ,  $p = 0.03$ ) with low heterogeneity between studies ( $I^2 = 6\%$ ) (see figure 2.). The funnel  
8  
9 245 plot did not reveal significant asymmetry (see supplementary figure 2.). The effect size across  
10  
11 246 active-controlled trials ( $n=7$ ,  $g=0.23$ , 95% CI [-0.05, 0.51],  $I^2=27\%$ ) was smaller than that of trials with  
12  
13 247 non-active control groups ( $n=4$ ,  $g=0.31$ , 95% CI [-0.06, 0.68],  $I^2=0\%$ ) (see supplementary figure 3-4.),  
14  
15 248 but was non-significant in both analyses.  
16

249

## 250 Memory

251 The pooled effect size of CCT on memory outcomes, when compared with control conditions, was  
252 moderate and statistically significant ( $g = 0.30$ , 95% CI = [0.11, 0.50],  $z = 3.03$ ,  $p = 0.002$ ), with  
253 moderate heterogeneity between studies ( $I^2 = 46\%$ ) (see figure 3.). The funnel plot did not reveal  
254 significant asymmetry (see supplementary figure 5.). The effect size across active-controlled trials  
255 ( $n=8$ ,  $g=0.36$ , 95% CI [0.11, 0.61],  $I^2=52\%$ ) was statistically significant and was larger than that of  
256 trials with passive control groups ( $n=5$ ,  $g=0.20$ , 95% CI [-0.14, 0.54],  $I^2=43\%$ ) (see supplementary  
257 figure 6-7.). However, there was moderate heterogeneity between studies in both analyses.

258 Due to the moderate heterogeneity between studies, a sensitivity analysis was also conducted, in  
259 which one study at a time was removed and the others analysed to estimate whether the results  
260 could have been markedly affected by a single study. The combined Hedges'  $g$  were consistent and  
261 without apparent fluctuation, with a range from 0.23 [0.07, 0.39] to 0.35[0.15, 0.55].  
262

263

## 264 Working Memory

265 The meta-analysis revealed a statistically significant moderate effect size of 0.39 in favour of CCT  
266 compared with controls (95% CI [0.12, 0.66],  $z = 2.85$ ,  $p = 0.004$ ) with low heterogeneity between  
studies ( $I^2 = 0\%$ ) (see figure 3.). The funnel plot did not reveal significant asymmetry (see

1  
2  
3 267 supplementary figure 5.). Due to there being fewer than three non-active we did not compare the  
4  
5 268 effect size between active-controlled trials and non-active trials.

6  
7 269

8  
9 270 Executive function

10  
11 271 The overall effect of CCT on executive function compared with control conditions was small and  
12  
13 272 non-significant. The meta-analysis revealed a pooled effect size of 0.20 (95% CI [-0.03, 0.43],  $z = 1.74$ ,  
14  
15 273  $p = 0.08$ ) with high heterogeneity between studies ( $I^2 = 51%$ ) (see figure 3.). The funnel plot did not  
16  
17 274 reveal significant asymmetry (see supplementary figure 5.). The effect size across active-controlled  
18  
19 275 trials ( $n=7$ ,  $g=0.13$ , 95% CI [-0.08, 0.35],  $I^2=20%$ ) was smaller than for the non-active control groups  
20  
21 276 ( $n=4$ ,  $g=0.32$ , 95% CI [-0.23, 0.87],  $I^2=74%$ ), but was non-significant in both analyses (see  
22  
23 277 supplementary figure 8-9.).

24  
25  
26 278 Considering the large heterogeneity between studies ( $I^2 = 51%$ ), a sensitivity analysis was also  
27  
28 279 conducted as described above. The combined Hedges'  $g$  were consistent and without apparent  
29  
30 280 fluctuation, with a range from 0.12 [-0.05, 0.28] to 0.35 [0.03, 0.48].

31  
32 281

33  
34 282 Subgroup analysis

35  
36 283 A priori, we stipulated that meta-analysis would only be performed if three studies report outcomes  
37  
38 284 in the same cognitive domain and so subgroup analysis could only compare single and multi-domain  
39  
40 285 memory training. Similarly, only global cognition could be used for subgroup analysis to compare the  
41  
42 286 training interventions less than ten hours and more than thirty hours. Our subgroup analyses  
43  
44 287 suggested that multi-domain CCT remains more efficacious than single-domain CCT as the former  
45  
46 288 had a significant effect ( $g = 0.30$ , 95% CI (0.08, 0.53)) while the later was non-significant ( $g = 0.31$ ,  
47  
48 289 95% CI (-0.19, 0.81)) (see supplementary figure 10-11). There is also no clear evidence for a  
49  
50 290 dose-response relationship. Our subgroup analysis found that studies that provided more than 30  
51  
52 291 hours of CCT had a smaller overall effect on global cognitive function ( $g = 0.20$ , 95% CI (-0.31, 0.71))  
53  
54 292 compared to studies providing less than 10 hours of CCT ( $g = 0.30$ , 95% CI (-0.01, 0.61) (see  
55  
56  
57  
58  
59  
60



1  
2  
3  
4  
5  
6  
7  
8  
9  
10  
11  
12  
13  
14  
15  
16  
17  
18  
19  
20  
21  
22  
23  
24  
25  
26  
27  
28  
29  
30  
31  
32  
33  
34  
35  
36  
37  
38  
39  
40  
41  
42  
43  
44  
45  
46  
47  
48  
49  
50  
51  
52  
53  
54  
55  
56  
57  
58  
59  
60

293 supplementary figure 12-13). The subgroup analyses need to be interpreted with caution due to the  
294 small number of studies and heterogeneity, however, they illustrate the lack of clear factors that are  
295 associated with efficacy.

For peer review only

## 296 **DISCUSSION**

### 297 **Main findings**

298 Based on results from 18 RCTs, it is likely that CCT is a viable intervention for improving cognition in  
299 older people with MCI. There were small to moderate positive effect sizes found in all domains, with  
300 statistical significance reached for global cognitive function ( $g=0.23$ , 95% CI = [0.03, 0.44]), memory  
301 ( $g=0.30$ , 95% CI=[0.11, 0.50]) and working memory ( $g=0.39$ , 95% CI=[0.12, 0.66]), but not executive  
302 function ( $g=0.20$ , 95% CI=[-0.03, 0.43]). The largest effect sizes were found for working memory and  
303 memory (although statistically significant heterogeneity was found for the latter domain). This is  
304 unsurprising given its central focus in most interventions and promising given this is the primary  
305 complaint in most cases of MCI.

306 The findings from our meta-analyses are largely in keeping with the results of previous research that  
307 has examined CCT<sup>32</sup> or combined computerised and non-computerised studies and demonstrated  
308 positive effect sizes for global cognition, memory, working memory and executive function<sup>33</sup>. The  
309 current meta-analysis employed strict eligibility criteria to overcome the methodological issues  
310 reported in the literature<sup>49 50</sup> such as inappropriate control groups and CCT being combined with  
311 other interventions. The combination of an overall large sample size (N=690) and stringent eligibility  
312 criteria make this meta-analysis a useful contribution to the growing evidence for the efficacy of CCT  
313 in MCI. Nevertheless, various methodological issues were identified that limit the ability to make  
314 recommendations for the optimal format, frequency or intensity of CCT. Further, the lack of  
315 longitudinal studies make it unclear whether observed post-intervention benefits contribute in any  
316 way to the goal of delaying or preventing the progression from MCI to dementia.

### 317 **Validity of observations and limitations**

### 318 **Sources of bias**

1  
2  
3 319 Several methodological issues were identified. Studies were rarely double-blinded, and whilst it may  
4  
5 320 be considered impractical to blind therapists and participants given the nature of the intervention,  
6  
7 321 this nevertheless introduces the risk of expectation bias and exaggerated results. In addition, data  
8  
9 322 concerning dropouts were rarely included in the analyses and ITT analysis was only used in two  
10  
11 323 studies.<sup>46 51</sup> Whilst most of the remaining studies reported no significant differences at baseline for  
12  
13 324 those who dropped out, these differences may have only become apparent post-intervention, and  
14  
15 325 baseline differences may have been more obvious with the large number of participants in the  
16  
17 326 meta-analysis. Thus, the absence of ITT may have introduced an attrition bias.

19  
20 327 Further bias may have arisen due to the decision in this study not to differentiate between amnesic  
21  
22 328 and non-amnesic forms of MCI. This classification is an example of the heterogeneity of MCI  
23  
24 329 symptoms. This heterogeneity is supported in descriptions by Petersen<sup>52</sup> and in the results of a study  
25  
26 330 revealing MCI as a highly nuanced and complex clinical entity.<sup>53</sup> This may lead to considerably  
27  
28 331 different intervention effects between participants and render it difficult to evaluate the efficacy of  
29  
30 332 the cognitive intervention and the generalisability of the current results.

31  
32  
33 333 This meta-analysis calculated composite effect sizes when multiple outcome measures were  
34  
35 334 provided for the same domain in each study. Whilst this method maximises the amount of data  
36  
37 335 drawn from the reviewed studies, it also has certain limitations. Firstly, this approach necessitated  
38  
39 336 an arbitrary measure of correlation between outcome measures, in this case set at 0.5. This may be  
40  
41 337 inaccurate, with outcome measures being more or less heterogeneous. Unfortunately, data on  
42  
43 338 composite heterogeneity was not available, however, choosing between outcome measures to  
44  
45 339 decide which best represents a particular domain would have posed a significant risk of selection  
46  
47 340 bias. This partly stems from the fact that 'gold standard' tests for the different cognitive domains  
48  
49 341 have not been identified.

50  
51  
52  
53 342 The literature suggests multiple factors may influence the efficacy of cognitive interventions.<sup>54</sup> An  
54  
55 343 aim of the current analysis was to provide insight regarding CCT design choices and training

1  
2  
3 344 outcomes to inform decisions on interventions to use both clinically and in future studies. Due to the  
4  
5 345 limited number of studies and heterogeneity of interventions and outcome measures, it is difficult to  
6  
7 346 make clear recommendations for the optimal form of CCT.  
8  
9

10 347 This meta-analysis has demonstrated efficacy of CCT in MCI patients for a very specific outcome:  
11  
12 348 performance on a neuropsychological test immediately post-intervention. Whilst promising, this is  
13  
14 349 far removed from the goal of slowing progression to or preventing dementia in MCI patients. There  
15  
16 350 was a lack of follow-up data, with only three studies<sup>47 55 56</sup> including long-term outcome measures, so  
17  
18 351 no conclusions can be drawn regarding the longevity of the small to moderate effects or the transfer  
19  
20 352 of immediate effects. In addition, benefits on neuropsychological testing may not translate to  
21  
22 353 clinically meaningful benefits in everyday function. Barnett and Ceci<sup>57</sup> describe the immediate  
23  
24 354 outcomes measured here as 'near transfer' and the long-term transfer to untrained cognitive  
25  
26 355 abilities as 'far transfer'. If there is any possibility of dementia being prevented or delayed using CCT  
27  
28 356 then 'far transfer' of some sort is likely necessary. A review by Zelinski<sup>58</sup> outlines how 'far transfer'  
29  
30 357 from cognitive training has been observed in aging population, though this is not specific to CCT or  
31  
32 358 MCI. Demonstration of 'far transfer' as a result of cognitive training in healthy adults is very rare and  
33  
34 359 there is increasing evidence that even 'near transfer' is difficult to demonstrate convincingly.<sup>59</sup> More  
35  
36 360 research into long-term transfer effects of CCT in patients with MCI is vital in determining its  
37  
38 361 potential to reduce the dementia burden.  
39  
40

#### 41 42 362 **Suggestions for future research** 43

44 363 The discussion highlights factors limiting the reliability and transferability of the results of the  
45  
46 364 meta-analysis. These limitations may be potentially overcome by more RCTs examining long-term  
47  
48 365 cognitive outcomes to assess transfer of CCT to everyday life and provide more insight on whether  
49  
50 366 CCT can influence progression to dementia. It is feasible to conduct large and longitudinal studies of  
51  
52 367 CCT, as it can be delivered online and therefore be easily and widely available. The standardization  
53  
54  
55  
56  
57  
58  
59

1  
2  
3 368 of outcome measures between RCTs would also avoid problems associated with heterogeneity and  
4  
5 369 overall higher methodological quality of RCTs would reduce bias.  
6  
7

8 370 **Conclusion**

9  
10 371 This meta-analysis has demonstrated support for the hypothesis that CCT improves cognitive  
11  
12 372 function in older people with MCI. However, the long-term transfer of these improvements and  
13  
14 373 relevance to reducing dementia prevalence remains unknown. Various methodological issues such  
15  
16 374 as heterogeneity in outcome measures, interventions and MCI symptoms and lack of ITT analyses  
17  
18 375 are significant limitations of the literature. Long-term outcomes are the next priority for CCT in MCI  
19  
20 376 patients to further explore its efficacy with respect to influencing dementia progression.  
21  
22  
23  
24  
25  
26  
27  
28  
29  
30  
31  
32  
33  
34  
35  
36  
37  
38  
39  
40  
41  
42  
43  
44  
45  
46  
47  
48  
49  
50  
51  
52  
53  
54  
55  
56  
57  
58  
59  
60

1  
2  
3 378 **Contributors**  
4

5 379 HZ, RB, JDH, RG, HW, XY and RJH all contributed to the conception and design of the review. HZ, BH,  
6  
7 380 CJT, JDH read and screened abstracts and titles of potentially relevant studies. HZ, RB, and JDH read  
8  
9 381 the retained papers and were responsible for extracting data and rating their quality independently.  
10  
11 382 HZ drafted the paper with all the authors critically reviewing it and suggesting amendments prior to  
12  
13 383 submission. All the authors had access to all the data in the study and can take responsibility for the  
14  
15 384 integrity of the reported findings.  
16  
17

18  
19 385 **Funding**  
20

21 386 Haifeng Zhang is supported by the China Scholarship Council (CSC) (No. 201706010329) to be a  
22  
23 387 visiting Ph.D. student at University College London, UK. RB is supported by a NIHR Academic Clinical  
24  
25 388 Fellowship. JH and RH are supported by the NIHR UCLH BRC.  
26  
27

28 389 **Competing interests**  
29

30  
31 390 None declared.  
32  
33

34 391 **Patient consent**  
35

36 392 Not required.  
37  
38

39 393 **Provenance and peer review**  
40

41  
42 394 Not commissioned; externally peer reviewed.  
43  
44

45 395 **Data sharing statement**  
46

47 396 Details of excluded papers are available from the first author on request.  
48  
49

50 397  
51

52  
53 398  
54

55  
56 399  
57  
58  
59  
60

400 **REFERENCES**

- 401 1. Alzheimer's Disease International. World Alzheimer Report 2015. 2015
- 402 2. Huckans M, Hutson L, Twamley E, et al. Efficacy of cognitive rehabilitation therapies for mild  
403 cognitive impairment (MCI) in older adults: working toward a theoretical model and  
404 evidence-based interventions. *Neuropsychol Rev* 2013;23(1):63-80. doi:  
405 10.1007/s11065-013-9230-9
- 406 3. Brookmeyer R, Johnson E, Ziegler-Graham K, et al. Forecasting the global burden of Alzheimer's  
407 disease. *Alzheimer's & dementia : the journal of the Alzheimer's Association*  
408 2007;3(3):186-91. doi: 10.1016/j.jalz.2007.04.381
- 409 4. Petersen RC, Smith GE, Waring SC, et al. Mild cognitive impairment: clinical characterization and  
410 outcome. *Archives of neurology* 1999;56(3):303-8.
- 411 5. Gauthier S, Reisberg B, Zaudig M, et al. Mild cognitive impairment. *Lancet*  
412 2006;367(9518):1262-70. doi: 10.1016/s0140-6736(06)68542-5
- 413 6. Petersen RC. Mild Cognitive Impairment. *Continuum (Minneapolis Minn)* 2016;22(2  
414 Dementia):404-18. doi: 10.1212/CON.0000000000000313
- 415 7. Karakaya T, Fusser F, Schroder J, et al. Pharmacological Treatment of Mild Cognitive Impairment  
416 as a Prodromal Syndrome of Alzheimer's Disease. *Curr Neuropharmacol* 2013;11(1):102-8.  
417 doi: 10.2174/157015913804999487
- 418 8. Gates N, Valenzuela M. Cognitive Exercise and Its Role in Cognitive Function in Older Adults.  
419 *Current Psychiatry Reports* 2010;12(1):20-27. doi: 10.1007/s11920-009-0085-y
- 420 9. Ball K, Berch DB, Helmers KF, et al. Effects of cognitive training interventions with older adults: a  
421 randomized controlled trial. *Jama* 2002;288(18):2271-81.
- 422 10. Kueider AM, Parisi JM, Gross AL, et al. Computerized cognitive training with older adults: a  
423 systematic review. *PloS one* 2012;7(7):e40588. doi: 10.1371/journal.pone.0040588
- 424 11. Jak AJ, Seelye AM, Jurick SM. Crosswords to computers: a critical review of popular approaches  
425 to cognitive enhancement. *Neuropsychology review* 2013;23(1):13-26.

- 1  
2  
3 426 12. Owen AM, Hampshire A, Grahn JA, et al. Putting brain training to the test. *Nature*  
4  
5 427 2010;465(7299):775-78. doi: 10.1038/nature09042  
6  
7 428 13. Hughes TF, Flatt JD, Fu B, et al. Interactive video gaming compared with health education in older  
8  
9 429 adults with mild cognitive impairment: a feasibility study. *International journal of geriatric*  
10  
11 430 *psychiatry* 2014;29(9):890-8. doi: 10.1002/gps.4075  
12  
13 431 14. Gates NJ, Sachdev PS, Singh MAF, et al. Cognitive and memory training in adults at risk of  
14  
15 432 dementia: A Systematic Review. *BMC geriatrics* 2011;11 doi: Artn 55  
16  
17  
18 433 10.1186/1471-2318-11-55  
19  
20 434 15. Huntley JD, Gould RL, Liu K, et al. Do cognitive interventions improve general cognition in  
21  
22 435 dementia? A meta-analysis and meta-regression. *Bmj Open* 2015;5(4) doi: ARTN e005247  
23  
24  
25 436 10.1136/bmjopen-2014-005247  
26  
27 437 16. Wilson RS, Mendes De Leon CF, Barnes LL, et al. Participation in cognitively stimulating activities  
28  
29 438 and risk of incident Alzheimer disease. *Jama* 2002;287(6):742-8.  
30  
31 439 17. Belleville S. Cognitive training for persons with mild cognitive impairment. *International*  
32  
33 440 *Psychogeriatrics* 2008;20(01) doi: 10.1017/s104161020700631x  
34  
35 441 18. Mowszowski L, Hermens DF, Diamond K, et al. Cognitive training enhances pre-attentive  
36  
37 442 neurophysiological responses in older adults 'at risk' of dementia. *Journal of Alzheimer's*  
38  
39 443 *disease : JAD* 2014;41(4):1095-108. doi: <https://dx.doi.org/10.3233/JAD-131985>  
40  
41  
42 444 19. Reijnders J, van Heugten C, van Boxtel M. Cognitive interventions in healthy older adults and  
43  
44 445 people with mild cognitive impairment: a systematic review. *Ageing Res Rev*  
45  
46 446 2013;12(1):263-75. doi: 10.1016/j.arr.2012.07.003  
47  
48 447 20. Gunther VK, Schafer P, Holzner BJ, et al. Long-term improvements in cognitive performance  
49  
50 448 through computer-assisted cognitive training: a pilot study in a residential home for older  
51  
52 449 people. *Aging & mental health* 2003;7(3):200-06. doi: 10.1080/1360786031000101175  
53  
54  
55  
56  
57  
58  
59



- 1  
2  
3 450 21. Cipriani G, Bianchetti A, Trabucchi M. Outcomes of a computer-based cognitive rehabilitation  
4  
5 451 program on Alzheimer's disease patients compared with those on patients affected by mild  
6  
7 452 cognitive impairment. Archives of gerontology and geriatrics 2006;43(3):327-35. doi:  
8  
9 453 10.1016/j.archger.2005.12.003  
10  
11 454 22. Gonzalez-Palau F, Franco M, Bamidis P, et al. The effects of a computer-based cognitive and  
12  
13 455 physical training program in a healthy and mildly cognitive impaired aging sample. Aging &  
14  
15 456 mental health 2014;18(7):838-46. doi: 10.1080/13607863.2014.899972  
16  
17 457 23. Rosen AC, Sugiura L, Kramer JH, et al. Cognitive training changes hippocampal function in mild  
18  
19 458 cognitive impairment: a pilot study. Journal of Alzheimer's disease : JAD 2011;26 Suppl  
20  
21 459 3:349-57. doi: 10.3233/jad-2011-0009  
22  
23 460 24. Eckroth-Bucher M, Siberski J. Preserving cognition through an integrated cognitive stimulation  
24  
25 461 and training program. Am J Alzheimers Dis Other Demen 2009;24(3):234-45. doi:  
26  
27 462 10.1177/1533317509332624  
28  
29 463 25. Galante E, Venturini G, Fiaccadori C. Computer-based cognitive intervention for dementia:  
30  
31 464 preliminary results of a randomized clinical trial. G Ital Med Lav Ergon 2007;29(3 Suppl  
32  
33 465 B):B26-32.  
34  
35 466 26. Gaitan A, Garolera M, Cerulla N, et al. Efficacy of an adjunctive computer-based cognitive  
36  
37 467 training program in amnesic mild cognitive impairment and Alzheimer's disease: a  
38  
39 468 single-blind, randomized clinical trial. International journal of geriatric psychiatry  
40  
41 469 2013;28(1):91-9. doi: <https://dx.doi.org/10.1002/gps.3794>  
42  
43 470 27. Zhuang JP, Fang R, Feng X, et al. The impact of human-computer interaction-based  
44  
45 471 comprehensive training on the cognitive functions of cognitive impairment elderly  
46  
47 472 individuals in a nursing home. Journal of Alzheimer's disease : JAD 2013;36(2):245-51. doi:  
48  
49 473 10.3233/jad-130158  
50  
51 474 28. Bavelier D, Green CS, Han DH, et al. Brains on video games. Nat Rev Neurosci 2011;12(12):763-8.  
52  
53 475 doi: 10.1038/nrn3135  
54  
55  
56  
57  
58  
59  
60

- 1  
2  
3 476 29. Li H, Li J, Li N, et al. Cognitive intervention for persons with mild cognitive impairment: A  
4  
5 477 meta-analysis. *Ageing research reviews* 2011;10(2):285-96. doi: 10.1016/j.arr.2010.11.003  
6  
7 478 30. Martin M, Clare L, Altgassen AM, et al. Cognition-based interventions for healthy older people  
8  
9 479 and people with mild cognitive impairment. *The Cochrane database of systematic reviews*  
10  
11 480 2011(1):CD006220. doi: 10.1002/14651858.CD006220.pub2  
12  
13 481 31. Simon SS, Yokomizo JE, Bottino CM. Cognitive intervention in amnesic Mild Cognitive  
14  
15 482 Impairment: a systematic review. *Neurosci Biobehav Rev* 2012;36(4):1163-78. doi:  
16  
17 483 10.1016/j.neubiorev.2012.01.007  
18  
19 484 32. Hill NT, Mowszowski L, Naismith SL, et al. Computerized Cognitive Training in Older Adults With  
20  
21 485 Mild Cognitive Impairment or Dementia: A Systematic Review and Meta-Analysis. *Am J*  
22  
23 486 *Psychiatry* 2016:appiajp201616030360. doi: 10.1176/appi.ajp.2016.16030360  
24  
25 487 33. Sherman DS, Mauser J, Nuno M, et al. The Efficacy of Cognitive Intervention in Mild Cognitive  
26  
27 488 Impairment (MCI): a Meta-Analysis of Outcomes on Neuropsychological Measures.  
28  
29 489 *Neuropsychol Rev* 2017;27(4):440-84. doi: 10.1007/s11065-017-9363-3  
30  
31 490 34. Coyle H, Traynor V, Solowij N. Computerized and virtual reality cognitive training for individuals  
32  
33 491 at high risk of cognitive decline: systematic review of the literature. *The American journal of*  
34  
35 492 *geriatric psychiatry : official journal of the American Association for Geriatric Psychiatry*  
36  
37 493 2015;23(4):335-59. doi: 10.1016/j.jagp.2014.04.009  
38  
39 494 35. Djabelkhir L, Wu YH, Vidal JS, et al. Computerized cognitive stimulation and engagement  
40  
41 495 programs in older adults with mild cognitive impairment: comparing feasibility, acceptability,  
42  
43 496 and cognitive and psychosocial effects. *Clinical interventions in aging* 2017;12:1967-75. doi:  
44  
45 497 10.2147/cia.s145769  
46  
47 498 36. Han JW, Son KL, Byun HJ, et al. Efficacy of the Ubiquitous Spaced Retrieval-based Memory  
48  
49 499 Advancement and Rehabilitation Training (USMART) program among patients with mild  
50  
51 500 cognitive impairment: a randomized controlled crossover trial. *Alzheimers Res Ther* 2017;9:8.  
52  
53 501 doi: 10.1186/s13195-017-0264-8  
54  
55  
56  
57  
58  
59  
60

- 1  
2  
3 502 37. Savulich G, Piercy T, Fox C, et al. Cognitive Training Using a Novel Memory Game on an iPad in  
4  
5 503 Patients with Amnesic Mild Cognitive Impairment (aMCI). *Int J Neuropsychopharmacol* 2017  
6  
7 504 doi: 10.1093/ijnp/pyx040  
8  
9 505 38. Higgins JPT GS, (editors). *Cochrane Handbook for Systematic Reviews of Interventions Version*  
10  
11 506 5.1.0 [updated March 2011]. : The Cochrane Collaboration 2011.  
12  
13 507 39. Hedges LV OI. *Statistical Methods for Meta-Analysis*: New York: Academic Press 1985.  
14  
15 508 40. Higgins JP, Thompson SG, Deeks JJ, et al. Measuring inconsistency in meta-analyses. *BMJ*  
16  
17 509 2003;327(7414):557-60. doi: 10.1136/bmj.327.7414.557  
18  
19 510 41. Borenstein M. *Introduction to meta-analysis*2009.  
20  
21 511 42. Moher D, Liberati A, Tetzlaff J, et al. Preferred reporting items for systematic reviews and  
22  
23 512 meta-analyses: the PRISMA statement. *BMJ* 2009;339:b2535. doi: 10.1136/bmj.b2535  
24  
25 513 43. Optale G, Urgesi C, Busato V, et al. Controlling memory impairment in elderly adults using virtual  
26  
27 514 reality memory training: a randomized controlled pilot study. *Neurorehabilitation and neural*  
28  
29 515 *repair* 2010;24(4):348-57. doi: 10.1177/1545968309353328  
30  
31 516 44. Barnes DE, Yaffe K, Belfor N, et al. Computer-based cognitive training for mild cognitive  
32  
33 517 impairment: results from a pilot randomized, controlled trial. *Alzheimer disease and*  
34  
35 518 *associated disorders* 2009;23(3):205-10. doi: 10.1097/WAD.0b013e31819c6137  
36  
37 519 45. Chandler MJ, Locke DEC, Duncan NL, et al. Computer versus Compensatory Calendar Training in  
38  
39 520 Individuals with Mild Cognitive Impairment: Functional Impact in a Pilot Study. *Brain*  
40  
41 521 *sciences* 2017;7(9):10. doi: 10.3390/brainsci7090112  
42  
43 522 46. Han JW, Lee H, Hong JW, et al. Multimodal cognitive enhancement therapy for patients with mild  
44  
45 523 cognitive impairment and mild dementia: A multi- center, randomized, controlled,  
46  
47 524 double-blind, crossover trial. *Journal of Alzheimer's Disease* 2017;55(2):787-96. doi:  
48  
49 525 <http://dx.doi.org/10.3233/JAD-160619>  
50  
51 526 47. Fiatarone Singh MA, Gates N, Saigal N, et al. The Study of Mental and Resistance Training  
52  
53 527 (SMART) study-resistance training and/or cognitive training in mild cognitive impairment: a  
54  
55  
56  
57  
58  
59  
60

- 1  
2  
3 528 randomized, double-blind, double-sham controlled trial. *J Am Med Dir Assoc*  
4  
5 529 2014;15(12):873-80. doi: 10.1016/j.jamda.2014.09.010  
6  
7 530 48. Gagnon LG, Belleville S. Training of attentional control in mild cognitive impairment with  
8  
9 531 executive deficits: results from a double-blind randomised controlled study.  
10  
11 532 *Neuropsychological rehabilitation* 2012;22(6):809-35. doi:  
12  
13 533 <https://dx.doi.org/10.1080/09602011.2012.691044>  
14  
15 534 49. Papp KV WS, Snyder PJ. Immediate and delayed effects of cognitive interventions in healthy  
16  
17 535 elderly: a review of current literature and future directions. . 2009  
18  
19 536 50. Martin M CL, Altgassen AM, Cameron MH, Zehnder F. Cognition-based interventions for healthy  
20  
21 537 older people and people with mild cognitive impairment. . 2011  
22  
23 538 51. Vidovich MR, Lautenschlager NT, Flicker L, et al. The PACE study: A randomized clinical trial of  
24  
25 539 cognitive activity strategy training for older people with mild cognitive impairment.  
26  
27 540 *American Journal of Geriatric Psychiatry* 2015;23(4):360-72. doi:  
28  
29 541 <http://dx.doi.org/10.1016/j.jagp.2014.04.002>  
30  
31 542 52. Petersen RC. Mild cognitive impairment clinical trials. 2003  
32  
33 543 53. Libon DJ XS, Eppig J, Wicas G, Lamar M, Lippa C, Bettcher BM, Price CC, Giovannetti T, Swenson R,  
34  
35 544 Wambach DM. The heterogeneity of mild cognitive impairment: a neuropsychological  
36  
37 545 analysis. 2009  
38  
39 546 54. V. Solfrizzi FP, A.M. Colacicco, A. D'Introno, C. Capurso, F. Torres, F. Grigoletto, S. Maggi, A. Del  
40  
41 547 Parigi, E.M. Reiman, R.J. Caselli, E. Scafato, G. Farchi, A. Capurso. Vascular risk factors,  
42  
43 548 incidence of MCI, and rates of progression to dementia. 2004  
44  
45 549 55. Herrera C, Chambon C, Michel BF, et al. Positive effects of computer-based cognitive training in  
46  
47 550 adults with mild cognitive impairment. *Neuropsychologia* 2012;50(8):1871-81. doi:  
48  
49 551 10.1016/j.neuropsychologia.2012.04.012  
50  
51  
52  
53  
54  
55  
56  
57  
58  
59

- 1  
2  
3 552 56. Hyer L, Scott C, Atkinson MM, et al. Cognitive Training Program to Improve Working Memory in  
4  
5 553 Older Adults with MCI. Clin Gerontologist 2016;39(5):410-27. doi:  
6  
7 554 10.1080/07317115.2015.1120257  
8  
9 555 57. Barnett SM CS. When and where do we apply what we learn? A taxonomy for far transfer. 2002  
10  
11 556 58. Meta-Analysis CCTiOAWMCIoDASRa. Far transfer in cognitive training of older adults. 2014  
12  
13 557 59. Stojanoski B, Lyons KM, Pearce AAA, et al. Targeted training: Converging evidence against the  
14  
15 558 transferable benefits of online brain training on cognitive function. Neuropsychologia 2018  
16  
17 559 doi: 10.1016/j.neuropsychologia.2018.07.013  
18  
19  
20 560  
21  
22  
23  
24  
25  
26  
27  
28  
29  
30  
31  
32  
33  
34  
35  
36  
37  
38  
39  
40  
41  
42  
43  
44  
45  
46  
47  
48  
49  
50  
51  
52  
53  
54  
55  
56  
57  
58  
59  
60

561  
562**Table 1.** Characteristics of studies using computerised cognitive training in persons with MCI

| Author and Year     | Treatment Group N, % male, mean age, mean education, MMSE (SD)                       | Control Group N, ratio of male, mean age, mean education, MMSE (SD)                   | CCT type for EC and type of CC                                           | Frequency, duration and total hours                                       | Drop-out (%)                     | Cognitive Training Intervention                                                                                                                                                                                | Assessment interval (time pre or post intervention) | Included for meta-analysis |
|---------------------|--------------------------------------------------------------------------------------|---------------------------------------------------------------------------------------|--------------------------------------------------------------------------|---------------------------------------------------------------------------|----------------------------------|----------------------------------------------------------------------------------------------------------------------------------------------------------------------------------------------------------------|-----------------------------------------------------|----------------------------|
| Barban et al 2016   | N = 46<br>Ratio = 54.3%<br>Age = 74.4 (5.7)<br>Edu = 9<br>MMSE = 27.3 (2.1)          | N = 60<br>Ratio = 51.7%<br>Age = 72.9 (6.0)<br>Edu = 11<br>MMSE = 28.1 (1.4)          | EC: multi domain training.<br>CC: passive(rest )                         | 60 minute sessions, 2 sessions per week for 3 months.<br>Total = 24 hours | n/s                              | Computerised software: 'SOCIALABLE' using touch screen.<br>Multi-component -CT including Memory, attentional Executive Function, orientation, logical reasoning, constructional Praxis, language.              | Before and after training, follow-up (n/s)#         | Yes                        |
| Chandler et al 2017 | N = 27<br>Ratio = 73.3%<br>Age = 77.4 (7.2)<br>Edu = 16.2 (2.6)<br>MMSE = 26.7 (3.0) | N = 30<br>Ratio = 50.0 %<br>Age = 76.2 (7.0)<br>Edu = 16.0 (2.4)<br>MMSE = 25.8 (3.2) | EC: Auditory memory training<br>CC: Active( Memory Support System (MSS)) | Frequency: n/s<br>Duration: n/s<br>Total = 10 hours                       | EC:4<br>CC:3<br>Total:10.9<br>4% | "Auditory Brain Training" software: 6 adaptive modules exercises to recognize and differentiate sounds, match or repeat sounds, remember increasingly difficult directions, and remember details from stories. | n/s                                                 | No*                        |

1  
2  
3  
4  
5  
6  
7  
8  
9  
10  
11  
12  
13  
14  
15  
16  
17  
18  
19  
20  
21  
22  
23  
24  
25  
26  
27  
28  
29  
30  
31  
32  
33  
34  
35  
36  
37  
38  
39  
40  
41  
42  
43  
44  
45  
46  
47

| Author and Year        | Treatment Group N, % male, mean age, mean education, MMSE (SD)                                          | Control Group N, ratio of male, mean age, mean education, MMSE (SD)                                     | CCT type for EC and type of CC                                                | Frequency, duration and total hours                                    | Drop-out (%)                | Cognitive Training Intervention                                                                                                                                                                   | Assessment interval (time pre or post intervention) | Include d for meta-analysis |
|------------------------|---------------------------------------------------------------------------------------------------------|---------------------------------------------------------------------------------------------------------|-------------------------------------------------------------------------------|------------------------------------------------------------------------|-----------------------------|---------------------------------------------------------------------------------------------------------------------------------------------------------------------------------------------------|-----------------------------------------------------|-----------------------------|
| Ciarmiello et al. 2015 | N = 15<br>Ratio = 35.7%<br>Age = 71.2 (7.7)<br>Edu = 9.3 (3.02)<br>MMSE = 27.9 (1.8)                    | N = 15<br>Ratio = 46.7%<br>Age = 72.0 (7.1)<br>Edu = 7.8 (2.6)<br>MMSE = 27.8(1.9)                      | EC: multi domain<br>CC: semi-active (meeting with psychologist – no computer) | 45 minute sessions, 2 days per week for 4 months.<br>Total = 24 hours. | EC: 0<br>CC: 0<br>0%        | Computerised training with multiple difficulty levels. Includes dual-task training, executive function training, working memory updating, visual exploration, spatial orienting tasks.            | Before and after training follow-up (n/s)           | Yes                         |
| Djabelkhjr et al 2017  | N = 10<br>Ratio = 30.0 %<br>Age = 75.2 (6.4)<br>Edu = 60.0% (6) (of college level)<br>MMSE = 27.7 (1.9) | N = 10<br>Ratio = 40.0 %<br>Age = 78.2 (7.0)<br>Edu = 44.4% (4) (of college level)<br>MMSE = 27.4 (2.0) | EC: multi-domain<br>CC: Active(multi-component )                              | 90 mins per session<br>1 sessions/week, 12 weeks.<br>Total = 18 hours. | EC: 1<br>CC: 0<br>Total: 5% | 'KODRO' (Altera-Group, Paris, France), a web-based platform with several applications (ie, appointment and event reminding, cognitive games, communication, entertainment, videos and a library). | Before and after training. Follow-up (n/s)          | Yes                         |

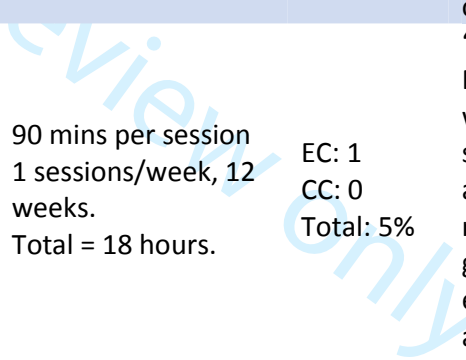

| Author and Year             | Treatment Group N, % male, mean age, mean education, MMSE (SD)          | Control Group N, ratio of male, mean age, mean education, MMSE (SD)     | CCT type for EC and type of CC                 | Frequency, duration and total hours                                                        | Drop-out (%)                  | Cognitive Training Intervention                                                                                                                            | Assessment interval (time pre or post intervention)                                                           | Include d for meta-analysis |
|-----------------------------|-------------------------------------------------------------------------|-------------------------------------------------------------------------|------------------------------------------------|--------------------------------------------------------------------------------------------|-------------------------------|------------------------------------------------------------------------------------------------------------------------------------------------------------|---------------------------------------------------------------------------------------------------------------|-----------------------------|
| Fiatarone Singh et al. 2014 | N = 24<br>Ratio = n/s<br>Age = >55<br>Edu = n/s<br>MMSE = 28.0 (2.0)    | N = 27<br>Ratio = n/s<br>Age = >55<br>Edu = n/s<br>MMSE = 27.0 (2.0)    | EC: multi domain<br>CC: active (sham)          | 75 minute sessions, 2 or 3 days per week for 26 weeks.<br>Total = 80 hours.                | EC: 2<br>CC: 3<br>Total: 9.8% | COGPACK program: Computer-based multimodal and multi domain exercises targeting memory, executive function, attention, and speed of information processing | At baseline and 6 months and at least 72 hours after the previous training session<br>Follow-up: at 18 months | Yes                         |
| Finn & McDonald 2011        | N = 8<br>ratio = 37.5%<br>age = 69.0<br>Edu = 13.3<br>MMSE = 28.5 (2.3) | N = 8<br>ratio = 62.5%<br>age = 76.4<br>Edu = 12.0<br>MMSE = 27.5 (2.4) | EC: Multi-domain<br>CC: Waiting list (Passive) | 30 minute sessions, 4-5 sessions a week for an average of 11.43 weeks.<br>Total = 25 hours | EC: 4<br>CC: 5<br>Total: 32%  | Lumosity Inc CCT package. Four broad cognitive domains targeted: attention, processing speed, visual memory and cognitive control                          | Before and after training<br>Follow-up (n/s)                                                                  | Yes                         |



| Author and Year             | Treatment Group N, % male, mean age, mean education, MMSE (SD)         | Control Group N, ratio of male, mean age, mean education, MMSE (SD)    | CCT type for EC and type of CC                       | Frequency, duration and total hours                                         | Drop-out (%)                    | Cognitive Training Intervention                                                                                                     | Assessment interval (time pre or post intervention)    | Include d for meta-analysis |
|-----------------------------|------------------------------------------------------------------------|------------------------------------------------------------------------|------------------------------------------------------|-----------------------------------------------------------------------------|---------------------------------|-------------------------------------------------------------------------------------------------------------------------------------|--------------------------------------------------------|-----------------------------|
| Finn and McDonald 2015      | N = 12<br>ratio = 66%<br>age = 72.8<br>Edu = 13.8<br>MMSE = 27.8 (1.3) | N = 12<br>ratio = 75%<br>age = 75.1<br>Edu = 13.7<br>MMSE = 27.8 (1.9) | EC: Single memory domain<br>CC: Passive              | 2 sessions per week for 4 weeks<br>Total = n/s                              | EC: 4<br>CC: 3<br>Total:22.6 %  | Repetition-lag training to improve recollection memory                                                                              | First and last training session<br>Follow-up (n/s)     | Yes                         |
| Gagnon & Belleville 2012    | N = 12<br>ratio = n/s<br>age = 67.0<br>Edu = 15.0<br>MMSE = 28.1 (1.2) | N = 12<br>ratio = n/s<br>age = 68.4<br>Edu = 13.1<br>MMSE = 27.8 (1.5) | EC: Single domain(attentional control)<br>CC: Active | 60 minute sessions, 3 times a week for 2 weeks.<br>Total = 6 hours          | EC: 1<br>CC: 1<br>Total: 8%     | Programme targeting attentional control using Variable Priority (VP) training in a dual task with selected priorities and feedback. | One week pre and after intervention<br>Follow-up (n/s) | Yes                         |
| Gooding et al. 2016 study 1 | N = 31<br>ratio = 58.1%<br>age = 75.6<br>Edu = 15.1<br>MMSE = n/s      | N = 10<br>ratio = 58.1%<br>age = 75.6<br>Edu = 15.1<br>MMSE = n/s      | EC: Multi-domain<br>CC: Active                       | 60 min sessions, two days per week for 16 weeks<br>Total = approx. 30 hours | EC: 12<br>CC: 1<br>Total: 20.3% | Posit Science's BrainFitness – repeated drill-and-practice adaptive exercises involving memory, attention and executive functions.  | Before and after training<br>Follow-up (n/s)           | Yes                         |

| Author and Year              | Treatment Group N, % male, mean age, mean education, MMSE (SD)                             | Control Group N, ratio of male, mean age, mean education, MMSE (SD)                          | CCT type for EC and type of CC                                             | Frequency, duration and total hours                                         | Drop-out (%)                       | Cognitive Training Intervention                                                                                                                                               | Assessment interval (time pre or post intervention) | Include d for meta-analysis |
|------------------------------|--------------------------------------------------------------------------------------------|----------------------------------------------------------------------------------------------|----------------------------------------------------------------------------|-----------------------------------------------------------------------------|------------------------------------|-------------------------------------------------------------------------------------------------------------------------------------------------------------------------------|-----------------------------------------------------|-----------------------------|
| Gooding et al. 2016 study 1  | N = 23<br>ratio = 58.1%<br>age = 75.6<br>Edu = 15.1<br>MMSE = n/s                          | N = 10<br>ratio = 58.1%<br>age = 75.6<br>Edu = 15.1<br>MMSE = n/s                            | EC:<br>Multi-domain<br>in<br>CC: Active                                    | 60 min sessions, two days per week for 16 weeks<br>Total = approx. 30 hours | EC: 12<br>CC: 1<br>Total:<br>20.3% | Posit Science's BrainFitness – repeated drill-and-practice adaptive exercises involving memory, attention and executive functions.                                            | Before and after training<br>Follow-up (n/s)        | Yes                         |
| Hagovska and Olekszyova 2016 | N = 40<br>ratio = 55%<br>age = 68<br>Edu = 75% of secondary education<br>MMSE = 26.0 (2.6) | N = 40<br>ratio = 48%<br>age = 65.9<br>Edu = 70% of secondary education<br>MMSE = 26.0 (1.5) | EC: Multi domain + balance training<br>CC: Passive( just balance training) | 30 minute sessions, 2 times a week for 10 weeks.<br>Total = 10 hours        | EC: 0<br>CC: 2<br>Total:<br>2.5%   | CogniPlus training program Battery contains subprograms for attention, Working Memory, long-term memory, executive functions, spatial processing and visuomotor coordination. | Before and after training<br>Follow-up (n/s)        | Yes                         |

| Author and Year    | Treatment Group N, % male, mean age, mean education, MMSE (SD)                       | Control Group N, ratio of male, mean age, mean education, MMSE (SD)                | CCT type for EC and type of CC                         | Frequency, duration and total hours                                                  | Drop-out (%)               | Cognitive Training Intervention                                                                                           | Assessment interval (time pre or post intervention) | Include d for meta-a nalysis |
|--------------------|--------------------------------------------------------------------------------------|------------------------------------------------------------------------------------|--------------------------------------------------------|--------------------------------------------------------------------------------------|----------------------------|---------------------------------------------------------------------------------------------------------------------------|-----------------------------------------------------|------------------------------|
| Han et al 2017     | N = 23<br>Ratio = 56.5%<br>Age = 73.7 ± 4.8<br>Edu = 13.5 ± 3.2<br>MMSE = 25.7 ± 3.2 | N = 20<br>Ratio = 50.0%<br>Age = 74.5 ± 6.4<br>Edu = 12.7 ± 3.7<br>MMSE=24.5 ± 2.4 | EC: single memory training<br>CC: Passive (Usual Care) | 30 min per session<br>1 hour per day<br>2 sessions/week, 4 weeks.<br>Total = 4 hours | EC:3<br>CC:5<br>Total: 16% | USMART program involving spaced retrieval-based memory training, using a self-administered application on an iPad tablet. | Week 0, 5<br>Follow-up (n/s)#                       | Yes                          |
| Herrera et al 2012 | N = 11<br>ratio = 54%<br>age = 75<br>Edu = n/s<br>MMSE = 27.4 (0.5)                  | N = 11<br>ratio = 45%<br>age = 78<br>Edu = n/s<br>MMSE = 27.2 (0.4)                | EC: Multidomain<br>CC: Active                          | 60 minute sessions, 2 days a week for 12 weeks.<br>Total = 24 hours                  | 0%                         | Several computer-based training exercises designed to improve memory and attention                                        | 0, 12 weeks ± 15 days<br>Follow-up: at 24 weeks     | Yes                          |
| Hughes et al 2014  | N = 10<br>ratio = 20%<br>age = 78.5 (7.1)<br>Edu = 13.8 (2.4)<br>MMSE = 27.2 (1.9)   | N = 10<br>ratio = 40%<br>age = 76.2 (4.3)<br>Edu = 13.1 (1.9)<br>MMSE = 27.1 (1.8) | EC: Multidomain<br>CC: Active                          | 90 minute sessions, once a week for 24 weeks. Total = 36 hours                       | 0%                         | Group-based Nintendo Wii sports package.<br>Group-based Interactive video gaming                                          | 0, 24 weeks ± 1 weeks<br>Follow-up: (n/s)           | Yes                          |

| Author and Year      | Treatment Group N, % male, mean age, mean education, MMSE (SD)                       | Control Group N, ratio of male, mean age, mean education, MMSE (SD)                  | CCT type for EC and type of CC                                                          | Frequency, duration and total hours                                               | Drop-out (%)                   | Cognitive Training Intervention                                                                                                                                                          | Assessment interval (time pre or post intervention)                 | Included for meta-analysis |
|----------------------|--------------------------------------------------------------------------------------|--------------------------------------------------------------------------------------|-----------------------------------------------------------------------------------------|-----------------------------------------------------------------------------------|--------------------------------|------------------------------------------------------------------------------------------------------------------------------------------------------------------------------------------|---------------------------------------------------------------------|----------------------------|
| Hyer Lee et al. 2016 | N = 34<br>ratio = 50%<br>age = 75.1<br>Edu = 70% secondary<br>MMSE = n/s             | N = 34<br>ratio = 44%<br>age = 75.2<br>Edu = 66% secondary<br>MMSE = n/s             | EC: Single domain (working memory)<br>CC: Active (Sham)                                 | 25 days of 40 min sessions, completed over 5 to 7 weeks.<br>Total = 16.7 hours    | EC: 4<br>CC: 5<br>Total: 11.7% | Cogmed – adaptive WM training                                                                                                                                                            | Before and after training<br>Follow-up: 3 months after intervention | Yes                        |
| Lin et al 2016       | N = 10<br>Ratio = 50.0%<br>Age = 75.2 ± 7.4<br>Edu = 15.9 ± 1.3<br>MMSE = 26.6 ± 2.9 | N = 11<br>Ratio = 54.5%<br>Age = 75.2 ± 7.4<br>Edu = 15.9 ± 1.3<br>MMSE = 26.6 ± 2.9 | EC: Single domain speed-of-processing<br>CC: active control (mental leisure activities) | 1 hour per day<br>4 days per week for 6 weeks in their homes.<br>Total = 24 hours | EC:2<br>CC:1<br>Total: 12.5%   | INSIGHT online program: (vision-based speed-of-processing) which included five training tasks: eye for detail, peripheral challenge, visual sweeps, double decision, and target tracker. | Before and after training<br>Follow-up (n/s)#                       | Yes                        |
| Optale et al 2010    | N = 15<br>ratio = 59.1%<br>age = 78.5<br>Edu = 5.3<br>MMSE = 22.9 (5.0)              | N = 16<br>ratio = 31.25%<br>age = 81.6<br>Edu = 6<br>MMSE = 21.0 (4.8)               | EC: Single domain - Memory<br>CC: Active                                                | 30 minute sessions, 3 times a week for 3 months.<br>Total = 58.5 hours            | EC: 3<br>CC: 2<br>Total: 16.1% | A Virtual Reality-based memory training programme                                                                                                                                        | Before and after training<br>Follow-up: 3 months after intervention | No**                       |

1  
2  
3  
4  
5  
6  
7  
8  
9  
10  
11  
12  
13  
14  
15  
16  
17  
18  
19  
20  
21  
22  
23  
24  
25  
26  
27  
28  
29  
30  
31  
32  
33  
34  
35  
36  
37  
38  
39  
40  
41  
42  
43  
44  
45  
46  
47

| Author and Year    | Treatment Group N, % male, mean age, mean education, MMSE (SD)           | Control Group N, ratio of male, mean age, mean education, MMSE (SD)      | CCT type for EC and type of CC                                                                          | Frequency, duration and total hours                                                    | Drop-out (%) | Cognitive Training Intervention                                                                | Assessment interval (time pre or post intervention ) | Include d for meta-a nalysis |
|--------------------|--------------------------------------------------------------------------|--------------------------------------------------------------------------|---------------------------------------------------------------------------------------------------------|----------------------------------------------------------------------------------------|--------------|------------------------------------------------------------------------------------------------|------------------------------------------------------|------------------------------|
| Rosen et al 2011   | N = 6<br>ratio = n/s<br>age = 70.7<br>Edu = 16.7<br>MMSE = 29.3 (1.2)    | N = 6<br>ratio = n/s<br>age = 78.0<br>Edu = 18.3<br>MMSE = 27.8 (2.3)    | EC:<br>processing speed and accuracy in auditory processing<br>CC:<br>computer-based activities(Active) | 100 minute sessions, 5 times a week for 8 weeks.<br>Total = 36 hours                   | 0%           | processing speed and accuracy in auditory processing                                           | Before and after training<br>Follow-up (n/s)         | Yes                          |
| Rozzini et al 2007 | N = 15<br>ratio = n/s<br>age = 63 - 78<br>Edu = n/s<br>MMSE = 26.0 (1.6) | N = 22<br>ratio = n/s<br>age = 63 - 78<br>Edu = n/s<br>MMSE = 26.4 (1.9) | EC:<br>Multidomain and medication<br>CC:<br>Medication only (Passive)                                   | 60 minute session, 5 days a week for 4 weeks in 3 discrete blocks.<br>Total = 60 hours | 0%           | Cognitive exercises based on Neuropsychology Training combined with a cholinesterase inhibitor | Before and after training<br>Follow-up (n/s)         | Yes                          |

For peer review only

| Author and Year     | Treatment Group N, % male, mean age, mean education, MMSE (SD)                                               | Control Group N, ratio of male, mean age, mean education, MMSE (SD)                                          | CCT type for EC and type of CC                                   | Frequency, duration and total hours                             | Drop-out (%) | Cognitive Training Intervention                            | Assessment interval (time pre or post intervention)                           | Include d for meta-a nalysis |
|---------------------|--------------------------------------------------------------------------------------------------------------|--------------------------------------------------------------------------------------------------------------|------------------------------------------------------------------|-----------------------------------------------------------------|--------------|------------------------------------------------------------|-------------------------------------------------------------------------------|------------------------------|
| Savulich et al 2017 | N = 21<br>Ratio = 52.4%<br>Age = 75.2 ± 7.4<br>Edu = 15.9 ± 1.3<br>(Age left education)<br>MMSE = 26.6 ± 2.9 | N = 21<br>Ratio = 66.7%<br>Age = 76.9 ± 8.3<br>Edu = 16.0 ± 2.1<br>(Age left education)<br>MMSE = 26.8 ± 2.2 | EC: a novel memory game<br>CC: negative (clinic visits as usual) | 1 hour per session, 8 hours within 4 weeks.<br>Total = 8 hours. | 0 %          | Gameshow program: Computer-based episodic memory training. | At a maximum of 4 weeks after the baseline testing session<br>Follow-up (n/s) | Yes                          |

Notes: MMSE: Mini Mental State Examination, SD: Standard deviation, n/s: not stated, EC: Experimental condition, CC: Control condition.

\*Excluded from meta-analysis due to immediate cognitive outcomes not stated, \*\* Excluded from meta-analysis due to suspected inclusion of individuals with AD. # cross-over studies, no available data could be used.

567

**Table 2** Results of Meta-analysis of computerised cognitive training (CCT) on cognitive domains

| Analysis of CCT    | No. of studies | N Tx*/control | Pooled Effect size g (95% CI) | Overall effect: Z (P value) | Heterogeneity: I <sup>2</sup> % (P value) |
|--------------------|----------------|---------------|-------------------------------|-----------------------------|-------------------------------------------|
| Global Cognition   | 11             | 258/245       | 0.23 (0.03, 0.44)             | z= 2.22, p = 0.03           | 6% p = 0.39                               |
| Memory             | 13             | 245/232       | 0.30 (0.11, 0.50)             | z = 3.03, p = 0.002         | 46% p = 0.04                              |
| Working Memory     | 5              | 82/83         | 0.39 (0.12, 0.66)             | z = 2.85, p = 0.004         | 0% p = 0.81                               |
| Executive Function | 11             | 171/182       | 0.20 (-0.03, 0.43)            | z= 1.74, p = 0.08           | 51% p = 0.03                              |

568

\*Tx = training group.

569

For peer review only

1  
2  
3  
4  
5 570 Figure 1 Flow chart of the study selection process

6  
7 571 Figure 2 Forest plot demonstrating the efficacy of CCT on global cognition function

8  
9 572 Figure 3 Forest plot demonstrating the efficacy of CCT on memory, working memory and executive function

10  
11 573

12  
13  
14  
15  
16  
17  
18  
19  
20  
21  
22  
23  
24  
25  
26  
27  
28  
29  
30  
31  
32  
33  
34  
35  
36  
37  
38  
39  
40  
41  
42  
43  
44  
45  
46  
47

For peer review only



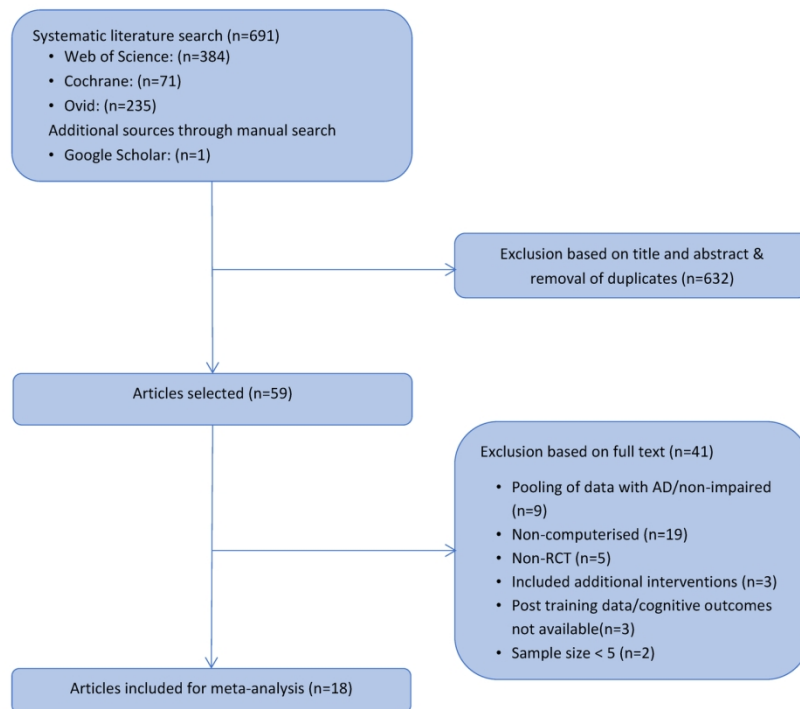

Figure 1. Flow chart of the study selection process

155x115mm (300 x 300 DPI)

1  
2  
3  
4  
5  
6  
7  
8  
9  
10  
11  
12  
13  
14  
15  
16  
17  
18  
19  
20  
21  
22  
23  
24  
25  
26  
27  
28  
29  
30  
31  
32  
33  
34  
35  
36  
37  
38  
39  
40  
41  
42  
43  
44  
45  
46  
47  
48  
49  
50  
51  
52  
53  
54  
55  
56  
57  
58  
59  
60

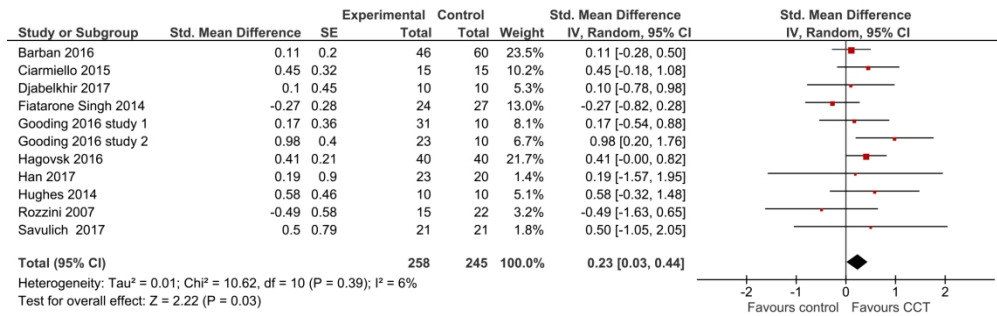

Figure 2 Forest plot demonstrating the efficacy of CCT on global cognitive function

195x62mm (300 x 300 DPI)

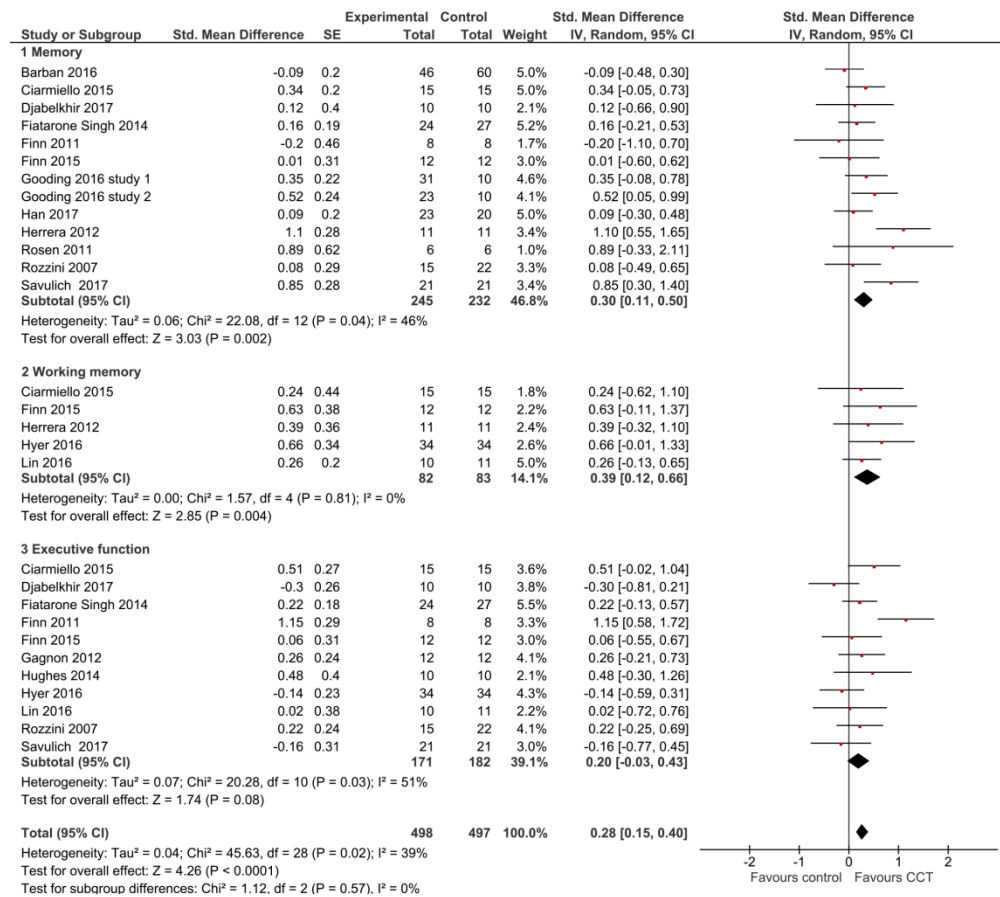

Figure 3 Forest plot demonstrating the efficacy of CCT on memory, working memory and executive function

195x173mm (300 x 300 DPI)

1  
2  
3 Supplement to: Zhang H, Huntley J, et al. The efficacy of Computerized Cognitive Training on  
4 cognitive outcomes in Mild Cognitive Impairment: A Systematic Review and Meta-Analysis.  
5  
6

7  
8 Supplementary Figure 1 summary of risk of bias for included studies  
9

10  
11 Supplementary Figure 2 Funnel plot demonstrating bias of CCT on global cognitive function  
12

13  
14 Supplementary Figure 3 Forest plot demonstrating efficacy of CCT on global cognition stratified by  
15 the type of control group  
16

17  
18 Supplementary Figure 4 Funnel plot demonstrating bias of CCT on global cognition stratified by the  
19 type of control group  
20

21  
22 Supplementary Figure 5 Funnel plot demonstrating bias of CCT on memory, working memory and  
23 executive function  
24

25  
26 Supplementary Figure 6 Forest plot demonstrating efficacy of CCT on memory stratified by the type  
27 of control group  
28

29  
30 Supplementary Figure 7 Funnel plot demonstrating bias of CCT on memory stratified by the type of  
31 control group  
32

33  
34 Supplementary Figure 8 Forest plot demonstrating efficacy of CCT on executive function stratified by  
35 the type of control group  
36

37  
38 Supplementary Figure 9 Funnel plot demonstrating bias of CCT on executive cognition stratified by  
39 the type of control group  
40

41  
42 Supplementary Figure 10 Forest plot demonstrating efficacy of CCT on memory stratified by single  
43 memory domain or multi-domain intervention  
44

45  
46 Supplementary Figure 11 Funnel plot demonstrating bias of CCT on memory stratified by single  
47 memory domain or multi-domain intervention  
48

49  
50 Supplementary Figure 12 Forest plot demonstrating efficacy of CCT on global cognition stratified by  
51 dose of the intervention  
52

53  
54 Supplementary Figure 13 Funnel plot demonstrating bias of CCT on global cognition stratified by  
55 dose of the intervention  
56  
57  
58  
59  
60

A.

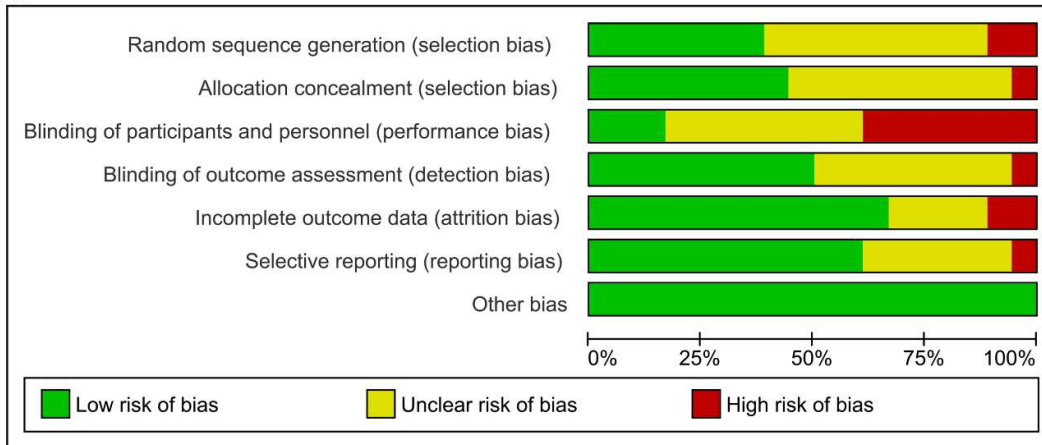

B.

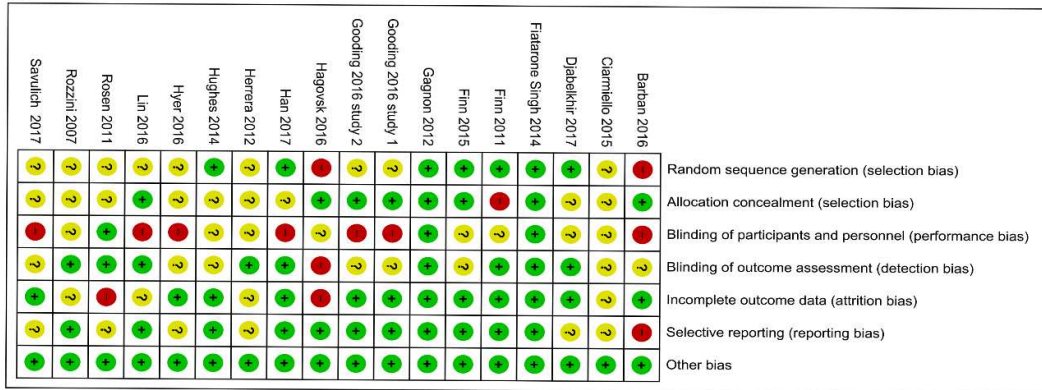

Supplementary Figure 1 (A-B). Summary of risk of bias for included studies. (A). Risk of bias graph: review authors' judgements about each risk of bias item presented as percentages across all included studies. (B). Risk of bias summary: review authors' judgements about each risk of bias item for each included study.

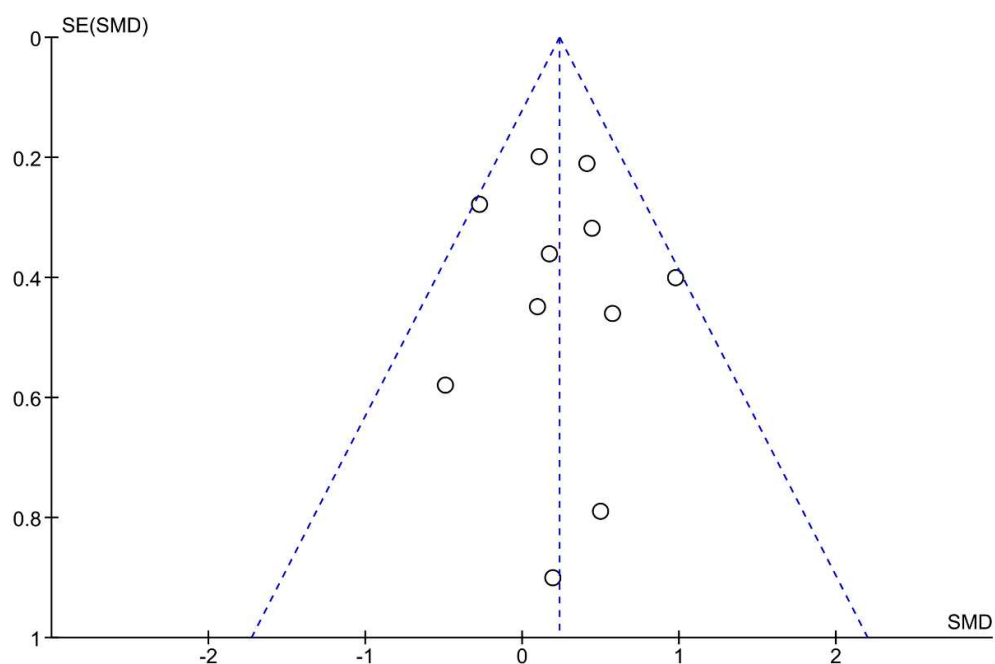

Supplementary Figure 2. Funnel plot demonstrating bias of CCT on global cognitive function

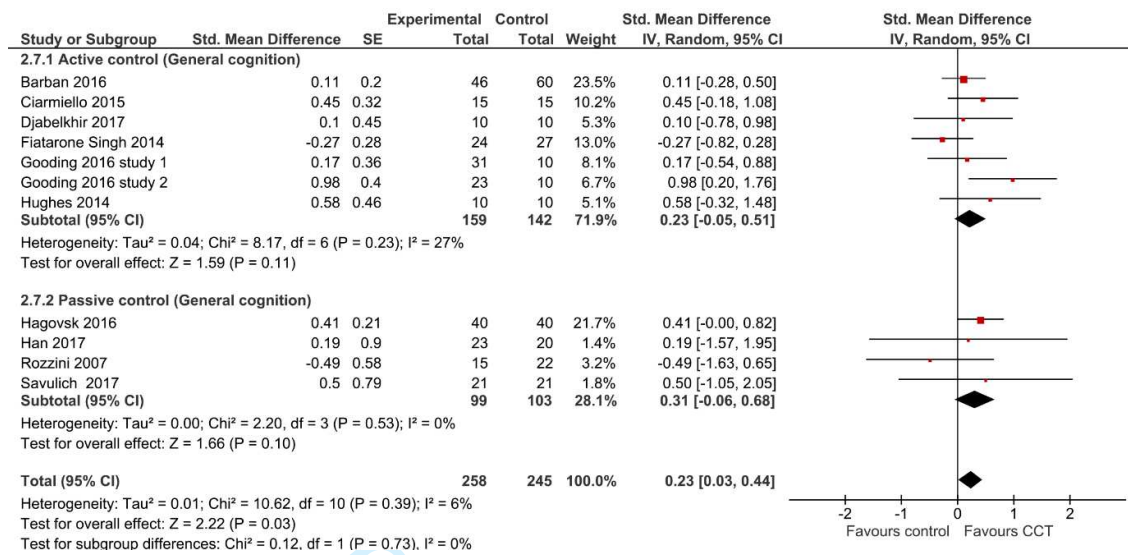

Supplementary Figure 3. Forest plot demonstrating efficacy of CCT on global cognition stratified by the type of control group

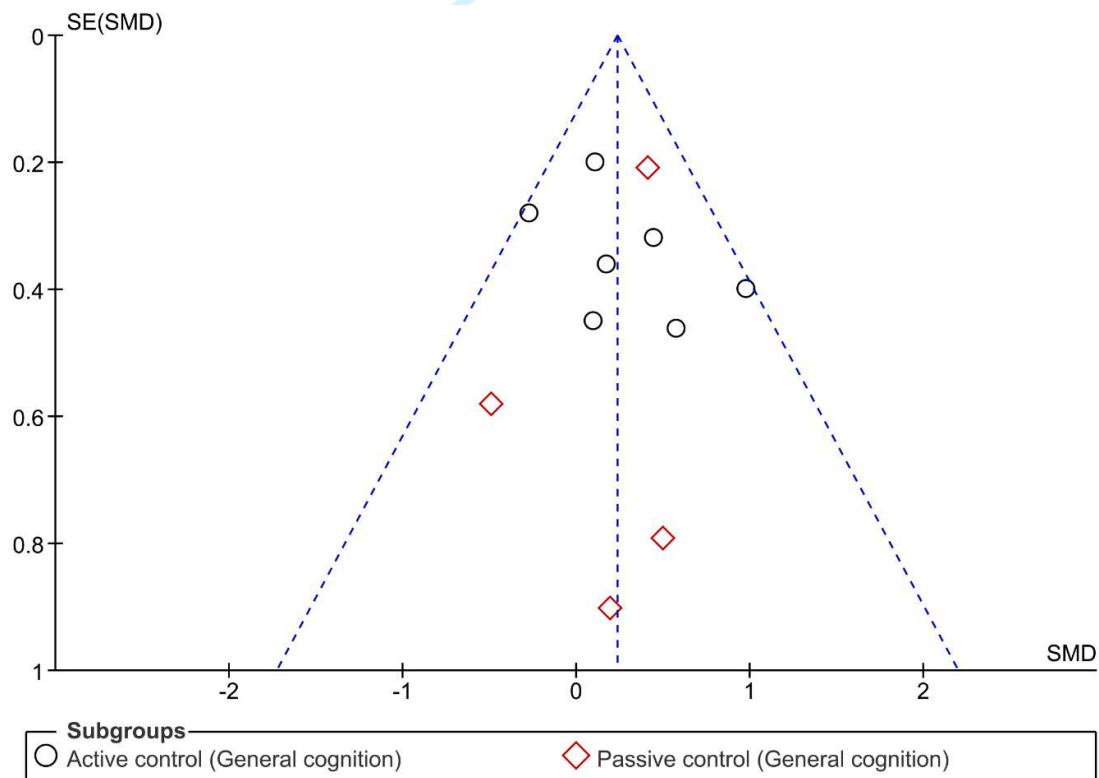

Supplementary Figure 4. Funnel plot demonstrating bias of CCT on global cognition stratified by the type of control group

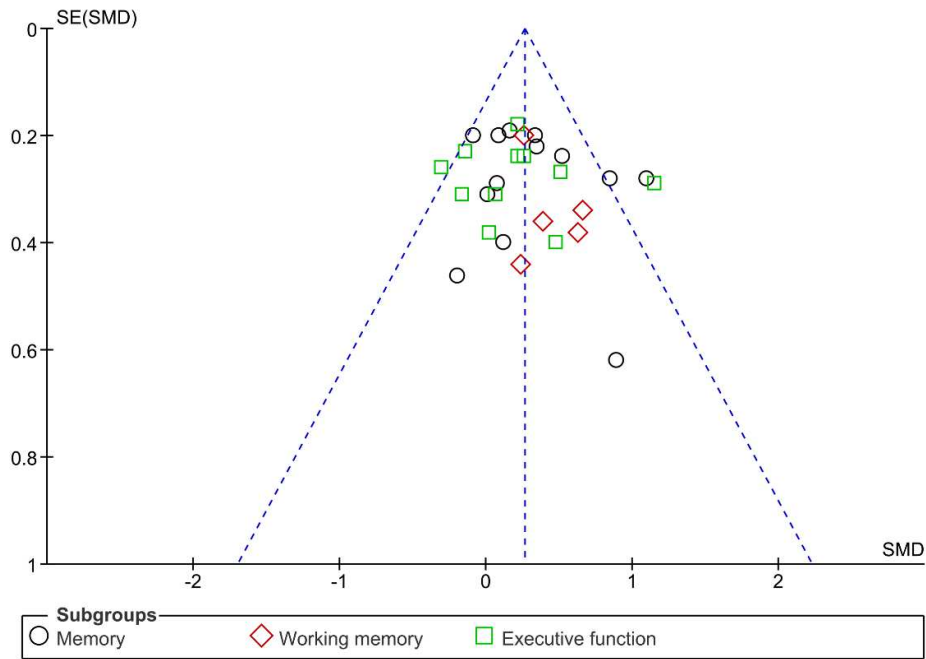

Supplementary Figure 5. Funnel plot demonstrating bias of CCT on memory, working memory and executive function

review only



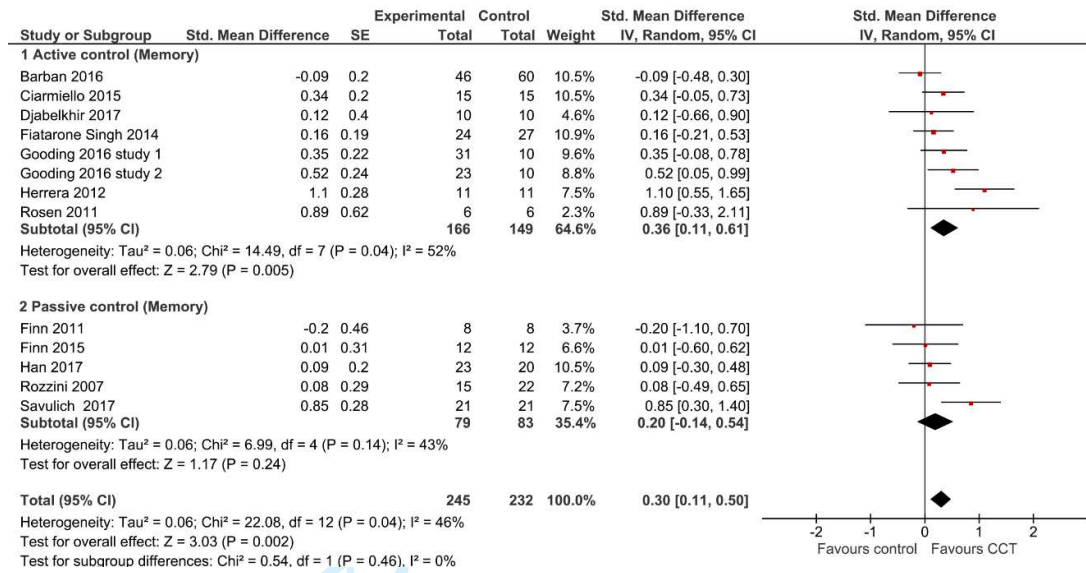

Supplementary Figure 6. Forest plot demonstrating efficacy of CCT on memory stratified by the type of control group

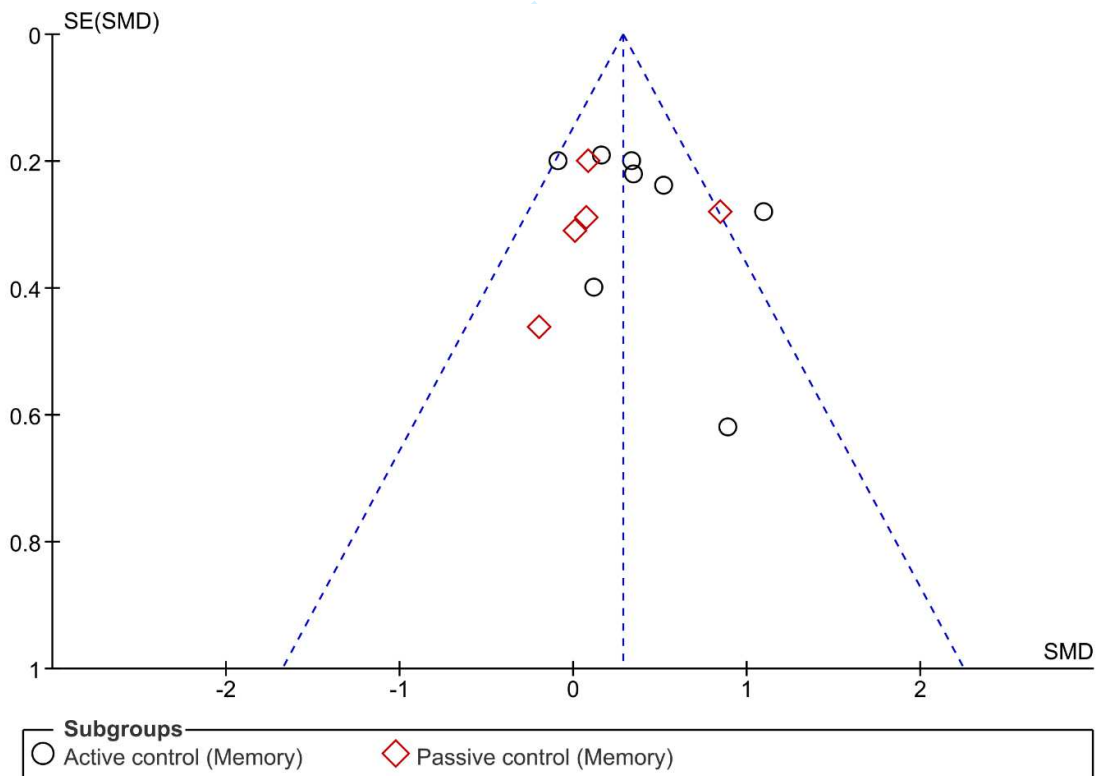

Supplementary Figure 7. Funnel plot demonstrating bias of CCT on memory stratified by the type of control group

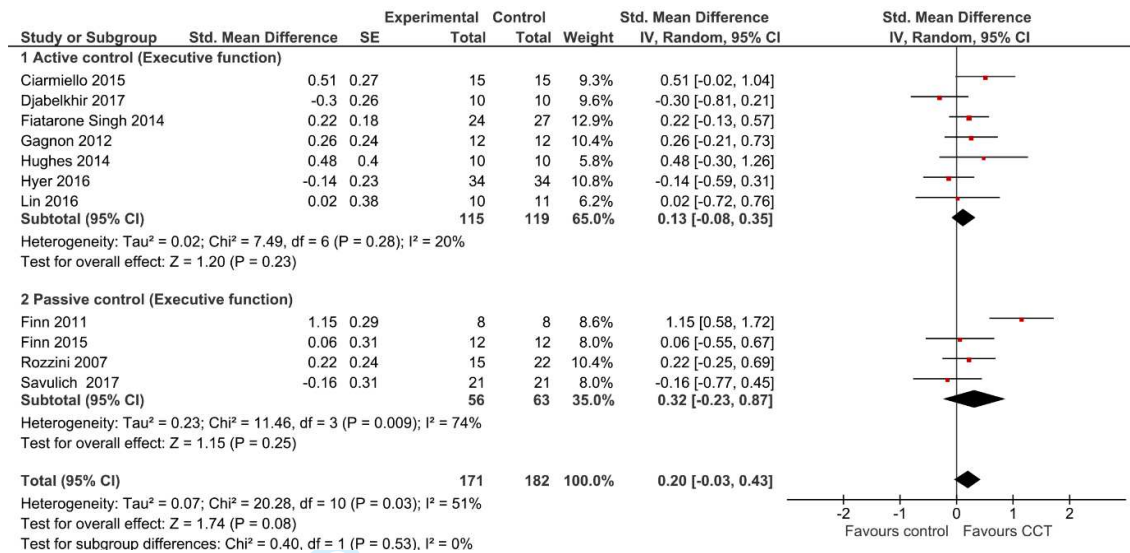

Supplementary Figure 8. Forest plot demonstrating efficacy of CCT on executive function stratified by the type of control group

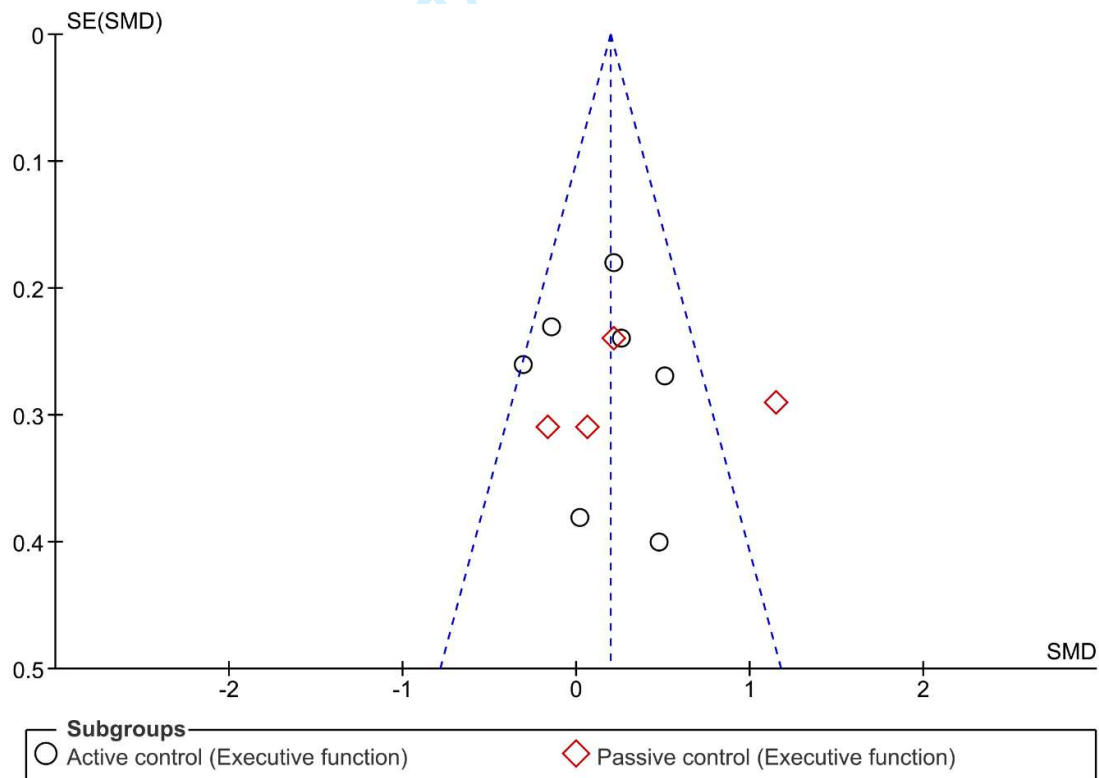

Supplementary Figure 9. Funnel plot demonstrating bias of CCT on executive cognition stratified by the type of control group

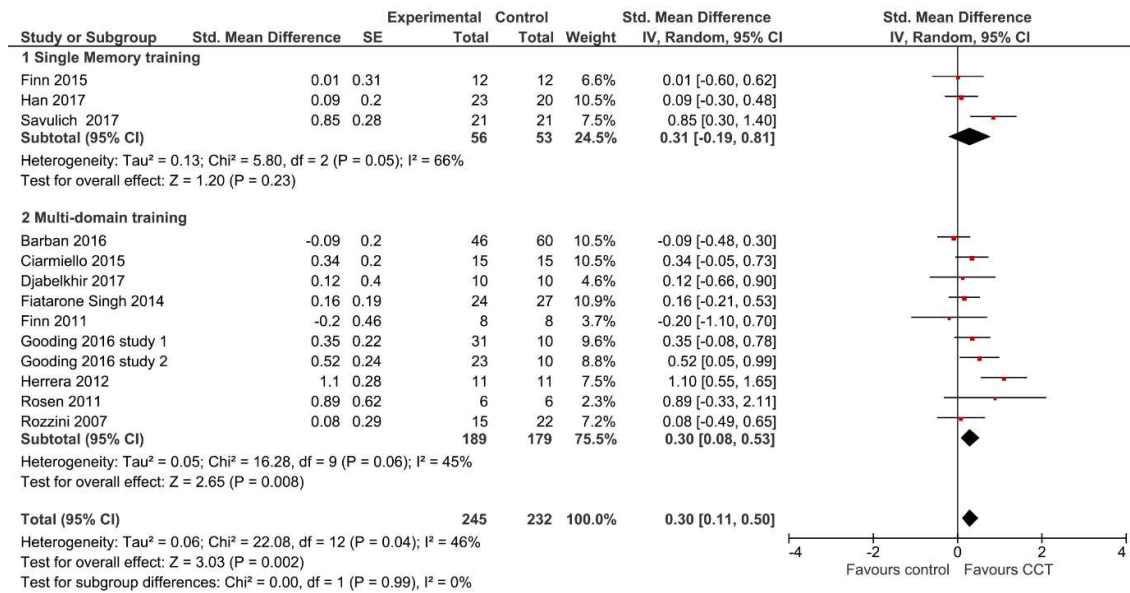

Supplementary Figure 10 Forest plot demonstrating efficacy of CCT on memory stratified by single memory domain or multi-domain intervention

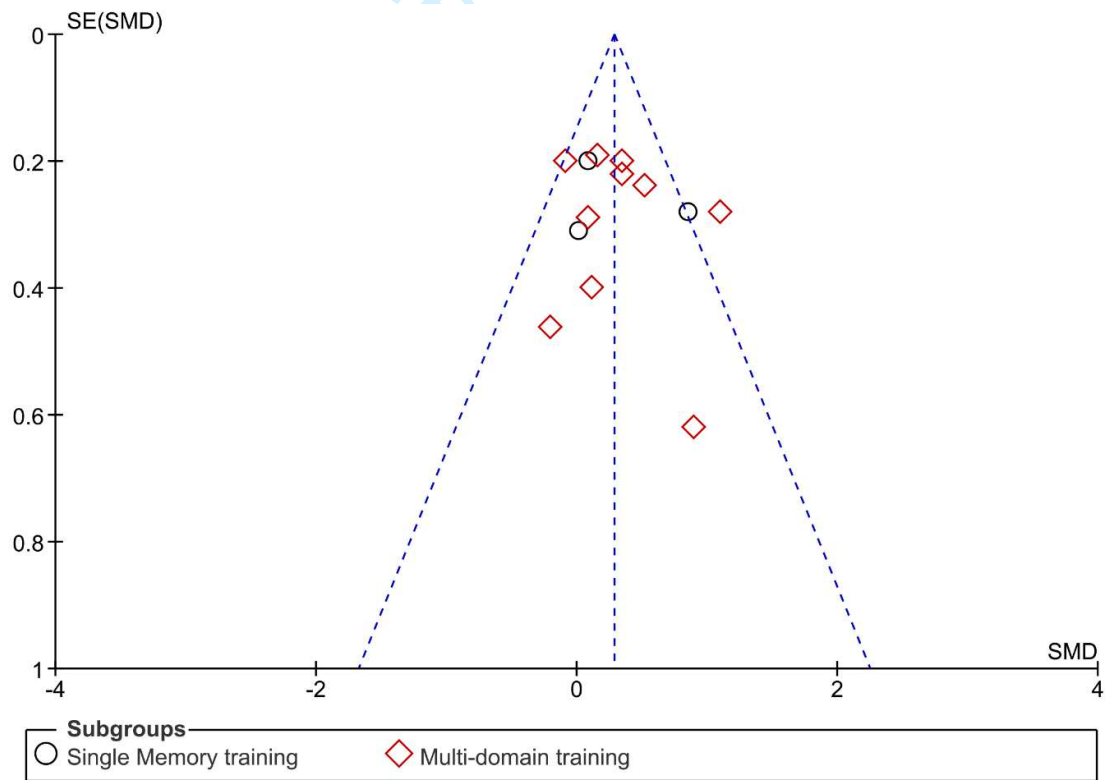

Supplementary Figure 11 Funnel plot demonstrating bias of CCT on memory stratified by single memory domain or multi-domain intervention

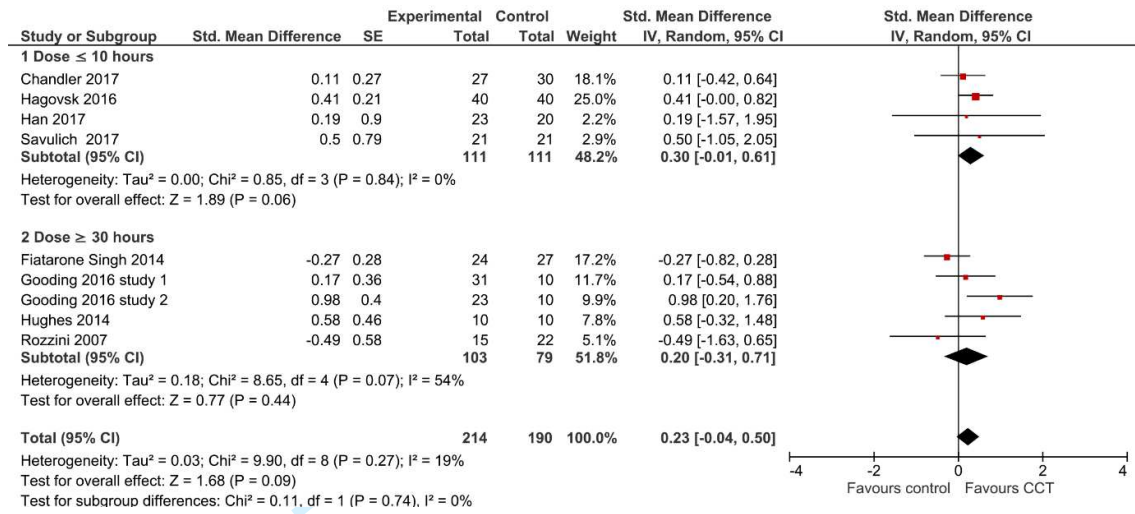

Supplementary Figure 12 Forest plot demonstrating efficacy of CCT on global cognition stratified by dose of the intervention

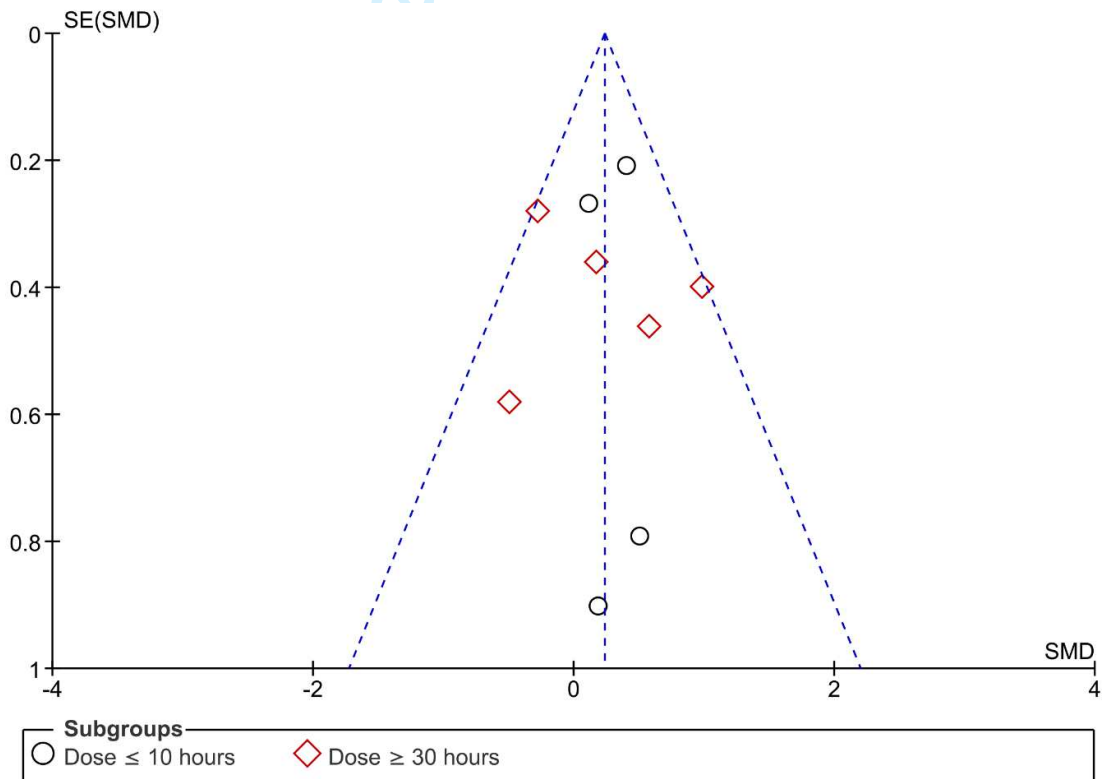

Supplementary Figure 13 Funnel plot demonstrating bias of CCT on global cognition stratified by dose of the intervention

1  
2  
3  
4  
5  
6  
7  
8  
9  
10  
11  
12  
13  
14  
15  
16  
17  
18  
19  
20  
21  
22  
23  
24  
25  
26  
27  
28  
29  
30  
31  
32  
33  
34  
35  
36  
37  
38  
39  
40  
41  
42  
43  
44  
45  
46

Supplement to: Zhang H, Huntley J, et al. The efficacy of Computerized Cognitive Training on cognitive outcomes in Mild Cognitive Impairment:  
A Systematic Review and Meta-Analysis.

**Supplementary Table 1** Search terms used for literature search

**Supplementary Table 2.** Brief description of the specific outcome measures included in the meta-analysis

**Supplementary Appendix 1** Statistical methods

**Supplementary Table 1.** Search terms used for literature search

|                           |                                                                                                                                                                                                                                                                                                                                                                                                                                                                                                                                                                                                                                                                                                                                                                                                                                                                                                                                                                                                                                                                                                                                                                                                                   |
|---------------------------|-------------------------------------------------------------------------------------------------------------------------------------------------------------------------------------------------------------------------------------------------------------------------------------------------------------------------------------------------------------------------------------------------------------------------------------------------------------------------------------------------------------------------------------------------------------------------------------------------------------------------------------------------------------------------------------------------------------------------------------------------------------------------------------------------------------------------------------------------------------------------------------------------------------------------------------------------------------------------------------------------------------------------------------------------------------------------------------------------------------------------------------------------------------------------------------------------------------------|
| <b>Intervention Terms</b> | <p>“cognitive stimulation” OR “cognitive rehabilitation” OR “cognitive training” OR “cognitive therapy” OR “cognitive retraining” OR “cognitive support” OR “cognitive intervention” OR “cognitive exercise” OR “cognitive strategy” OR “cognitive aid” OR “memory function” OR “memory rehabilitation” OR “memory therapy” OR “memory aid” OR “memory group” OR “memory training” OR “memory retraining” OR “memory support” OR “memory stimulation” OR “memory strategy” OR “memory management” OR “brain training” OR “brain rehabilitation” OR “brain stimulation” OR “brain retraining” OR “brain exercise” OR “neuropsychological training” OR “neuropsychological therapy” OR “neuropsychological strategy” OR “neuropsychological aid” OR “neuropsychological stimulation” OR “neuropsychological rehabilitation” OR “neuropsychological exercise” OR “neuropsychological intervention” OR “neuropsychological retraining” OR “neuropsychological support” OR “psychostimulation” OR “executive training” OR “executive stimulation” OR “executive rehabilitation” OR “attention training” OR “attentional training” OR “attentional rehabilitation” OR “global stimulation” OR “reality orientation”</p> |
| <b>Study Terms</b>        | <p>“RCT” OR “controlled trial” OR random*</p>                                                                                                                                                                                                                                                                                                                                                                                                                                                                                                                                                                                                                                                                                                                                                                                                                                                                                                                                                                                                                                                                                                                                                                     |
| <b>Subject Terms</b>      | <p>“Mild cognitive impairment” OR “memory impairment” OR “cognitive impairment” OR “memory disorder” OR “cognitive disorder” OR “memory dysfunction” OR “cognitive dysfunction” OR “MCI” OR “AAMI” OR “MCD” OR “mild cognitive disorder”</p>                                                                                                                                                                                                                                                                                                                                                                                                                                                                                                                                                                                                                                                                                                                                                                                                                                                                                                                                                                      |

**Supplementary Table 2.** Brief description of the specific outcome measures included in the meta-analysis

| Outcome measure                                              | Domain  | Brief Description                                                                                                                                                                                                              | Study                                                                                                                                                        |
|--------------------------------------------------------------|---------|--------------------------------------------------------------------------------------------------------------------------------------------------------------------------------------------------------------------------------|--------------------------------------------------------------------------------------------------------------------------------------------------------------|
| Mini Mental State Examination (MMSE)                         | GEN COG | A 30-point questionnaire used to estimate severity of cognitive impairment including orientation and memory functions                                                                                                          | Barben et al, 2016<br>Ciarmiello et al. 2015<br>Djabelkhir et al 2017<br>Han et al 2017<br>Hagovska et al. 2015<br>Rozzini et al 2007<br>Savulich et al 2017 |
| Modified Mini Mental State Examination (mMMSE)               | GEN COG | This instrument included all items from the standard MMSE, plus the Wechsler Adult Intelligence Scale–Revised Digit Span subtest and additional attention/calculation and general knowledge, language, and construction items. | Gooding et al 2015 study 1&2                                                                                                                                 |
| Alzheimer’s Disease Assessment Scale-Cognitive (ADAS-Cog)    | GEN COG | Measuring severity of cognitive dysfunction associated with Alzheimer’s disease, and is widely used in pharmacological studies of dementia and MCI. Higher scores indicate more dysfunction.                                   | Fiatarone Singh et al 2014                                                                                                                                   |
| Computerised Assessment of Mild Cognitive Impairment (CAMCI) | GEN COG | A battery of tests to assess cognitive performance including domains of attention, executive functioning, memory and processing speed                                                                                          | Hughes et al 2014                                                                                                                                            |
| Milan Overall Dementia Assessment (MODA)                     | GEN COG | The MODA is a paper and pencil test, composed of three sections: an autonomy scale, a section testing orientation and a section testing a wide range of cognitive domains.                                                     | Ciarmiello et al. 2015                                                                                                                                       |
| 16-item free and cued reminding test                         | MEM     | Participants search a card containing four pictures of items with matched category cues before subjected to tests of free and cued recall                                                                                      | Herrera et al 2012<br>Djabelkhir et al 2017                                                                                                                  |
| BEM-144 recall test                                          | MEM     | A 12-word immediate recall test from BEM-144 memory battery                                                                                                                                                                    | Herrera et al 2012                                                                                                                                           |

| Outcome measure                                                                               | Domain | Brief Description                                                                                                                                                                                                                                                                                   | Study                                                               |
|-----------------------------------------------------------------------------------------------|--------|-----------------------------------------------------------------------------------------------------------------------------------------------------------------------------------------------------------------------------------------------------------------------------------------------------|---------------------------------------------------------------------|
| Description of the visual recognition memory task (DMS48)                                     | MEM    | Participants asked to remember a sample before making a delayed forced-choice match to original sample                                                                                                                                                                                              | Herrera et al 2012<br>Ciarmiello et al. 2015                        |
| Doors Recognition subtest                                                                     | MEM    | Participants are shown a variety of different coloured doors which they must remember and later recognise from a selection of similar doors                                                                                                                                                         | Herrera et al 2012                                                  |
| MMSE - Recall Test                                                                            | MEM    | Participants presented with stimuli before being asked to recall as many as possible                                                                                                                                                                                                                | Herrera et al 2012                                                  |
| Paired-associates learning (PAL)                                                              | MEM    | Visual patterns revealed in different boxes before participant tested on where pattern originally located                                                                                                                                                                                           | Finn & McDonald 2011<br>Finn & McDonald 2015<br>Savulich et al 2017 |
| Pattern Recognition Memory (PRM)                                                              | MEM    | Test of visual pattern recognition in a forced discrimination paradigm                                                                                                                                                                                                                              | Finn & McDonald 2011                                                |
| Recall of Rey's Complex Figure                                                                | MEM    | Subjects shown complex figure and then tested on their delayed recall of the figure                                                                                                                                                                                                                 | Herrera et al 2012<br>Rozzini et al 2007                            |
| Rey's figure copy                                                                             | MEM    | Participants are to reproduce a drawing by i) copying (reproduction) and ii) memory (recall) using a 18-point scoring system                                                                                                                                                                        | Rozzini et al 2007                                                  |
| List Learning Memory Sum from ADAS-Cog                                                        | MEM    | List learning assessed across the three memory recall trials of the ADAS-Cog. Higher scores indicate better memory.                                                                                                                                                                                 | Fiatarone Singh et al 2014                                          |
| Benton Visual Retention Test-Revised (BVRT-R)                                                 | MEM    | BVRT-R is a visual memory test which assesses visual perception and visual constructional abilities as participants are required to draw from memory simple designs. Higher scores indicate better function.                                                                                        | Fiatarone Singh et al 2014<br>Savulich et al 2017                   |
| The Logical Memory subtest of the Wechsler Memory Scale 3rd edition (immediately and delayed) | MEM    | The logic memory is used to measure both immediate (I) and delayed (II) memory for verbal information. Participants are presented with a simple narrative and are required to recall as many details of the story as they can immediately after presentation. Higher scores indicate better memory. | Fiatarone Singh et al 2014                                          |
| Rey Auditory Verbal Learning Test (RAVLT)                                                     | MEM    | RAVLT includes a list of 15 words to be recalled immediately after each of the 5 verbal presentations and after a 30-min delay                                                                                                                                                                      | Barben et al, 2016<br>Ciarmiello et al. 2015                        |



| Outcome measure                                     | Domain | Brief Description                                                                                                                                                                                                                                                                                                                                                                                                    | Study                        |
|-----------------------------------------------------|--------|----------------------------------------------------------------------------------------------------------------------------------------------------------------------------------------------------------------------------------------------------------------------------------------------------------------------------------------------------------------------------------------------------------------------|------------------------------|
| Prose memory                                        | MEM    | A subset of The Memory Assessment Scales, is an auditory verbal prose recall task which requires the subject to recall a short story. Subjects are asked to recall the story from memory and are then asked nine questions about details of the story.                                                                                                                                                               | Ciarmiello et al. 2015       |
| visuospatial memory test (VST)                      | MEM    | From the Cognitive Efficiency Profile                                                                                                                                                                                                                                                                                                                                                                                | Djabelkhir et al 2017        |
| Buschke Selective Reminding Test (BSRT)             | MEM    | The test provides 12 words which are selectively rehearsed by the subject until they are memorized. That is, only those words not recalled on the immediately preceding trial are presented. The subject then attends to an interference task or verbal list. Subsequently, after a delay, the subject is asked to recall the words.                                                                                 | Gooding et al 2015 study 1&2 |
| WMS-R Visual Reproductions (VR) I and II subtests   | MEM    | VR assesses visual memory. Cards with printed designs is shown to the participants. Following each exposure and a 30 minutes delay, subjects draw what they remember of the design.                                                                                                                                                                                                                                  | Gooding et al 2015 study 1&2 |
| WMS-R Logical Memory (LM)Subtests I and II subtests | MEM    | LM. The examiner reads two stories, stopping after each reading for an immediate free recall. And a 30 minutes delayed recall.                                                                                                                                                                                                                                                                                       | Gooding et al 2015 study 1&2 |
| The Word List Memory Test (WLMT)                    | MEM    | Word list task that contains 10 semantically unrelated words The words are presented to the subject one at a time and are read aloud Three trials are administered in this fashion, with the order of the 10 words being randomized for each trial The examiner records the order of recall and notes any intrusions that might occur The primary Indices of Interest are the number of words recalled on each trial | Han et al 2017               |
| The Word List Recall Test (WLRT)                    | MEM    | Words, displayed one at a time for one second each. Participants read each of the words, and try to remember them without taking notes.                                                                                                                                                                                                                                                                              | Han et al 2017               |

| Outcome measure                  | Domain | Brief Description                                                                                                                                                                                                                                                                                                                                                                                                                                                                                    | Study                                       |
|----------------------------------|--------|------------------------------------------------------------------------------------------------------------------------------------------------------------------------------------------------------------------------------------------------------------------------------------------------------------------------------------------------------------------------------------------------------------------------------------------------------------------------------------------------------|---------------------------------------------|
| WLRcT(The Word List Recognition) | MEM    | A word list was designed so that half its words would denote targets when any of a number of target classes were defined. After scanning this list for targets, subjects were unexpectedly tested on their ability to recognize the words they had scanned.                                                                                                                                                                                                                                          | Han et al 2017                              |
| RBANS Memory Score               | MEM    | It consists of 12 subtests, which yield five Index scores (i.e., Attention, Language, Visuospatial/Constructional, Immediate Memory, and Delayed Memory) and a Total Scale score.                                                                                                                                                                                                                                                                                                                    | Rosen et al 2011                            |
| Dot counting test                | WM     | The task dot counting requires examinees to count the dots as quickly as possible by the fastest means possible.                                                                                                                                                                                                                                                                                                                                                                                     | Lin et al 2016                              |
| 1-back test                      | WM     | In the 1-Back task, participants are presented a sequence of stimuli one-by-one. For each stimulus, they need to decide if the current stimulus is the same as the one presented 1 trials ago.                                                                                                                                                                                                                                                                                                       | Lin et al 2016                              |
| Digit Span Test                  | WM     | Sequence of digits is read aloud. Subjects asked to immediately recall digits in the correct order. If correct, a sequence with an additional digit is presented.                                                                                                                                                                                                                                                                                                                                    | Herrera et al 2012<br>Ciarmiello et al 2015 |
| LNS (Letter-Number Sequencing)   | WM     | The task involves listening to and remembering a string of digits and letters read aloud at a speed of one per second, then recalling the information by repeating the numbers in chronological order, followed by the letters in alphabetical order.                                                                                                                                                                                                                                                | Hyer et al 2016                             |
| Spatial Span                     | WM     | Participants tested on ability to remember the location of objects on a spatial grid.                                                                                                                                                                                                                                                                                                                                                                                                                | Hyer et al 2016                             |
| Spatial Span (Corsi test)        | WM     | Corsi is a short term memory task conceptually similar to the digit span test. the experimenter (the person who carries out the study) shows nine blocks arranged in front of the participant, the experimenter taps a sequence of blocks (for example, the experimenter taps a sequence of 3 different blocks, one after another), the participant needs to tap the blocks that the experimenter showed, in the same order, steps 1-3 are repeated multiple times with different lengths of blocks. | Ciarmiello et al. 2015                      |

| Outcome measure                             | Domain | Brief Description                                                                                                                                                                                                                                                                                                                                                                                                                                                                    | Study                      |
|---------------------------------------------|--------|--------------------------------------------------------------------------------------------------------------------------------------------------------------------------------------------------------------------------------------------------------------------------------------------------------------------------------------------------------------------------------------------------------------------------------------------------------------------------------------|----------------------------|
| Spatial working memory (SWM)                | WM     | A test that requires retention and manipulation of visuospatial information to collect 'tokens' and fill a column                                                                                                                                                                                                                                                                                                                                                                    | Finn & McDonald 2011       |
| Symbol Span                                 | WM     | This subtest assesses visual working memory using novel visual stimuli. Beginning with two symbols, abstract visual symbols are exposed for 5 seconds. In the test phase, the participant has to correctly recall not only the correct symbols from distractor items, but also the order in which they were presented from left to right. The number of symbols presented increases by one at intervals as the test progresses. Higher scores indicate better visual working memory. | Finn & McDonald et al 2015 |
| Word span                                   | WM     | Participants tested on ability to remember a list of words in order.                                                                                                                                                                                                                                                                                                                                                                                                                 | Ciarmiello et al. 2015     |
| Alpha span task                             | WM     | In the alpha span test, short lists of words are presented and the participant's task is to mentally reorder the words and give them back in correct alphabetical order.                                                                                                                                                                                                                                                                                                             | Ciarmiello et al. 2015     |
| Intra-/extra-dimensional set shifting (IED) | EXE    | A test of rule acquisition and reversal. It is computerised analogue of the Wisconsin Card Sorting test and measured the total errors made                                                                                                                                                                                                                                                                                                                                           | Finn & McDonald 2011       |
| Modified Dual Task                          | EXE    | Participants completed a modified dual task consisting of a visual detection task (responding to an appearance of a stimuli) and alpha-arithmetic task (responding 'true' or 'false' to equations of letters and numbers e.g. 'U-1 = T') simultaneously and were recorded in accuracy of responses in each task                                                                                                                                                                      | Gagnon & Belleville 2012   |
| Raven's coloured matrices                   | EXE    | 60 patterns present in order of difficulty. Subjects asked to identify the missing element that completes a pattern                                                                                                                                                                                                                                                                                                                                                                  | Rozzini et al 2007         |
| Short Story                                 | EXE    | Participants are asked to recall a short story                                                                                                                                                                                                                                                                                                                                                                                                                                       | Rozzini et al 2007         |
| Telephone Search Dual Task                  | EXE    | Participants complete the telephone search test whilst simultaneously counting audible tones                                                                                                                                                                                                                                                                                                                                                                                         | Gagnon & Belleville 2012   |
| Telephone Search Test                       | EXE    | Participants circle key stimuli while searching entries in a simulated classified telephone directory                                                                                                                                                                                                                                                                                                                                                                                | Gagnon & Belleville 2012   |

| Outcome measure                                       | Domain | Brief Description                                                                                                                                                                                                                                                                                                                                                                          | Study                                                                              |
|-------------------------------------------------------|--------|--------------------------------------------------------------------------------------------------------------------------------------------------------------------------------------------------------------------------------------------------------------------------------------------------------------------------------------------------------------------------------------------|------------------------------------------------------------------------------------|
| Trial making test                                     | EXE    | The task requires participants to 'connect the dots' in two parts, firstly numerically and secondly, alphanumerically                                                                                                                                                                                                                                                                      | Gagnon & Belleville 2012, Hughes et al 2014, Djabelkhir et al 2017 Hyer et al 2016 |
| Verbal fluency                                        | EXE    | Participants generate as many words in one minute from a given letter.                                                                                                                                                                                                                                                                                                                     | Rozzini et al 2007, Djabelkhir et al 2017                                          |
| Visual Elevator Test                                  | EXE    | Participants count up and down according to visual stimuli in an elevator, the time-per-direction-change score was calculated                                                                                                                                                                                                                                                              | Gagnon & Belleville 2012                                                           |
| Raven's progressive matrices - non-verbal test (PM47) | EXE    | The Raven Standard Progressive Matrices (PM47) assess the logical-deductive skill. ?                                                                                                                                                                                                                                                                                                       | Ciarmiello et al. 2015                                                             |
| Rey–Osterrieth complex figure test (ROCF)             | EXE    | ROCF is a neuropsychological assessment in which examinees are asked to reproduce a complicated line drawing, first by copying it freehand (recognition), and then drawing from memory (recall).                                                                                                                                                                                           | Ciarmiello et al. 2015                                                             |
| Categorical verbal fluency (animals)                  | EXE    | Participants generate as many animal names as possible in one minute.                                                                                                                                                                                                                                                                                                                      | Fiatarone Singh et al 2014 Djabelkhir et al 2017                                   |
| Number sequencing<br>Number-Letter switching          | EXE    | In Number Sequencing, the participant is asked to draw a line connecting numbers in order from low to high as quickly as possible without making mistakes, and is a measure of attention. In Number-Letter switching, the task is to switch between connecting numbers and letters, in order, from lowest to highest, e.g., 1-A, 2-B, 3-C etc., and is a measure of cognitive flexibility. | Finn & McDonald et al 2015                                                         |
| Tracking A, Tracking B                                | EXE    | Two tracking tasks requiring participants to (1) track numbers (from 24-1) in reverse order (Tracking A), and (2) months forward (January – December) and numbers in reverse (Tracking B).                                                                                                                                                                                                 | Hughes et al 2014                                                                  |
| Useful field of view (UFOV)                           | EXE    | UFOV is a computerized test assessing visual processing speed and attention.                                                                                                                                                                                                                                                                                                               | Lin et al 2016                                                                     |
| Verbal fluency                                        | EXE    | (Phonemic and categorical fluency)?                                                                                                                                                                                                                                                                                                                                                        | Lin et al 2016                                                                     |
| Cognitive control                                     | EXE    | Set shifting and flanker tasks?                                                                                                                                                                                                                                                                                                                                                            | Lin et al 2016                                                                     |

| Outcome measure                    | Domain | Brief Description                                                                                                                                                                                                                                                                                                                                                                                        | Study                      |
|------------------------------------|--------|----------------------------------------------------------------------------------------------------------------------------------------------------------------------------------------------------------------------------------------------------------------------------------------------------------------------------------------------------------------------------------------------------------|----------------------------|
| Cross-modality dual task (Divided) | EXE    | Participants were subjected to a dual-task simultaneously consisting of a visual detection (as above) with a digit span task (orally recalling a list of digits) and recorded span items recalled correctly in %.                                                                                                                                                                                        | Gagnon & Belleville 2012   |
| The CANTAB CRT(speed)              | EXE    | It is used to assess motor speed and thus acts as a control measure of general alertness to help interpret other cognitive tasks. An arrow will appear on either the left or right side of a computer screen. After the arrow appears, the participant is instructed to press a corresponding left or right button, using a response box, as quickly as possible.                                        | Savulich et al 2017        |
| WAIS-III Similarities              | EXE    | WAIS Similarities is a subtest from the WAIS-III used to measure verbal conception formation and abstractive thinking. Higher scores indicate better function.                                                                                                                                                                                                                                           | Fiatarone Singh et al 2014 |
| WAIS-III Matrices                  | EXE    | WAIS Matrices is a perceptual subtest of the Wechsler Adult Intelligence Scale-III and is used to assess executive functions posing four types of non-verbal reasoning tasks including pattern completion, classification, abstraction and serial reasoning, and all items require visual perception, organization, and synthesis of visual spatial information. Higher scores indicate better function. | Fiatarone Singh et al 2014 |
| COWAT                              | EXE    | Combined Oral Word Association Test is a language-based task assessing association fluency, and is often used as a measure of executive functioning. The most commonly used letters are F, A, and S. or C, F, and L, based upon word prevalence rates. Higher scores indicate better function.                                                                                                           | Fiatarone Singh et al 2014 |
| SDMT (Attention/speed)             | EXE    | Symbol Digit Modalities Test measures divided attention, visual scanning, tracking, and motor speed. It uses a substitution format presenting symbols with matching numbers, and participants are required to provide name the numbers corresponding to each given symbol. Higher scores indicate better function.                                                                                       | Fiatarone Singh et al 2014 |

Notes: General cognition (GEN COG), episodic memory (MEM), working memory (WM), executive function (EXE)

## Supplementary Appendix 1

### Statistical methods

#### Effect size calculation

Effect sizes were calculated using RevMan software version 5.3. Standardised mean differences were calculated using Hedges' adjusted  $g^1$ . Pre-intervention standard deviations were used as these are most likely to be comparable across studies and therefore provide the most accurate estimate of effect size.<sup>3</sup>

The Hedges' adjusted  $g$  formula used in RevMan is as follows:

$$g = [M_{\text{post intervention}} - M_{\text{post control}} / SD_{\text{pre-pooled}}] * [1 - 3 / (4N - 9)]$$

Where  $N = n_{\text{intervention group}} + n_{\text{control group}}$

and

$$SD_{\text{pre-pooled}} = \sqrt{[(n_{\text{intervention-1}}) SD_{\text{pre intervention}}^2 + (n_{\text{control-1}}) SD_{\text{pre control}}^2] / N - 2}$$

## Meta-analyses

Meta-analyses were performed using RevMan software version 5.3. A random effects method as described by DeSirmonian and Laird<sup>4</sup> was used, adjusting standard errors of the effect sizes in each study to account for the heterogeneity for intervention effects observed between different studies.

The pooled effect size of each meta-analysis was calculated by attributing a weight to the average effect size in each study according to sample size. The z statistic was used to evaluate whether the pooled effect size was significantly different to no effect.

Heterogeneity was quantified using the  $I^2$  statistic.

## Composite measure calculation

Composite scores were calculated where a study reported multiple outcomes falling within a particular outcome domain (e.g. objective cognitive performance). This approach was pragmatic in allowing one score to represent each intervention in the meta-analysis regardless of the number of outcomes reported. In turn this prevents more weight being given to studies with multiple outcomes.<sup>2</sup> The variance of the sum of variables was calculated as described below.

Using the example of a study with two relevant outcomes, there will be two effect sizes, namely  $y_1$  and  $y_2$ . The overall mean effect size for the composite measure will be:

1  
2  
3  $\bar{y} = 1/2(y_1 + y_2)$   
4  
5

6 The variance of this mean is calculated as follows:  
7

8  
9  $V_{\bar{y}} = \frac{1}{4} (V_{y_1} + V_{y_2} + 2r\sqrt{V_{y_1}}\sqrt{V_{y_2}}),$   
10  
11

12 where r is the correlation coefficient describing to what extent  $y_1$  and  $y_2$  co-vary.  
13  
14

15 If the correlation is set at 0, the outcomes are essentially treated as independent of each other and if the correlation is set at 1, the variance is  
16 an average of each outcome's variance. The former will lead to an underestimate of the variance and overestimate of precision while the latter  
17 will have the opposite effect. Consequently, in the absence of existing literature to identify a suitable correlation, we reported composite effect  
18 sizes calculated using a correlation of 0.5.  
19  
20  
21  
22  
23  
24  
25  
26  
27  
28

- 29  
30 1. Hedges LV, Olkin I. Statistical methods for meta-analysis. New York, Academic Press 1985.  
31  
32 2. Borenstein M, Hedges LV, Higgins JPT, et al. Introduction to Meta-Analysis. Chichester, John Wiley & Sons, Ltd 2009.  
33  
34 3. Morris S. Estimating Effect Sizes From Pretest-Posttest-Control Group Designs. Organ. Res. Meth 2008;11 (2):364-386.  
35  
36  
37 4. DerSimonian R, Laird N. Meta-analysis in clinical trials. Control Clin Trials 1986; 7(3):177-188  
38  
39  
40  
41  
42



PRISMA checklist

| Section/topic                    | Checklist item                                                                                                                                                                                                                                                                                              | Page number/<br>Figure/Table |
|----------------------------------|-------------------------------------------------------------------------------------------------------------------------------------------------------------------------------------------------------------------------------------------------------------------------------------------------------------|------------------------------|
| <b>Title</b>                     |                                                                                                                                                                                                                                                                                                             |                              |
| <b>Title</b>                     | Identify the report as a systematic review, meta-analysis, or both.                                                                                                                                                                                                                                         | <b>1</b>                     |
| <b>Abstract</b>                  |                                                                                                                                                                                                                                                                                                             |                              |
| <b>Structured summary</b>        | Provide a structured summary including, as applicable: background; objectives; data sources; study eligibility criteria, participants, and interventions; study appraisal and synthesis methods; results; limitations; conclusions and implications of key findings; systematic review registration number. | <b>2-3</b>                   |
| <b>Introduction</b>              |                                                                                                                                                                                                                                                                                                             |                              |
| <b>Rationale</b>                 | Describe the rationale for the review in the context of what is already known.                                                                                                                                                                                                                              | <b>4-6</b>                   |
| <b>Objectives</b>                | Provide an explicit statement of questions being addressed with reference to participants, interventions, comparisons, outcomes, and study design (PICOS).                                                                                                                                                  | <b>6</b>                     |
| <b>Methods</b>                   |                                                                                                                                                                                                                                                                                                             |                              |
| <b>Protocol and registration</b> | Indicate if a review protocol exists, if and where it can be accessed (e.g., Web address), and, if available, provide registration information including registration number.                                                                                                                               | <b>n/a</b>                   |
| <b>Eligibility criteria</b>      | Specify study characteristics (e.g., PICOS, length of follow-up) and report characteristics (e.g., years considered, language, publication status) used as criteria for eligibility, giving rationale.                                                                                                      | <b>8</b>                     |
| <b>Information sources</b>       | Describe all information sources (e.g., databases with dates of coverage, contact with study authors to identify additional studies) in the search and date last searched.                                                                                                                                  | <b>8</b>                     |
| <b>Search</b>                    | Present full electronic search strategy for at least one database, including any limits used, such that it could be repeated.                                                                                                                                                                               | <b>Supplementary</b>         |

| Section/topic                             | Checklist item                                                                                                                                                                                                         | Page number/<br>Figure/Table |
|-------------------------------------------|------------------------------------------------------------------------------------------------------------------------------------------------------------------------------------------------------------------------|------------------------------|
| <b>Table 1</b>                            |                                                                                                                                                                                                                        |                              |
| <b>Study selection</b>                    | State the process for selecting studies (i.e., screening, eligibility, included in systematic review, and, if applicable, included in the meta-analysis).                                                              | 9                            |
| <b>Data collection process</b>            | Describe method of data extraction from reports (e.g., piloted forms, independently, in duplicate) and any processes for obtaining and confirming data from investigators.                                             | 9                            |
| <b>Data items</b>                         | List and define all variables for which data were sought (e.g., PICOS, funding sources) and any assumptions and simplifications made.                                                                                  | n/a                          |
| <b>Risk of bias in individual studies</b> | Describe methods used for assessing risk of bias of individual studies (including specification of whether this was done at the study or outcome level), and how this information is to be used in any data synthesis. | 9                            |
| <b>Summary measures</b>                   | State the principal summary measures (e.g., risk ratio, difference in means).                                                                                                                                          | 9                            |
| <b>Synthesis of results</b>               | Describe the methods of handling data and combining results of studies, if done, including measures of consistency (e.g., $I^2$ ) for each meta-analysis.                                                              | 9                            |
| <b>Risk of bias across studies</b>        | Specify any assessment of risk of bias that may affect the cumulative evidence (e.g., publication bias, selective reporting within studies).                                                                           | 9                            |
| <b>Additional analyses</b>                | Describe methods of additional analyses (e.g., sensitivity or subgroup analyses, meta-regression), if done, indicating which were pre-specified.                                                                       | 10                           |
| <b>Results</b>                            |                                                                                                                                                                                                                        |                              |
| <b>Study selection</b>                    | Give numbers of studies screened, assessed for eligibility, and included in the review, with reasons for exclusions at each stage, ideally with a flow diagram.                                                        | Figure 1                     |

| Section/topic                        | Checklist item                                                                                                                                                                                           | Page number/<br>Figure/Table   |
|--------------------------------------|----------------------------------------------------------------------------------------------------------------------------------------------------------------------------------------------------------|--------------------------------|
| <b>Study characteristics</b>         | For each study, present characteristics for which data were extracted (e.g., study size, PICOS, follow-up period) and provide the citations.                                                             | <b>Table 1</b><br><b>11-12</b> |
| <b>Risk of bias within studies</b>   | Present data on risk of bias of each study and, if available, any outcome level assessment (see item 12).                                                                                                | <b>Supplementary Figure 1</b>  |
| <b>Results of individual studies</b> | For all outcomes considered (benefits or harms), present, for each study: (a) simple summary data for each intervention group (b) effect estimates and confidence intervals, ideally with a forest plot. | <b>Figs 2-3</b>                |
| <b>Synthesis of results</b>          | Present results of each meta-analysis done, including confidence intervals and measures of consistency.                                                                                                  | <b>13-14</b>                   |
| <b>Risk of bias across studies</b>   | Present results of any assessment of risk of bias across studies (see Item 15).                                                                                                                          | <b>Supplementary Figure 1</b>  |
| <b>Additional analysis</b>           | Give results of additional analyses, if done (e.g., sensitivity or subgroup analyses, meta-regression [see Item 16]).                                                                                    | <b>13-14</b>                   |
| <b>Discussion</b>                    |                                                                                                                                                                                                          |                                |
| <b>Summary of evidence</b>           | Summarize the main findings including the strength of evidence for each main outcome; consider their relevance to key groups (e.g., healthcare providers, users, and policy makers).                     | <b>16</b>                      |
| <b>Limitations</b>                   | Discuss limitations at study and outcome level (e.g., risk of bias), and at review-level (e.g., incomplete retrieval of identified research, reporting bias).                                            | <b>16-17</b>                   |
| <b>Conclusions</b>                   | Provide a general interpretation of the results in the context of other evidence, and implications for future research.                                                                                  | <b>19</b>                      |
| <b>Funding</b>                       |                                                                                                                                                                                                          |                                |
| <b>Funding</b>                       | <b>Describe sources of funding for the systematic review and other support (e.g., supply of data); role of funders for the</b>                                                                           | <b>n/a</b>                     |

| Section/topic | Checklist item            | Page number/<br>Figure/Table |
|---------------|---------------------------|------------------------------|
|               | <b>systematic review.</b> |                              |

For peer review only

# BMJ Open

## The effect of Computerized Cognitive Training on cognitive outcomes in Mild Cognitive Impairment: A Systematic Review and Meta-Analysis

|                                 |                                                                                                                                                                                                                                                                                                                                                                                                                                                                                                                                                                                                                                                                                                                                                                                                                                                                                                                                                                                                                                                                                                                                                                                                                                                                                                                                        |
|---------------------------------|----------------------------------------------------------------------------------------------------------------------------------------------------------------------------------------------------------------------------------------------------------------------------------------------------------------------------------------------------------------------------------------------------------------------------------------------------------------------------------------------------------------------------------------------------------------------------------------------------------------------------------------------------------------------------------------------------------------------------------------------------------------------------------------------------------------------------------------------------------------------------------------------------------------------------------------------------------------------------------------------------------------------------------------------------------------------------------------------------------------------------------------------------------------------------------------------------------------------------------------------------------------------------------------------------------------------------------------|
| Journal:                        | <i>BMJ Open</i>                                                                                                                                                                                                                                                                                                                                                                                                                                                                                                                                                                                                                                                                                                                                                                                                                                                                                                                                                                                                                                                                                                                                                                                                                                                                                                                        |
| Manuscript ID                   | bmjopen-2018-027062.R1                                                                                                                                                                                                                                                                                                                                                                                                                                                                                                                                                                                                                                                                                                                                                                                                                                                                                                                                                                                                                                                                                                                                                                                                                                                                                                                 |
| Article Type:                   | Research                                                                                                                                                                                                                                                                                                                                                                                                                                                                                                                                                                                                                                                                                                                                                                                                                                                                                                                                                                                                                                                                                                                                                                                                                                                                                                                               |
| Date Submitted by the Author:   | 03-Apr-2019                                                                                                                                                                                                                                                                                                                                                                                                                                                                                                                                                                                                                                                                                                                                                                                                                                                                                                                                                                                                                                                                                                                                                                                                                                                                                                                            |
| Complete List of Authors:       | Zhang, Haifeng; University College London Division of Psychiatry; Peking University Sixth Hospital, Peking University Institute of Mental Health, NHC Key Laboratory of Mental Health (Peking University), National Clinical Research Center for Mental Disorders (Peking University Sixth Hospital), Beijing Dementia Key Lab<br>Huntley, Jonathan; University College London, Division of Psychiatry<br>Bhome, Rohan; University College London, Division of Psychiatry<br>Holmes, Benjamin; University College London Division of Psychiatry<br>Cahill, Jack; Institute of Psychiatry, Psychology and Neuroscience. King's College London<br>Gould, Rebecca; University College London Division of Psychiatry<br>Wang, Huali; Peking University Sixth Hospital, Peking University Institute of Mental Health, NHC Key Laboratory of Mental Health (Peking University), National Clinical Research Center for Mental Disorders (Peking University Sixth Hospital), Beijing Dementia Key Lab<br>Yu, Xin; Peking University Sixth Hospital, Peking University Institute of Mental Health, NHC Key Laboratory of Mental Health (Peking University), National Clinical Research Center for Mental Disorders (Peking University Sixth Hospital), Beijing Dementia Key Lab<br>Howard, R; University College London Division of Psychiatry, |
| <b>Primary Subject Heading</b>: | Mental health                                                                                                                                                                                                                                                                                                                                                                                                                                                                                                                                                                                                                                                                                                                                                                                                                                                                                                                                                                                                                                                                                                                                                                                                                                                                                                                          |
| Secondary Subject Heading:      | Mental health                                                                                                                                                                                                                                                                                                                                                                                                                                                                                                                                                                                                                                                                                                                                                                                                                                                                                                                                                                                                                                                                                                                                                                                                                                                                                                                          |
| Keywords:                       | Mild cognitive training (MCI), computerised, cognitive training, cognitive outcomes, meta-analysis                                                                                                                                                                                                                                                                                                                                                                                                                                                                                                                                                                                                                                                                                                                                                                                                                                                                                                                                                                                                                                                                                                                                                                                                                                     |
|                                 |                                                                                                                                                                                                                                                                                                                                                                                                                                                                                                                                                                                                                                                                                                                                                                                                                                                                                                                                                                                                                                                                                                                                                                                                                                                                                                                                        |

SCHOLARONE™  
Manuscripts

# The effect of Computerized Cognitive Training on cognitive outcomes in Mild Cognitive Impairment: A Systematic Review and Meta-Analysis

Haifeng Zhang<sup>1,3</sup>, J. D. Huntley<sup>1</sup>, R. Bhome<sup>1</sup>, B. Holmes<sup>1</sup>, J.T. Cahill<sup>2</sup>, R.L. Gould<sup>1</sup>, Huali Wang<sup>3</sup>,  
Xin Yu<sup>3</sup> and R. J. Howard<sup>1</sup>

1. Division of Psychiatry, University College London, London W1T 7NF, United Kingdom

2. Institute of Psychiatry, Psychology and Neuroscience, King's College London, London SE5 8AF, United Kingdom

3. Peking University Sixth Hospital, Peking University Institute of Mental Health, NHC Key Laboratory of Mental Health (Peking University), National Clinical Research Center for Mental Disorders (Peking University Sixth Hospital), Beijing Dementia Key Lab, Beijing 100191, China

## \* Address correspondence

Dr. Huntley: [j.huntley@ucl.ac.uk](mailto:j.huntley@ucl.ac.uk)

6th Floor Maple House, 149 Tottenham Court Road, London W1T 7NF,  
University College London, United Kingdom.

**Running title:** A meta-analysis of computerised cognitive training in MCI

**Key words:** Mild cognitive training (MCI), computerised, cognitive training, cognitive outcomes, meta-analysis.

**Word count:** 4050

1  
2  
3 **23 Abstract:**  
4  
5

6 **24 Objectives** To determine the effect of computerised cognitive training (CCT) on improving cognitive  
7  
8 **25** function for older adults with mild cognitive impairment (MCI).  
9

10  
11 **26 Design** Systematic review and meta-analysis.  
12

13  
14 **27 Data Sources** PubMed, Embase, Web of Science and the Cochrane Library were searched through  
15  
16 **28** January 2018.  
17

18  
19 **29 Eligibility Criteria** Randomised controlled trials (RCTs) comparing CCT with control conditions in  
20  
21 **30** those with MCI aged 55+ were included.  
22

23  
24 **31 Data extraction and synthesis** Two independent reviewers extracted data and assessed the risk of  
25  
26 **32** bias. Effect sizes (Hedges'  $g$  and 95% CIs) were calculated and random effects meta-analyses were  
27  
28 **33** performed where three or more studies investigated a comparable intervention and outcome.  
29  
30 **34** Heterogeneity was quantified using the  $I^2$  statistic.  
31  
32

33  
34 **35 Results** 18 studies met the inclusion criteria and were included in the analyses, involving 690  
35  
36 **36** participants. Meta-analysis revealed small to moderate positive treatment effects compared to  
37  
38 **37** control interventions in 4 domains as follows: Global Cognitive Function ( $g = 0.23$ , 95% CI = 0.03,  
39  
40 **38** 0.44), Memory ( $g = 0.30$ , 95% CI = 0.11, 0.50), Working Memory ( $g = 0.39$ , 95% CI = 0.12, 0.66) and  
41  
42 **39** Executive function ( $g = 0.20$ , 95% CI = -0.03, 0.43). Statistical significance was reached in all domains  
43  
44 **40** apart from executive function.  
45  
46

47  
48 **41 Conclusions** This meta-analysis provides evidence that CCT improves cognitive function in older  
49  
50 **42** people with MCI. However, the long-term transfer of these improvements and the potential to  
51  
52 **43** reduce dementia prevalence remains unknown. Various methodological issues such as  
53  
54 **44** heterogeneity in outcome measures, interventions and MCI symptoms and lack of intention-to-treat  
55  
56 **45** (ITT) analyses limit the quality of the literature and represent areas for future research.  
57  
58  
59  
60

1  
2  
3 47 **Strengths and limitations of this study**  
4  
5

- 6 48 1. This is a comprehensive systematic review and meta-analysis evaluating the effects of  
7  
8 49 computerised cognitive training in older adults with mild cognitive impairment on cognitive  
9  
10 50 outcomes.  
11  
12 51 2. We excluded studies that did not utilise strict clinical diagnostic criteria for MCI to reduce the  
13  
14 52 heterogeneity often found between participants in MCI studies.  
15  
16 53 3. Data for four main cognitive domains most significantly affected by MCI and targeted by  
17  
18 54 cognitive interventions were extracted from individual studies (global cognitive function,  
19  
20 55 episodic memory, working memory and executive function) and where appropriate composite  
21  
22 56 measures were calculated for meta-analyses.  
23  
24 57 4. The studies included in the systematic review are generally of moderate quality, however  
25  
26 58 several methodological issues may limit the interpretation of results.  
27  
28 59 5. A lack of follow up data makes it impossible to draw conclusions regarding long term effects or  
29  
30 60 impact on the prevalence of dementia.  
31  
32  
33  
34  
35  
36  
37  
38  
39  
40  
41  
42  
43  
44  
45  
46  
47  
48  
49  
50  
51  
52  
53  
54  
55  
56  
57  
58  
59  
60



## 62 INTRODUCTION

63 There are currently estimated to be over 46 million people worldwide living with dementia. This  
64 number is expected to grow to approximately 131.5 million by 2050.<sup>1</sup> There is therefore an urgent  
65 need to develop therapeutic treatments that may delay or prevent dementia in population groups  
66 considered 'at risk'.<sup>2</sup> Interventions that delay the onset of AD by an average of two years would  
67 decrease the worldwide prevalence rate by 22.8 million cases,<sup>3</sup> which in turn, would ease the huge  
68 burden placed on individuals, families and society. For these reasons, evidence-based interventions  
69 that reduce the risk of dementia are urgently required.

70 Mild Cognitive Impairment (MCI) refers to an intermediate stage between normal age-related  
71 cognitive decline (ARCD) and dementia.<sup>4</sup> Although many older adults experience a degree of  
72 deterioration in cognitive performance, MCI is described as a greater than the expected cognitive  
73 decline for an individual's age and education, but without notable interference in everyday  
74 functioning.<sup>5</sup> Within the older adult population, the estimated prevalence rate of MCI ranges from  
75 15-20%.<sup>6</sup> Although MCI can present with a variety of symptoms, when memory loss is the  
76 predominant symptom it is termed "amnesic MCI" and is frequently seen as a prodromal stage of  
77 Alzheimer's disease.<sup>6</sup> When individuals have impairments in domains other than memory it is  
78 classified as non-amnesic single- or multiple-domain MCI and these individuals are believed to be  
79 more likely to convert to other types of dementia.<sup>6</sup>

80 The lack of therapeutic benefit or delay in progression from MCI to AD with pharmacological  
81 interventions has meant that the focus has shifted towards non-pharmacological interventions.<sup>7</sup>

82 Cognitive remediation is the term used for interventions designed to mediate cognitive decline and  
83 can be typically identified as involving one of three different approaches: cognitive stimulation (CS),  
84 cognitive rehabilitation (CR) and cognitive training (CT). Interventions based on CS and CR are more  
85 focused on individuals with established dementia, often with the aim of overcoming specific  
86 difficulties with daily living and improving general quality of life. In comparison, CT can be used for

1  
2  
3 87 subjects without significant cognitive or functional difficulties, and is therefore well suited for  
4  
5 88 individuals with MCI.  
6  
7

8 89 CT refers to interventions that aim to improve cognitive domains through repeated practice on  
9  
10 90 theoretically driven skills and strategies.<sup>8</sup> Each CT exercise aims to target one or two specific  
11  
12 91 domains in an adaptive manner with a possibility of transfer effects whereby performance in other  
13  
14 92 untrained cognitive domains is also improved.<sup>9</sup>  
15  
16

17 93 Computerised cognitive training (CCT) utilises computers for the delivery of the intervention and  
18  
19 94 differs from traditional CT, which usually incorporates face-to-face contact with a professional and  
20  
21 95 paper-and-pencil paradigms.<sup>8</sup> CCT has several advantages including cost-effectiveness, increased  
22  
23 96 accessibility and ability to customise the content and difficulty of the training.<sup>10-12</sup> Research involving  
24  
25 97 older adults has found that CCT programs are associated with high satisfaction levels, and that they  
26  
27 98 are also a feasible option for individuals with MCI, with equal or better adherence rates when  
28  
29 99 compared to traditional CT.<sup>10-13</sup> In addition, evidence suggests that studies utilising CCT show a  
30  
31 100 pattern of stronger effect sizes and enhanced generalisation of benefits compared to traditional  
32  
33 101 strategy training in MCI.<sup>14</sup> A previous meta-analysis found that CT is not effective in people with  
34  
35 102 established dementia.<sup>15</sup> However, there is growing interest as to whether CCT has the potential to  
36  
37 103 prevent or slow the progression from MCI to dementia particularly given the association between  
38  
39 104 higher participation in mental activity and reduced dementia risk.<sup>16</sup>  
40  
41  
42  
43

44 105 Studies investigating the effectiveness of CT in improving cognitive performance in people with MCI  
45  
46 106 have demonstrated small to moderate improvement but existing research suffers from  
47  
48 107 methodological concerns and limitations.<sup>14-17-19</sup> CT research in individuals with MCI has been  
49  
50 108 criticised for the failure to include an appropriate control group,<sup>20-22</sup> use of subsets of participants  
51  
52 109 from previous studies,<sup>23</sup> and pooling of MCI data with that from non-impaired adults<sup>24</sup> as well as  
53  
54 110 those with probable AD.<sup>25-27</sup> Another issue raised in treatment studies has been the use of  
55  
56 111 ecologically valid outcome measures. For example, the inclusion of functional outcome measures is  
57  
58 112 important to monitor progression from MCI to dementia but given that individuals with MCI are, by  
59  
60

1  
2  
3 113 definition, not significantly impaired in functioning, it is a challenge to measure the functional effects  
4  
5 114 of the intervention.<sup>17</sup>  
6  
7

8 115 CCT is far from a single construct and factors such as the content, platform, context and dose of  
9  
10 116 training may differ.<sup>28</sup> Unfortunately, despite increasing scientific scrutiny, there is a limited  
11  
12 117 understanding as to which, if any, dimensions are associated with cognitive benefit. Ideally, critical  
13  
14 118 analysis of research using CCT for MCI would reveal insight into which specific components of CCT  
15  
16 119 are necessary for it to be effective, however, it is important to establish the overall effect of CCT on  
17  
18 120 individuals with MCI.  
19  
20  
21

22 121 Systematic reviews and meta-analyses of cognitive interventions in MCI have reported mixed results,  
23  
24 122<sup>19 29-34</sup> and when exploring the effect of cognitive training in MCI have largely not distinguished  
25  
26 123 between studies evaluating computerised and non-computerised training. This makes it difficult to  
27  
28 124 draw conclusions, specifically on the efficacy of CCT in MCI. For example, a systematic review by Ge  
29  
30 125 et al summarised the findings of CCT studies among people with MCI, however no meta-analyses  
31  
32 126 were performed and the review included non-randomized controlled studies, studies that combined  
33  
34 127 CCT with other interventions and studies not using Petersen's core MCI diagnosis criteria, making it  
35  
36 128 challenging to draw rigorous conclusions.<sup>35</sup> A previous meta-analysis by Hill et al (2017) specially  
37  
38 129 explored the effectiveness of CCT in MCI on cognition and behavioural outcomes,<sup>32</sup> however the  
39  
40 130 field is progressing rapidly, as highlighted by Ge et al's observation that 42% of the studies in their  
41  
42 131 review were published between 2016 and 2017,<sup>35</sup> and further relevant studies have been published  
43  
44 132 subsequently.<sup>32 36-38</sup> Another more recently published meta-analysis by Gates et al only included  
45  
46 133 studies where the intervention period lasted for more than 12 weeks and excluded a significant  
47  
48 134 number of studies with shorter training duration.<sup>39</sup> Thus, it is necessary to conduct an updated  
49  
50 135 meta-analysis to include more recent articles and all intervention durations.  
51  
52  
53  
54  
55  
56  
57  
58  
59  
60

1  
2  
3 137 This paper investigates the effect of CCT on improving cognitive outcomes in individuals diagnosed  
4  
5 138 with MCI using random effects meta-analyses. To address some of the problems identified in the  
6  
7 139 literature, only peer-reviewed Randomised controlled trials (RCTs) were selected and cognitive  
8  
9  
10 140 outcome measures were extracted for analysis. Variables that may moderate the effect of CCT, such  
11  
12 141 as the type of programme or dose of the intervention, were reviewed. The purpose of the current  
13  
14 142 review was to: a) evaluate the effect of CCT in older adults with MCI on cognitive outcomes; b)  
15  
16 143 evaluate the content and methodological quality of the intervention studies; and c) suggest future  
17  
18  
19 144 directions in CCT research in this group based on findings.  
20  
21  
22 145

## 146 MATERIALS AND METHODS

### 147 Search strategy and selection criteria

148 A literature search was completed during January 2018 of four online literature databases and trial  
149 registers: PubMed, Embase, Web of Science and Cochrane library. The search terms are shown in  
150 supplementary table 1. Previous meta-analyses and systematic reviews of cognitive interventions in  
151 MCI were also searched. Furthermore, reference lists of included studies were manually scanned for  
152 additional relevant papers.

### 153 Inclusion and exclusion criteria

154 Types of studies: Published, peer-reviewed studies with an RCT design investigating the use of CCT  
155 interventions in older people with MCI were considered for inclusion. Studies were included if  
156 sufficient data were available for calculation of effect sizes in each treatment arm (unavailable  
157 information was requested from authors and included if obtained). The date of publication was not  
158 limited, but only studies published in English were included.

159 Participants: Inclusion criteria were a mean age of participants greater than 55 years, a diagnosis of  
160 MCI using core criteria according to Petersen<sup>4</sup> and no other psychiatric diagnosis or neurological  
161 disorder. The number of participants in each arm needed to be at least five. Studies with  
162 non-impaired older people or those with probable AD were excluded unless separate data for  
163 participants with MCI was provided.

164 Types of interventions: Studies were included if they compared any CCT intervention, administered  
165 on a personal computer or gaming console, to an active or non-active control. Computerised training  
166 had to represent the primary intervention, not simply one of multiple broader non-computerised  
167 cognitive interventions, in order to be included. Active controls were classified as interventions that  
168 controlled for non-specific therapeutic effects, whereas non-active control groups included waiting  
169 list conditions, treatment as usual (TAU) or a non-matched minimal intervention. Each study was

1  
2  
3 170 independently screened, selected for inclusion and its data extracted by independent researchers.

4  
5 171 Any disagreements were resolved through discussion with another author.

6  
7  
8 172 Types of outcome measures: We focused on cognitive domains that are reported to be most  
9  
10 173 significantly affected by MCI and targeted by cognitive interventions, namely episodic memory,  
11  
12 174 executive function, working memory/attention and general cognitive function.<sup>40</sup> Available data from  
13  
14 175 all relevant cognitive outcomes was extracted. Cognitive outcomes used in the included studies and  
15  
16 176 their classification into the main cognitive domains are shown in supplementary table 2.

### 17 177 **Risk of bias assessment**

18  
19  
20 178 The Cochrane Collaboration Risk of Bias tool was used to assess study methodological quality<sup>41</sup>. Risk  
21  
22 179 of bias was assessed in multiple domains: sequence generation, allocation concealment, blinding of  
23  
24 180 participants and investigators, incomplete outcome data and selective reporting of outcomes. In  
25  
26 181 each of these categories, the methodological quality of each assessed domain was rated as 'low risk',  
27  
28 182 'unclear' or 'high risk'. Studies were excluded if unsure or high risk in all assessed domains.

### 29 183 **Statistical analysis**

30  
31  
32 184 Intervention and control groups' post-intervention outcome scores were compared using Review  
33  
34 185 Manager (RevMan) software version 5.3. The programme uses Hedges' adjusted  $g$ <sup>42</sup> to calculate a  
35  
36 186 standardised mean difference (SMD) which is adjusted for small sample bias. Pooling of standardized  
37  
38 187 mean Hedges'  $g$  estimates of  $<0.30$ ,  $\geq 0.30$  and  $< 0.60$ , and  $\geq 0.60$  were considered small, moderate,  
39  
40 188 and large, respectively. Meta-analyses were performed where three or more studies investigated a  
41  
42 189 comparable intervention and outcome using a random effects model. Heterogeneity was quantified  
43  
44 190 using the  $I^2$  statistic, considered as low, moderate, or large when at 25%, 50%, or 75%, respectively.

45  
46 191<sup>43</sup> Where a study reported multiple outcome measures for one cognitive domain (e.g., within  
47  
48 192 memory function), a composite measure was calculated to provide a single quantitative measure for  
49  
50 193 meta-analysis.<sup>44</sup> Publication bias was examined using funnel plots. We also performed subgroup

1  
2  
3 194 analysis and meta-regression using the "metafor" program in R (<https://www.R-project.org/>), for  
4  
5 195 example we compared the effectiveness of single and multi-domain training. Furthermore, we  
6  
7 196 subgrouped studies with a training dose of less than 10 hours and more than 30 hours to see if there  
8  
9  
10 197 is a dose-response correlation. We also compared studies with active vs. non-active control  
11  
12 198 conditions, following a reviewer's suggestion. Sensitivity analyses were performed to identify  
13  
14 199 potential sources of heterogeneity. Further details of statistical methods are found in the  
15  
16 200 supplementary material (see supplementary appendix 1).  
17  
18

19 201 **Patient and public involvement**  
20

21  
22 202 There was no direct patient or public involvement in this review.  
23  
24

25 203  
26  
27  
28  
29  
30  
31  
32  
33  
34  
35  
36  
37  
38  
39  
40  
41  
42  
43  
44  
45  
46  
47  
48  
49  
50  
51  
52  
53  
54  
55  
56  
57  
58  
59  
60

204

**RESULTS****Description of studies**

The Preferred reporting items for systematic reviews and meta-analyses (PRISMA) checklist was used to guide reporting of results.<sup>45</sup>

Following the initial literature review a total of 8893 studies were found. Of these 8875 were excluded and 18 studies met inclusion criteria. Figure 1 presents a flowchart of study selection. The total number of participants included was 690 and the brief summary characteristics of each study are presented in table 1 and detailed in supplementary table 3. Sample sizes ranged from 12 to 106, and dropout rates ranged from 0% to 32%. One study was excluded from the meta-analysis because of suspected inclusion of participants with probable AD based on the reported average Mini-Mental State Examination (MMSE) score.<sup>46</sup> Another two studies were excluded from the meta-analysis as post-intervention cognitive data could not be obtained.<sup>47 48</sup>

Thirteen studies reported outcomes assessing memory, five studies reported outcomes assessing working memory, 11 studies reported outcomes assessing executive function, and 11 studies reported global cognitive functioning outcomes (see table 2.).

**Quality of studies**

The quality of each study was evaluated in regard to certain methodological aspects and summarised in supplementary figure 1. 11 of the 18 studies did not report blinding of participants.

**Participant characteristics**

The total number of participants from all studies included was 690 (CCT: n=351, mean group size: n=20, control: n=339, mean group size: n=19). The average age of participants in both conditions was 73.4 years. 52.5% of all participants were male. The disparity and lack of reporting of the ratio of



1  
2  
3 227 participants' years of education precluded mean calculations, although the available data suggests  
4  
5 228 most participants had at least secondary school education. The pooled average baseline score for  
6  
7 229 the MMSE was 26.9 in both groups, although the range of scores indicated heterogeneity within  
8  
9  
10 230 participants.

### 11 12 13 231 **Cognitive Training Interventions**

14  
15  
16 232 Interventions were mostly delivered on a personal computer (PC), using commercially available or  
17  
18 233 purpose built CT packages, with two studies utilising a video game on a games console. <sup>13 38</sup> All  
19  
20 234 interventions were specifically designed to improve various aspects of cognition. The most common  
21  
22 235 type of intervention used was multi-domain (11/18 studies), where the programme targeted two or  
23  
24 236 more cognitive domains. In the seven single domain intervention studies, three evaluated memory  
25  
26 237 training and executive function training while one used working memory training. The dose and  
27  
28 238 duration of the CT intervention was variable, with the total length of training ranging from 4 hours <sup>49</sup>  
29  
30 239 to 80 hours <sup>50</sup> and the duration of training from 2 weeks<sup>51</sup> to 26 weeks. <sup>50</sup>

### 31 32 33 34 240 **Outcome Measures**

35  
36  
37 241 Supplementary Table 2 summarises the 60 different cognitive outcome measures used by studies  
38  
39 242 included in the meta-analyses. A considerable variability in measures reported was also noted; only  
40  
41 243 three outcome measures were reported three or more times; seven studies used the MMSE as a  
42  
43 244 measure of global cognition, three studies used Paired-associates learning (PAL) to measure memory  
44  
45 245 and in four studies used the Trail Making Test (TMT) as a measure of executive function.

### 46 47 48 49 246 **Meta-analysis of specific outcomes**

50  
51  
52 247 Separate meta-analyses were conducted on four different cognitive domains. The most commonly  
53  
54 248 tested domains were memory, with thirteen studies exploring this domain. The results of the  
55  
56 249 meta-analyses are presented in table 2.

57  
58  
59  
60 250 Global Cognition function

1  
2  
3 251 Overall, there was a significant benefit of CCT on global cognition compared to the control group.  
4  
5 252 The meta-analysis revealed a small but statistically significant pooled effect size of 0.23 (95% CI [0.03,  
6  
7 253 0.44],  $z = 2.22$ ,  $p = 0.03$ ) with low heterogeneity between studies ( $I^2 = 6\%$ ) (see figure 2.). The funnel  
8  
9 254 plot did not reveal significant asymmetry (see supplementary figure 2.). The effect size across  
10  
11 255 active-controlled trials ( $n=7$ ,  $g=0.23$ , 95% CI [-0.05, 0.51],  $I^2=27\%$ ) was smaller than that of trials with  
12  
13 256 non-active control groups ( $n=4$ ,  $g=0.31$ , 95% CI [-0.06, 0.68],  $I^2=0\%$ ) (see supplementary figure 3-4.),  
14  
15 257 but was not statistically significantly different ( $z = -0.11$ ,  $p = 0.91$ ).  
16  
17  
18

258

## 259 Memory

22  
23 260 The pooled effect size of CCT on memory outcomes, when compared with control conditions, was  
24  
25 261 moderate and statistically significant ( $g = 0.30$ , 95% CI = [0.11, 0.50],  $z = 3.03$ ,  $p = 0.002$ ), with  
26  
27 262 moderate heterogeneity between studies ( $I^2 = 46\%$ ) (see figure 3.). The funnel plot did not reveal  
28  
29 263 significant asymmetry (see supplementary figure 5.). The effect size across active-controlled trials  
30  
31 264 ( $n=8$ ,  $g=0.36$ , 95% CI [0.11, 0.61],  $I^2=52\%$ ) was larger than that of trials with passive control groups ( $n=5$ ,  
32  
33 265  $g=0.20$ , 95% CI [-0.14, 0.54],  $I^2=43\%$ ) (see supplementary figure 6-7.), but was not statistically  
34  
35 266 significantly different ( $z = -0.32$ ,  $p = 0.75$ ). However, there was moderate heterogeneity across  
36  
37 267 studies in both analyses.  
38  
39

40 268 Due to the moderate heterogeneity between studies, a sensitivity analysis was also conducted, in  
41  
42 269 which one study at a time was removed and the others analysed to estimate whether the results  
43  
44 270 could have been markedly affected by a single study. The combined Hedges'  $g$  were consistent and  
45  
46 271 without apparent fluctuation, with a range from 0.23 [0.07, 0.39] to 0.35[0.15, 0.55].  
47  
48

272

## 273 Working Memory

51  
52 274 The meta-analysis revealed a statistically significant moderate effect size of 0.39 in favour of CCT  
53  
54 275 compared with controls (95% CI [0.12, 0.66],  $z = 2.85$ ,  $p = 0.004$ ) with low heterogeneity between  
55  
56 276 studies ( $I^2 = 0\%$ ) (see figure 3.). The funnel plot did not reveal significant asymmetry (see  
57  
58  
59  
60

1  
2  
3 277 supplementary figure 5.). Due to there being fewer than three non-active we did not compare the  
4  
5 278 effect size between active-controlled trials and non-active trials.  
6

7  
8 279

9  
10 280 Executive function

11  
12 281 The overall effect of CCT on executive function compared with control conditions was small and  
13  
14 282 non-significant. The meta-analysis revealed a pooled effect size of 0.20 (95% CI [-0.03, 0.43],  $z = 1.74$ ,  
15  
16 283  $p = 0.08$ ) with high heterogeneity between studies ( $I^2 = 51%$ ) (see figure 3.). The funnel plot did not  
17  
18 284 reveal significant asymmetry (see supplementary figure 5.). The effect size across active-controlled  
19  
20 285 trials ( $n=7$ ,  $g=0.13$ , 95% CI [-0.08, 0.35],  $I^2=20%$ ) was smaller than for the non-active control groups  
21  
22 286 ( $n=4$ ,  $g=0.32$ , 95% CI [-0.23, 0.87],  $I^2=74%$ ) (see supplementary figure 8-9.), but was not statistically  
23  
24 287 significantly different ( $z = 0.95$ ,  $p = 0.35$ ).  
25  
26

27  
28 288 Considering the large heterogeneity between studies ( $I^2 = 51%$ ), a sensitivity analysis was also  
29  
30 289 conducted as described above. The combined Hedges'  $g$  were consistent and without apparent  
31  
32 290 fluctuation, with a range from 0.12 [-0.05, 0.28] to 0.35 [0.03, 0.48].  
33

34 291

35  
36 292 A priori subgroup analysis

37  
38  
39 293 A priori, we stipulated that meta-analysis would only be performed if three studies report outcomes  
40  
41 294 in the same cognitive domain and so subgroup analysis could only compare single and multi-domain  
42  
43 295 memory training. Similarly, only global cognition could be used for subgroup analysis to compare the  
44  
45 296 training interventions less than ten hours and more than thirty hours. Our subgroup analyses and  
46  
47 297 meta-regression suggested that there is no difference between multi-domain CCT and single-domain  
48  
49 298 CCT ( $z = 0.09$ ,  $p = 0.93$ ), although the former had a significant effect ( $g = 0.30$ , 95% CI (0.08, 0.53))  
50  
51 299 while the latter was non-significant ( $g = 0.31$ , 95% CI (-0.19, 0.81)) (see supplementary figure 10-11).  
52  
53  
54 300 There is also no clear evidence for a dose-response relationship. Our subgroup analysis found that  
55  
56 301 studies that provided more than 30 hours of CCT had a smaller overall effect on global cognitive  
57  
58 302 function ( $g = 0.20$ , 95% CI (-0.31, 0.71)) compared to studies providing less than 10 hours of CCT ( $g =$   
59  
60

1  
2  
3 303 0.30, 95% CI (-0.01, 0.61) (see supplementary figure 12-13). We did not perform a meta-regression  
4  
5 304 for training dose because fewer than ten studies were included. The subgroup analyses need to be  
6  
7 305 interpreted with caution due to the small number of studies and heterogeneity, however, they  
8  
9 306 illustrate the lack of clear factors that are associated with efficacy.  
10  
11  
12  
13  
14  
15  
16  
17  
18  
19  
20  
21  
22  
23  
24  
25  
26  
27  
28  
29  
30  
31  
32  
33  
34  
35  
36  
37  
38  
39  
40  
41  
42  
43  
44  
45  
46  
47  
48  
49  
50  
51  
52  
53  
54  
55  
56  
57  
58  
59  
60

For peer review only

## 307 DISCUSSION

### 308 Main findings

309 Based on results from 18 RCTs, it is likely that CCT is a viable intervention for improving cognition in  
310 older people with MCI. There were small to moderate positive effect sizes found in all domains, with  
311 statistical significance reached for global cognitive function ( $g=0.23$ , 95% CI = [0.03, 0.44]), memory  
312 ( $g=0.30$ , 95% CI=[0.11, 0.50]) and working memory ( $g=0.39$ , 95% CI=[0.12, 0.66]), but not executive  
313 function ( $g=0.20$ , 95% CI=[-0.03, 0.43]). The largest effect sizes were found for working memory and  
314 memory (although statistically significant heterogeneity was found for the latter domain). This is  
315 unsurprising given its central focus in most interventions and promising given this is the primary  
316 complaint in most cases of MCI.

317 The present meta-analyses updated the literature search and added eight new studies<sup>23 36-38</sup>  
318 <sup>51-54</sup>compared with the previous study conducted by Hill et al<sup>32</sup>. The present findings are largely in  
319 keeping with the results of Hill et al <sup>32</sup> that demonstrated positive effect sizes for global cognition  
320 ( $g=0.38$ , 95% CI=[0.14–0.62]), memory ( $g=0.42$ , 95% CI = [0.21, 0.63]), working memory ( $g=0.74$ , 95%  
321 CI =[0.32, 1.15]) and executive function ( $g=0.20$ , 95% CI=[-0.05, 0.44]). However, our results are in  
322 contrast with the results reported by Gates et al which found that there were no clear effects of CCT  
323 on cognition for people with MCI <sup>39</sup>. Methodological reasons for this inconsistency may be that Gates  
324 et al only included studies with a minimum intervention period of 12 weeks and included a broader  
325 range of participants at risk of cognitive decline. As a result, fewer studies (eight) met their eligibility  
326 criteria, of which two studies did not require a strict MCI diagnosis <sup>46 47</sup> and one used self or  
327 informant–reported cognitive complaints.<sup>55</sup>

328 The current meta-analysis employed strict eligibility criteria to overcome the methodological issues  
329 reported in the literature <sup>56 57</sup> such as inappropriate control groups and CCT being combined with  
330 other interventions. The combination of an overall large sample size (N=690) and stringent eligibility  
331 criteria make this meta-analysis a useful contribution to the growing evidence for the efficacy of CCT

1  
2  
3 332 in MCI. Nevertheless, various methodological issues were identified that limit the ability to make  
4  
5 333 recommendations for the optimal format, frequency or intensity of CCT. Further, the lack of  
6  
7 334 longitudinal studies make it unclear whether observed post-intervention benefits contribute in any  
8  
9  
10 335 way to the goal of delaying or preventing the progression from MCI to dementia.  
11

## 12 13 336 **Validity of observations and limitations**

### 14 15 16 337 **Sources of bias**

17  
18 338 Several methodological issues were identified. Studies were rarely double-blinded, and whilst it may  
19  
20 339 be considered impractical to blind therapists and participants given the nature of the intervention,  
21  
22 340 this nevertheless introduces the risk of expectation bias and exaggerated results. In addition, data  
23  
24 341 concerning dropouts were rarely included in the analyses and ITT analysis was only used in two  
25  
26 342 studies.<sup>49 58</sup> Whilst most of the remaining studies reported no significant differences at baseline for  
27  
28 343 those who dropped out, these differences may have only become apparent post-intervention, and  
29  
30 344 baseline differences may have been more obvious with the large number of participants in the  
31  
32 345 meta-analysis. Thus, the absence of ITT may have introduced an attrition bias.  
33  
34  
35

36  
37 346 Further bias may have arisen due to the decision in this study not to differentiate between amnesic  
38  
39 347 and non-amnesic forms of MCI. This classification is an example of the heterogeneity of MCI  
40  
41 348 symptoms. This heterogeneity is supported in descriptions by Petersen<sup>59</sup> and in the results of a  
42  
43 349 study revealing MCI as a highly nuanced and complex clinical entity.<sup>60</sup> This may lead to considerably  
44  
45 350 different intervention effects between participants and render it difficult to evaluate the efficacy of  
46  
47 351 the cognitive intervention and the generalisability of the current results.  
48  
49

50  
51 352 This meta-analysis calculated composite effect sizes when multiple outcome measures were  
52  
53 353 provided for the same domain in each study. Whilst this method maximises the amount of data  
54  
55 354 drawn from the reviewed studies, it also has certain limitations. Firstly, this approach necessitated  
56  
57 355 an arbitrary measure of correlation between outcome measures, in this case set at 0.5. This may be  
58  
59  
60

1  
2  
3 356 inaccurate, with outcome measures being more or less heterogeneous. Unfortunately, data on  
4  
5 357 composite heterogeneity was not available, however, choosing between outcome measures to  
6  
7 358 decide which best represents a particular domain would have posed a significant risk of selection  
8  
9 359 bias. This partly stems from the fact that 'gold standard' tests for the different cognitive domains  
10  
11  
12 360 have not been identified.

13  
14  
15 361 Another limitation of the present meta-analysis is the lack of registration on Prospero. The  
16  
17 362 registration could ensure that the protocol and results are available to other researchers for  
18  
19 363 replication and updating.<sup>61</sup> However unfortunately at the stage of registration of our  
20  
21  
22 364 protocol, data extraction was complete and the study was therefore ineligible to be  
23  
24  
25 365 registered on Prospero.

26  
27  
28 366 The literature suggests multiple factors may influence the efficacy of cognitive interventions.<sup>62</sup> An  
29  
30 367 aim of the current analysis was to provide insight regarding CCT design choices and training  
31  
32 368 outcomes to inform decisions on interventions to use both clinically and in future studies. Of note,  
33  
34 369 the sub-groups analyses and meta-regression did not find any significant differences between  
35  
36  
37 370 studies with active and non-active control conditions for any domain, or between multi-domain and  
38  
39  
40 371 single-domain CCT. Due to the limited number of studies and heterogeneity of interventions and  
41  
42 372 outcome measures, it is difficult to make clear recommendations for the optimal form of CCT.

43  
44  
45 373 This meta-analysis has demonstrated efficacy of CCT in MCI patients for a very specific outcome:  
46  
47 374 performance on a neuropsychological test immediately post-intervention. Whilst promising, this is  
48  
49 375 far removed from the goal of slowing progression to or preventing dementia in MCI patients. There  
50  
51  
52 376 was a lack of follow-up data, with only three studies<sup>50 53 63</sup> including long-term outcome measures,  
53  
54 377 so no conclusions can be drawn regarding the longevity of the small to moderate effects or the  
55  
56 378 transfer of immediate effects. In addition, benefits on neuropsychological testing may not translate  
57  
58 379 to clinically meaningful benefits in everyday function. Barnett and Ceci<sup>64</sup> describe the immediate  
59  
60

1  
2  
3 380 outcomes measured here as 'near transfer' and the long-term transfer to untrained cognitive  
4  
5 381 abilities as 'far transfer'. If there is any possibility of dementia being prevented or delayed using CCT  
6  
7 382 then 'far transfer' of some sort is likely necessary. A review by Zelinski <sup>65</sup> outlines how 'far transfer'  
8  
9  
10 383 from cognitive training has been observed in aging population, though this is not specific to CCT or  
11  
12 384 MCI. Demonstration of 'far transfer' as a result of cognitive training in healthy adults is very rare and  
13  
14 385 there is increasing evidence that even 'near transfer' is difficult to demonstrate convincingly. <sup>66</sup> More  
15  
16 386 research into long-term transfer effects of CCT in patients with MCI is vital in determining its  
17  
18  
19 387 potential to reduce the dementia burden.

### 20 21 22 388 **Suggestions for future research**

23  
24 389 The discussion highlights factors limiting the reliability and transferability of the results of the  
25  
26 390 meta-analysis. These limitations may be potentially overcome by more RCTs examining long-term  
27  
28 391 cognitive outcomes to assess transfer of CCT to everyday life and provide more insight on whether  
29  
30 392 CCT can influence progression to dementia. It is feasible to conduct large and longitudinal studies of  
31  
32 393 CCT, as it can be delivered online and therefore be easily and widely available. The standardization  
33  
34 394 of outcome measures between RCTs would also avoid problems associated with heterogeneity and  
35  
36 395 overall higher methodological quality of RCTs would reduce bias.

### 37 38 39 40 41 396 **Conclusion**

42  
43  
44 397 This meta-analysis has demonstrated support for the hypothesis that CCT improves cognitive  
45  
46 398 function in older people with MCI. However, the long-term transfer of these improvements and  
47  
48 399 relevance to reducing dementia prevalence remains unknown. Various methodological issues such  
49  
50 400 as heterogeneity in outcome measures, interventions and MCI symptoms and lack of ITT analyses  
51  
52 401 are significant limitations of the literature. Long-term outcomes are the next priority for CCT in MCI  
53  
54 402 patients to further explore its efficacy with respect to influencing dementia progression.

55  
56  
57  
58 403



1  
2  
3 404 **Contributors**  
4  
5

6 405 HZ, RB, JDH, RG, HW, XY and RJH all contributed to the conception and design of the review. HZ, BH,  
7  
8 406 CJT, JDH read and screened abstracts and titles of potentially relevant studies. HZ, RB, and JDH read  
9  
10 407 the retained papers and were responsible for extracting data and rating their quality independently.  
11  
12 408 HZ drafted the paper with all the authors critically reviewing it and suggesting amendments prior to  
13  
14 409 submission. All the authors had access to all the data in the study and can take responsibility for the  
15  
16 410 integrity of the reported findings.  
17  
18  
19

20 411 **Funding**  
21  
22

23 412 We acknowledge the funding provided by Beijing Municipal Science & Technology Commission (No.  
24  
25 413 Z161100000516001, D171100008217007). Haifeng Zhang is supported by the China Scholarship  
26  
27 414 Council (CSC) (No. 201706010329) to be a visiting Ph.D. student at University College London, UK. RB  
28  
29 415 is supported by a NIHR Academic Clinical Fellowship. JH, RG and RH are supported by the NIHR UCLH  
30  
31 416 BRC.  
32  
33  
34

35 417 **Competing interests**  
36  
37

38 418 None declared.  
39  
40

41 419 **Patient consent**  
42  
43

44 420 Not required.  
45  
46

47 421 **Provenance and peer review**  
48  
49

50 422 Not commissioned; externally peer reviewed.  
51  
52

53 423 **Data sharing statement**  
54  
55

56 424 Details of excluded papers are available from the first author on request.  
57  
58  
59  
60

426

427

428 **REFERENCES**

- 429 1. Alzheimer's Disease International. World Alzheimer Report 2015. 2015
- 430 2. Huckans M, Hutson L, Twamley E, et al. Efficacy of cognitive rehabilitation therapies for mild  
431 cognitive impairment (MCI) in older adults: working toward a theoretical model and  
432 evidence-based interventions. *Neuropsychol Rev* 2013;23(1):63-80. doi:  
433 10.1007/s11065-013-9230-9
- 434 3. Brookmeyer R, Johnson E, Ziegler-Graham K, et al. Forecasting the global burden of Alzheimer's  
435 disease. *Alzheimer's & dementia : the journal of the Alzheimer's Association* 2007;3(3):186-91.  
436 doi: 10.1016/j.jalz.2007.04.381
- 437 4. Petersen RC, Smith GE, Waring SC, et al. Mild cognitive impairment: clinical characterization and  
438 outcome. *Archives of neurology* 1999;56(3):303-8.
- 439 5. Gauthier S, Reisberg B, Zaudig M, et al. Mild cognitive impairment. *Lancet*  
440 2006;367(9518):1262-70. doi: 10.1016/s0140-6736(06)68542-5
- 441 6. Petersen RC. Mild Cognitive Impairment. *Continuum (Minneap Minn)* 2016;22(2 Dementia):404-18.  
442 doi: 10.1212/CON.0000000000000313
- 443 7. Karakaya T, Fusser F, Schroder J, et al. Pharmacological Treatment of Mild Cognitive Impairment  
444 as a Prodromal Syndrome of Alzheimer s Disease. *Curr Neuropharmacol* 2013;11(1):102-8.  
445 doi: 10.2174/157015913804999487
- 446 8. Gates N, Valenzuela M. Cognitive Exercise and Its Role in Cognitive Function in Older Adults.  
447 *Current Psychiatry Reports* 2010;12(1):20-27. doi: 10.1007/s11920-009-0085-y
- 448 9. Ball K, Berch DB, Helmers KF, et al. Effects of cognitive training interventions with older adults: a  
449 randomized controlled trial. *Jama* 2002;288(18):2271-81.
- 450 10. Kueider AM, Parisi JM, Gross AL, et al. Computerized cognitive training with older adults: a  
451 systematic review. *PloS one* 2012;7(7):e40588. doi: 10.1371/journal.pone.0040588
- 452 11. Jak AJ, Seelye AM, Jurick SM. Crosswords to computers: a critical review of popular approaches  
453 to cognitive enhancement. *Neuropsychology review* 2013;23(1):13-26.
- 454 12. Owen AM, Hampshire A, Grahn JA, et al. Putting brain training to the test. *Nature*  
455 2010;465(7299):775-78. doi: 10.1038/nature09042
- 456 13. Hughes TF, Flatt JD, Fu B, et al. Interactive video gaming compared with health education in older  
457 adults with mild cognitive impairment: a feasibility study. *International journal of geriatric*  
458 *psychiatry* 2014;29(9):890-8. doi: 10.1002/gps.4075
- 459 14. Gates NJ, Sachdev PS, Singh MAF, et al. Cognitive and memory training in adults at risk of  
460 dementia: A Systematic Review. *BMC geriatrics* 2011;11 doi: Artn 55  
461 10.1186/1471-2318-11-55

- 1  
2  
3 462 15. Huntley JD, Gould RL, Liu K, et al. Do cognitive interventions improve general cognition in  
4 463 dementia? A meta-analysis and meta-regression. *Bmj Open* 2015;5(4) doi: ARTN e005247  
5  
6 464 10.1136/bmjopen-2014-005247  
7  
8 465 16. Wilson RS, Mendes De Leon CF, Barnes LL, et al. Participation in cognitively stimulating activities  
9 466 and risk of incident Alzheimer disease. *Jama* 2002;287(6):742-8.  
10  
11 467 17. Belleville S. Cognitive training for persons with mild cognitive impairment. *International*  
12 468 *Psychogeriatrics* 2008;20(01) doi: 10.1017/s104161020700631x  
13  
14 469 18. Mowszowski L, Hermens DF, Diamond K, et al. Cognitive training enhances pre-attentive  
15 470 neurophysiological responses in older adults 'at risk' of dementia. *Journal of Alzheimer's*  
16 471 *disease : JAD* 2014;41(4):1095-108. doi: <https://dx.doi.org/10.3233/JAD-131985>  
17  
18 472 19. Reijnders J, van Heugten C, van Boxtel M. Cognitive interventions in healthy older adults and  
19 473 people with mild cognitive impairment: a systematic review. *Ageing Res Rev*  
20 474 2013;12(1):263-75. doi: 10.1016/j.arr.2012.07.003  
21  
22 475 20. Gunther VK, Schafer P, Holzner BJ, et al. Long-term improvements in cognitive performance  
23 476 through computer-assisted cognitive training: a pilot study in a residential home for older  
24 477 people. *Ageing Ment Health* 2003;7(3):200-06. doi: 10.1080/1360786031000101175  
25  
26 478 21. Cipriani G, Bianchetti A, Trabucchi M. Outcomes of a computer-based cognitive rehabilitation  
27 479 program on Alzheimer's disease patients compared with those on patients affected by mild  
28 480 cognitive impairment. *Archives of gerontology and geriatrics* 2006;43(3):327-35. doi:  
29 481 10.1016/j.archger.2005.12.003  
30  
31 482 22. Gonzalez-Palau F, Franco M, Bamidis P, et al. The effects of a computer-based cognitive and  
32 483 physical training program in a healthy and mildly cognitive impaired aging sample. *Ageing Ment*  
33 484 *Health* 2014;18(7):838-46. doi: 10.1080/13607863.2014.899972  
34  
35 485 23. Rosen AC, Sugiura L, Kramer JH, et al. Cognitive training changes hippocampal function in mild  
36 486 cognitive impairment: a pilot study. *Journal of Alzheimer's disease : JAD* 2011;26 Suppl  
37 487 3:349-57. doi: 10.3233/jad-2011-0009  
38  
39 488 24. Eckroth-Bucher M, Siberski J. Preserving cognition through an integrated cognitive stimulation  
40 489 and training program. *Am J Alzheimers Dis Other Demen* 2009;24(3):234-45. doi:  
41 490 10.1177/1533317509332624  
42  
43 491 25. Galante E, Venturini G, Fiaccadori C. Computer-based cognitive intervention for dementia:  
44 492 preliminary results of a randomized clinical trial. *G Ital Med Lav Ergon* 2007;29(3 Suppl  
45 493 B):B26-32.  
46  
47 494 26. Gaitan A, Garolera M, Cerulla N, et al. Efficacy of an adjunctive computer-based cognitive training  
48 495 program in amnesic mild cognitive impairment and Alzheimer's disease: a single-blind,  
49 496 randomized clinical trial. *International journal of geriatric psychiatry* 2013;28(1):91-9. doi:  
50 497 <https://dx.doi.org/10.1002/gps.3794>  
51  
52 498 27. Zhuang JP, Fang R, Feng X, et al. The impact of human-computer interaction-based  
53 499 comprehensive training on the cognitive functions of cognitive impairment elderly individuals  
54  
55  
56  
57  
58  
59  
60

- 1  
2  
3 500 in a nursing home. *Journal of Alzheimer's disease : JAD* 2013;36(2):245-51. doi:  
4 501 10.3233/jad-130158
- 6 502 28. Bavelier D, Green CS, Han DH, et al. Brains on video games. *Nat Rev Neurosci*  
7 503 2011;12(12):763-8. doi: 10.1038/nrn3135
- 9 504 29. Li H, Li J, Li N, et al. Cognitive intervention for persons with mild cognitive impairment: A  
10 505 meta-analysis. *Ageing Res Rev* 2011;10(2):285-96. doi: 10.1016/j.arr.2010.11.003
- 12 506 30. Martin M, Clare L, Altgassen AM, et al. Cognition-based interventions for healthy older people and  
13 507 people with mild cognitive impairment. *The Cochrane database of systematic reviews*  
14 508 2011(1):CD006220. doi: 10.1002/14651858.CD006220.pub2
- 16 509 31. Simon SS, Yokomizo JE, Bottino CM. Cognitive intervention in amnesic Mild Cognitive  
17 510 Impairment: a systematic review. *Neurosci Biobehav Rev* 2012;36(4):1163-78. doi:  
18 511 10.1016/j.neubiorev.2012.01.007
- 21 512 32. Hill NT, Mowszowski L, Naismith SL, et al. Computerized Cognitive Training in Older Adults With  
22 513 Mild Cognitive Impairment or Dementia: A Systematic Review and Meta-Analysis. *Am J*  
23 514 *Psychiatry* 2017;174(4):329-40. doi: 10.1176/appi.ajp.2016.16030360
- 25 515 33. Sherman DS, Mauser J, Nuno M, et al. The Efficacy of Cognitive Intervention in Mild Cognitive  
26 516 Impairment (MCI): a Meta-Analysis of Outcomes on Neuropsychological Measures.  
27 517 *Neuropsychol Rev* 2017;27(4):440-84. doi: 10.1007/s11065-017-9363-3
- 29 518 34. Coyle H, Traynor V, Solowij N. Computerized and virtual reality cognitive training for individuals at  
30 519 high risk of cognitive decline: systematic review of the literature. *The American journal of*  
31 520 *geriatric psychiatry : official journal of the American Association for Geriatric Psychiatry*  
32 521 2015;23(4):335-59. doi: 10.1016/j.jagp.2014.04.009
- 34 522 35. Ge S, Zhu Z, Wu B, et al. Technology-based cognitive training and rehabilitation interventions for  
35 523 individuals with mild cognitive impairment: a systematic review. *BMC geriatrics*  
36 524 2018;18(1):213. doi: 10.1186/s12877-018-0893-1
- 38 525 36. Djabelkhir L, Wu YH, Vidal JS, et al. Computerized cognitive stimulation and engagement  
39 526 programs in older adults with mild cognitive impairment: comparing feasibility, acceptability,  
40 527 and cognitive and psychosocial effects. *Clinical interventions in aging* 2017;12:1967-75. doi:  
41 528 10.2147/cia.s145769
- 43 529 37. Han JW, Son KL, Byun HJ, et al. Efficacy of the Ubiquitous Spaced Retrieval-based Memory  
44 530 Advancement and Rehabilitation Training (USMART) program among patients with mild  
45 531 cognitive impairment: a randomized controlled crossover trial. *Alzheimers Res Ther* 2017;9:8.  
46 532 doi: 10.1186/s13195-017-0264-8
- 48 533 38. Savulich G, Piercy T, Fox C, et al. Cognitive Training Using a Novel Memory Game on an iPad in  
49 534 Patients with Amnesic Mild Cognitive Impairment (aMCI). *Int J Neuropsychopharmacol* 2017  
50 535 doi: 10.1093/ijnp/pyx040
- 52 536 39. Gates NJ, Vernooij RW, Di Nisio M, et al. Computerised cognitive training for preventing dementia  
53 537 in people with mild cognitive impairment. *The Cochrane database of systematic reviews*  
54 538 2019;3(3):CD012279. doi: 10.1002/14651858.CD012279.pub2 [published Online First:  
55 539 2019/03/14]

- 1  
2  
3 540 40. Petersen RC, Doody R, Kurz A, et al. Current concepts in mild cognitive impairment. *Archives of*  
4 541 *neurology* 2001;58(12):1985-92. [published Online First: 2001/12/26]  
5  
6 542 41. Higgins JPT GS, (editors). Cochrane Handbook for Systematic Reviews of Interventions Version  
7 543 5.1.0 [updated March 2011]. : The Cochrane Collaboration 2011.  
8  
9 544 42. Hedges LV OI. Statistical Methods for Meta-Analysis: New York: Academic Press 1985.  
10  
11 545 43. Higgins JP, Thompson SG, Deeks JJ, et al. Measuring inconsistency in meta-analyses. *BMJ*  
12 546 2003;327(7414):557-60. doi: 10.1136/bmj.327.7414.557  
13  
14 547 44. Borenstein M. Introduction to meta-analysis 2009.  
15 548 45. Moher D, Liberati A, Tetzlaff J, et al. Preferred reporting items for systematic reviews and  
16 549 meta-analyses: the PRISMA statement. *BMJ* 2009;339:b2535. doi: 10.1136/bmj.b2535  
17  
18 550 46. Optale G, Urgesi C, Busato V, et al. Controlling memory impairment in elderly adults using virtual  
19 551 reality memory training: a randomized controlled pilot study. *Neurorehabilitation and neural*  
20 552 *repair* 2010;24(4):348-57. doi: 10.1177/1545968309353328  
21  
22 553 47. Barnes DE, Yaffe K, Belfor N, et al. Computer-based cognitive training for mild cognitive  
23 554 impairment: results from a pilot randomized, controlled trial. *Alzheimer disease and*  
24 555 *associated disorders* 2009;23(3):205-10. doi: 10.1097/WAD.0b013e31819c6137  
25  
26 556 48. Chandler MJ, Locke DEC, Duncan NL, et al. Computer versus Compensatory Calendar Training  
27 557 in Individuals with Mild Cognitive Impairment: Functional Impact in a Pilot Study. *Brain*  
28 558 *sciences* 2017;7(9):10. doi: 10.3390/brainsci7090112  
29  
30 559 49. Han JW, Lee H, Hong JW, et al. Multimodal cognitive enhancement therapy for patients with mild  
31 560 cognitive impairment and mild dementia: A multi- center, randomized, controlled, double-blind,  
32 561 crossover trial. *Journal of Alzheimer's Disease* 2017;55(2):787-96. doi:  
33 562 <http://dx.doi.org/10.3233/JAD-160619>  
34  
35 563 50. Fiatarone Singh MA, Gates N, Saigal N, et al. The Study of Mental and Resistance Training  
36 564 (SMART) study-resistance training and/or cognitive training in mild cognitive impairment: a  
37 565 randomized, double-blind, double-sham controlled trial. *J Am Med Dir Assoc*  
38 566 2014;15(12):873-80. doi: 10.1016/j.jamda.2014.09.010  
39  
40 567 51. Gagnon LG, Belleville S. Training of attentional control in mild cognitive impairment with executive  
41 568 deficits: results from a double-blind randomised controlled study. *Neuropsychological*  
42 569 *rehabilitation* 2012;22(6):809-35. doi: <https://dx.doi.org/10.1080/09602011.2012.691044>  
43  
44 570 52. Ciarmiello A, Gaeta MC, Benso F, et al. FDG-PET in the Evaluation of Brain Metabolic Changes  
45 571 Induced by Cognitive Stimulation in aMCI Subjects. *Curr Radiopharm* 2015;8(1):69-75. doi:  
46 572 10.2174/1874471008666150428122924  
47  
48 573 53. Hyer L, Scott C, Atkinson MM, et al. Cognitive Training Program to Improve Working Memory in  
49 574 Older Adults with MCI. *Clin Gerontologist* 2016;39(5):410-27. doi:  
50 575 10.1080/07317115.2015.1120257  
51  
52 576 54. Lin F, Heffner KL, Ren P, et al. Cognitive and Neural Effects of Vision-Based  
53 577 Speed-of-Processing Training in Older Adults with Amnesic Mild Cognitive Impairment: A  
54 578 Pilot Study. *Journal of the American Geriatrics Society* 2016;64(6):1293-8. doi:  
55 579 10.1111/jgs.14132

- 1  
2  
3 580 55. Kwok T, Wong A, Chan G, et al. Effectiveness of cognitive training for Chinese elderly in Hong  
4 581 Kong. *Clinical interventions in aging* 2013;8:213-9. doi: 10.2147/CIA.S38070 [published  
5 582 Online First: 2013/02/27]  
6  
7 583 56. Papp KV WS, Snyder PJ. Immediate and delayed effects of cognitive interventions in healthy  
8 584 elderly: a review of current literature and future directions. . 2009  
9  
10 585 57. Martin M CL, Altgassen AM, Cameron MH, Zehnder F. Cognition-based interventions for healthy  
11 586 older people and people with mild cognitive impairment. . 2011  
12  
13 587 58. Vidovich MR, Lautenschlager NT, Flicker L, et al. The PACE study: A randomized clinical trial of  
14 588 cognitive activity strategy training for older people with mild cognitive impairment. *American*  
15 589 *Journal of Geriatric Psychiatry* 2015;23(4):360-72. doi:  
16 590 <http://dx.doi.org/10.1016/j.jagp.2014.04.002>  
17  
18 591 59. Petersen RC. Mild cognitive impairment clinical trials. 2003  
19  
20 592 60. Libon DJ XS, Eppig J, Wicas G, Lamar M, Lippa C, Bettcher BM, Price CC, Giovannetti T,  
21 593 Swenson R, Wambach DM. The heterogeneity of mild cognitive impairment: a  
22 594 neuropsychological analysis. 2009  
23  
24 595 61. Booth A, Clarke M, Dooley G, et al. The nuts and bolts of PROSPERO: an international  
25 596 prospective register of systematic reviews. *Syst Rev* 2012;1:2. doi: 10.1186/2046-4053-1-2  
26 597 [published Online First: 2012/05/17]  
27  
28 598 62. V. Solfrizzi FP, A.M. Colacicco, A. D'Introno, C. Capurso, F. Torres, F. Grigoletto, S. Maggi, A. Del  
29 599 Parigi, E.M. Reiman, R.J. Caselli, E. Scafato, G. Farchi, A. Capurso. Vascular risk factors,  
30 600 incidence of MCI, and rates of progression to dementia. 2004  
31  
32 601 63. Herrera C, Chambon C, Michel BF, et al. Positive effects of computer-based cognitive training in  
33 602 adults with mild cognitive impairment. *Neuropsychologia* 2012;50(8):1871-81. doi:  
34 603 10.1016/j.neuropsychologia.2012.04.012  
35  
36 604 64. Barnett SM CS. When and where do we apply what we learn? A taxonomy for far transfer. 2002  
37  
38 605 65. Meta-Analysis CCTiOAWMCIoDASRa. Far transfer in cognitive training of older adults. 2014  
39  
40 606 66. Stojanoski B, Lyons KM, Pearce AAA, et al. Targeted training: Converging evidence against the  
41 607 transferable benefits of online brain training on cognitive function. *Neuropsychologia* 2018 doi:  
42 608 10.1016/j.neuropsychologia.2018.07.013  
43  
44 609 67. Barban F, Annicchiarico R, Pantelopoulos S, et al. Protecting cognition from aging and  
45 610 Alzheimer's disease: a computerized cognitive training combined with reminiscence therapy.  
46 611 *International journal of geriatric psychiatry* 2016;31(4):340-8. doi:  
47 612 <https://dx.doi.org/10.1002/gps.4328>  
48  
49 613 68. Finn M, McDonald S. Computerised Cognitive Training for Older Persons With Mild Cognitive  
50 614 Impairment: A Pilot Study Using a Randomised Controlled Trial Design. *Brain Impair*  
51 615 2011;12(3):187-99.  
52  
53 616 69. Finn M, McDonald S. Repetition-lag training to improve recollection memory in older people with  
54 617 amnesic mild cognitive impairment. A randomized controlled trial. *Aging Neuropsychol C*  
55 618 2015;22(2):244-58. doi: 10.1080/13825585.2014.915918  
56  
57  
58  
59  
60

- 1  
2  
3 619 70. Gooding AL, Choi J, Fiszdon JM, et al. Comparing three methods of computerised cognitive  
4 620 training for older adults with subclinical cognitive decline. *Neuropsychological Rehabilitation*  
5 621 2016;26(5-6):810-21. doi: 10.1080/09602011.2015.1118389  
6  
7 622 71. Hagovska M, Olekszyova Z. Impact of the combination of cognitive and balance training on gait,  
8 623 fear and risk of falling and quality of life in seniors with mild cognitive impairment. *Geriatrics &*  
9 624 *Gerontology International* 2016;16(9):1043-50. doi: 10.1111/ggi.12593  
10  
11 625 72. Rozzini L, Costardi D, Chilovi BV, et al. Efficacy of cognitive rehabilitation in patients with mild  
12 626 cognitive impairment treated with cholinesterase inhibitors. *International journal of geriatric*  
13 627 *psychiatry* 2007;22(4):356-60. doi: 10.1002/gps.1681  
14  
15  
16  
17 628

For peer review only

629

630

**Table 1.** Characteristics of studies using computerised cognitive training in persons with MCI

| Author and Year                          | CCT Group N, age, education                                | Control Group N, age, education                            | CCT type            | Total hours |
|------------------------------------------|------------------------------------------------------------|------------------------------------------------------------|---------------------|-------------|
| Barban et al 2016 <sup>67</sup>          | N = 46, Age = 74.4 (5.7), Edu = 9 (4.3)                    | N = 60, Age = 72.9 (6.0), Edu = 11 (4.7)                   | Multi domain        | 24          |
| Ciarmiello et al 2015 <sup>52</sup>      | N = 15, Age = 71.2 (7.7), Edu = 9.3 (3.0)                  | N = 15, Age = 72.0 (7.1), Edu = 7.8 (2.6)                  | Multi domain        | 24          |
| Djabelkhjr et al 2017 <sup>36</sup>      | N = 10, Age = 75.2 (6.4), Edu = 60.0% of college level     | N = 10, Age = 78.2 (7.0), Edu = 44.4% of college level     | Multi domain        | 18          |
| Fiatarone et al 2014 <sup>50</sup>       | N = 24, Age = >55, Edu = n/s                               | N = 27, Age = >55, Edu = n/s                               | Multi domain        | 80          |
| Finn & McDonald 2011 <sup>68</sup>       | N = 8, Age = 69.0 (7.7), Edu = 13.3 (2.2)                  | N = 8, Age = 76.4 (6.5), Edu = 12.0 (2.8)                  | Multi domain        | 25          |
| Finn & McDonald 2015 <sup>69</sup>       | N = 12, Age = 72.8 (5.7), Edu = 13.8 (3.0)                 | N = 12, Age = 75.1 (7.5), Edu = 13.7 (2.8)                 | Memory              | n/s         |
| Gagnon & Belleville 2012 <sup>51</sup>   | N = 12, Age = 67.0 (7.8), Edu = 15.0 (4.6)                 | N = 12, Age = 68.4 (6.0), Edu = 13.1 (5.7)                 | Attentional control | 6           |
| Gooding et al 2016 study 1 <sup>70</sup> | N = 31, Age = 75.6 (8.8), Edu = 15.1 (2.6)                 | N = 10, Age = 75.6 (8.8), Edu = 15.1 (2.6)                 | Multi domain        | 30          |
| Gooding et al 2016 study 2 <sup>70</sup> | N = 23, Age = 75.6 (8.8), Edu = 15.1 (2.6)                 | N = 10, Age = 75.6 (8.8), Edu = 15.1 (2.6)                 | Multi domain        | 30          |
| Hagovska et al 2016 <sup>71</sup>        | N = 40, Age = 68.0 (4.4), Edu = 75% of secondary education | N = 40, Age = 65.9 (6.2), Edu = 70% of secondary education | Multi domain        | 10          |
| Han et al 2017 <sup>37</sup>             | N = 23, Age = 73.7 (4.8), Edu = 13.5 (3.2)                 | N = 20, Age = 74.5 (6.4), Edu = 12.7 (3.7)                 | Memory              | 4           |



| Author and Year                   | CCT Group N, age, education                                     | Control Group N, age, education                                 | CCT type         | Total hours |
|-----------------------------------|-----------------------------------------------------------------|-----------------------------------------------------------------|------------------|-------------|
| Herrera et al 2012 <sup>63</sup>  | N = 11, Age = 75.1 (2.0), Edu = 46% of secondary school or more | N = 11, Age = 78.2 (1.4), Edu = 63% of secondary school or more | Multi domain     | 24          |
| Hughes et al 2014 <sup>13</sup>   | N = 10, Age = 78.5 (7.1), Edu = 13.8 (2.4)                      | N = 10, Age = 76.2 (4.3), Edu = 13.1 (1.9)                      | Multi domain     | 36          |
| Hyer et al 2016 <sup>53</sup>     | N = 34, Age = 75.1 (7.4), Edu = 70% secondary                   | N = 34, Age = 75.2 (7.8), Edu = 66% secondary                   | Working memory   | 16.7        |
| Lin et al 2016 <sup>54</sup>      | N = 10, Age = 72.9 (8.2), Edu = 90.0% of college level          | N = 11, Age = 73.1 (9.6), Edu = 54.5% of college level          | Processing speed | 24          |
| Rosen et al 2011 <sup>23</sup>    | N = 6, Age = 70.7 (10.6), Edu = 16.7 (0.8)                      | N = 6, Age = 78.0 (7.9), Edu = 18.3 (1.5)                       | Processing speed | 36          |
| Rozzini et al 2007 <sup>72</sup>  | N = 15, Age = 63-78, Edu = n/s                                  | N = 22, Age = 63-78, Edu = n/s                                  | Multi domain     | 60          |
| Savulich et al 2017 <sup>38</sup> | N = 21, Age = 75.2 (7.4), Edu = 15.9 (1.3) (Age left school)    | N = 21, Age = 76.9 (8.3) Edu = 16.0 (2.1) (Age left school)     | Memory           | 8           |

631 Notes: MMSE: Mini Mental State Examination, n/s: not stated

632

633

**Table 2** Results of Meta-analysis of computerised cognitive training (CCT) on cognitive domains

| Analysis of CCT    | No. of studies | N Tx*/control | Pooled Effect size g (95% CI) | Overall effect: Z (P value) | Heterogeneity: I <sup>2</sup> % (P value) |
|--------------------|----------------|---------------|-------------------------------|-----------------------------|-------------------------------------------|
| Global Cognition   | 11             | 258/245       | 0.23 (0.03, 0.44)             | z= 2.22, p = 0.03           | 6% p = 0.39                               |
| Memory             | 13             | 245/232       | 0.30 (0.11, 0.50)             | z = 3.03, p = 0.002         | 46% p = 0.04                              |
| Working Memory     | 5              | 82/83         | 0.39 (0.12, 0.66)             | z = 2.85, p = 0.004         | 0% p = 0.81                               |
| Executive Function | 11             | 171/182       | 0.20 (-0.03, 0.43)            | z= 1.74, p = 0.08           | 51% p = 0.03                              |

634

\*Tx = training group.

635

1  
2  
3 636 Figure 1 Flow chart of the study selection process  
4

5 637 Figure 2 Forest plot demonstrating the efficacy of CCT on global cognition function  
6

7 638 Figure 3 Forest plot demonstrating the efficacy of CCT on memory, working memory and executive function  
8

9 639  
10  
11  
12  
13  
14  
15  
16  
17  
18  
19  
20  
21  
22  
23  
24  
25  
26  
27  
28  
29  
30  
31  
32  
33  
34  
35  
36  
37  
38  
39  
40  
41  
42  
43  
44  
45  
46

For peer review only

1  
2  
3  
4  
5  
6  
7  
8  
9  
10  
11  
12  
13  
14  
15  
16  
17  
18  
19  
20  
21  
22  
23  
24  
25  
26  
27  
28  
29  
30  
31  
32  
33  
34  
35  
36  
37  
38  
39  
40  
41  
42  
43  
44  
45  
46  
47  
48  
49  
50  
51  
52  
53  
54  
55  
56  
57  
58  
59  
60

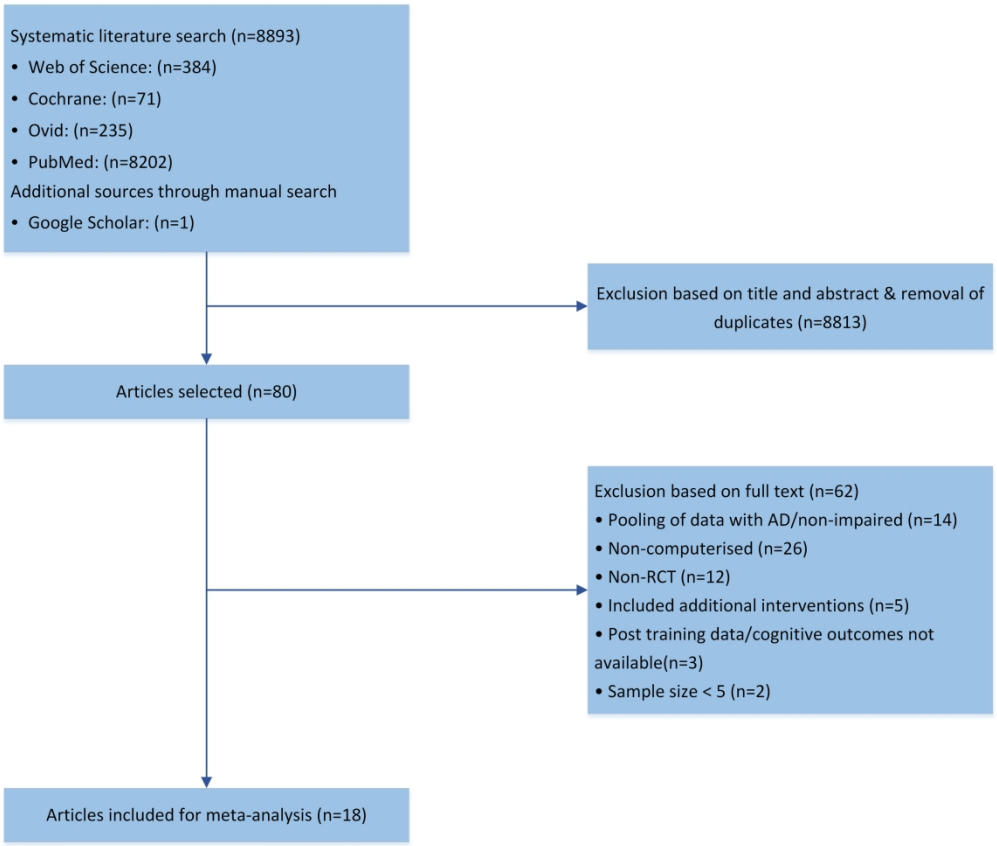

Figure 1. Flow chart of the study selection process

221x188mm (300 x 300 DPI)



Figure 2 Forest plot demonstrating the efficacy of CCT on global cognitive function

195x62mm (300 x 300 DPI)

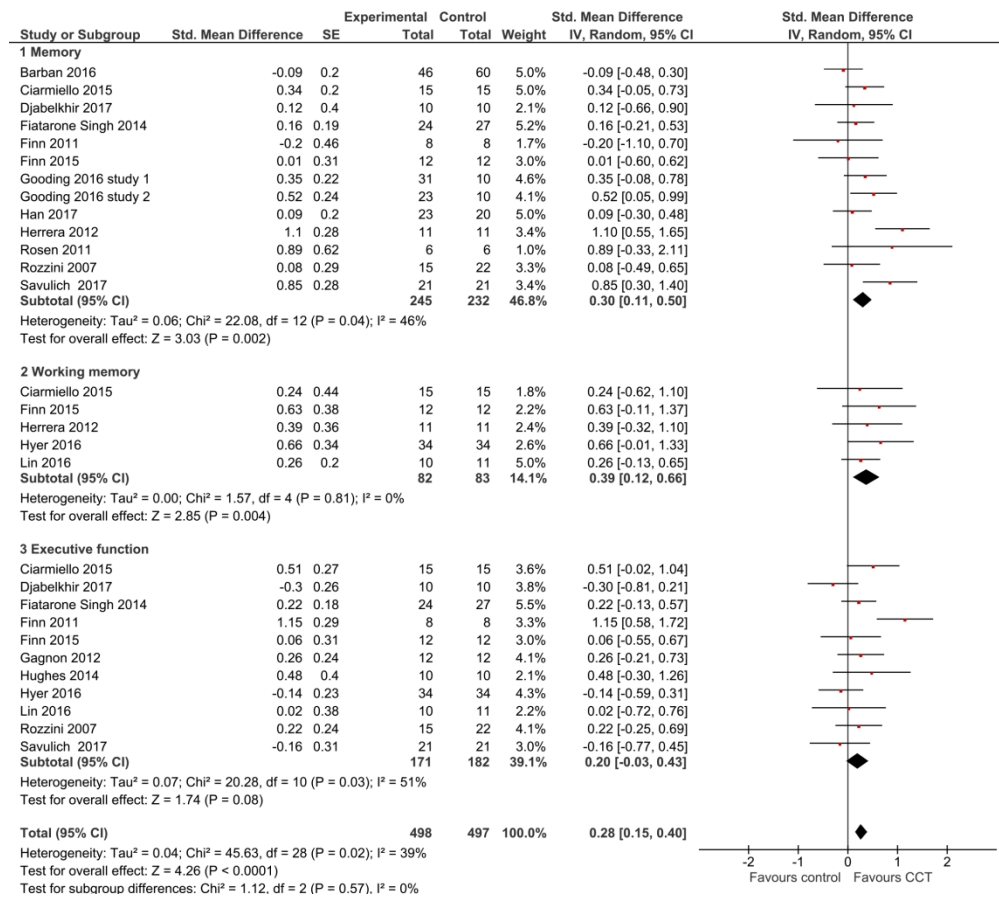

Figure 3 Forest plot demonstrating the efficacy of CCT on memory, working memory and executive function

195x173mm (300 x 300 DPI)

1  
2  
3 Supplement to: Zhang H, Huntley J, et al. The efficacy of Computerized Cognitive Training on  
4 cognitive outcomes in Mild Cognitive Impairment: A Systematic Review and Meta-Analysis.  
5  
6

7  
8 Supplementary Figure 1 summary of risk of bias for included studies  
9

10  
11 Supplementary Figure 2 Funnel plot demonstrating bias of CCT on global cognitive function  
12

13  
14 Supplementary Figure 3 Forest plot demonstrating efficacy of CCT on global cognition stratified by  
15 the type of control group  
16

17  
18 Supplementary Figure 4 Funnel plot demonstrating bias of CCT on global cognition stratified by the  
19 type of control group  
20

21  
22 Supplementary Figure 5 Funnel plot demonstrating bias of CCT on memory, working memory and  
23 executive function  
24

25  
26 Supplementary Figure 6 Forest plot demonstrating efficacy of CCT on memory stratified by the type  
27 of control group  
28

29  
30 Supplementary Figure 7 Funnel plot demonstrating bias of CCT on memory stratified by the type of  
31 control group  
32

33  
34 Supplementary Figure 8 Forest plot demonstrating efficacy of CCT on executive function stratified by  
35 the type of control group  
36

37  
38 Supplementary Figure 9 Funnel plot demonstrating bias of CCT on executive cognition stratified by  
39 the type of control group  
40

41  
42 Supplementary Figure 10 Forest plot demonstrating efficacy of CCT on memory stratified by single  
43 memory domain or multi-domain intervention  
44

45  
46 Supplementary Figure 11 Funnel plot demonstrating bias of CCT on memory stratified by single  
47 memory domain or multi-domain intervention  
48

49  
50 Supplementary Figure 12 Forest plot demonstrating efficacy of CCT on global cognition stratified by  
51 dose of the intervention  
52

53  
54 Supplementary Figure 13 Funnel plot demonstrating bias of CCT on global cognition stratified by  
55 dose of the intervention  
56  
57  
58  
59  
60

A.

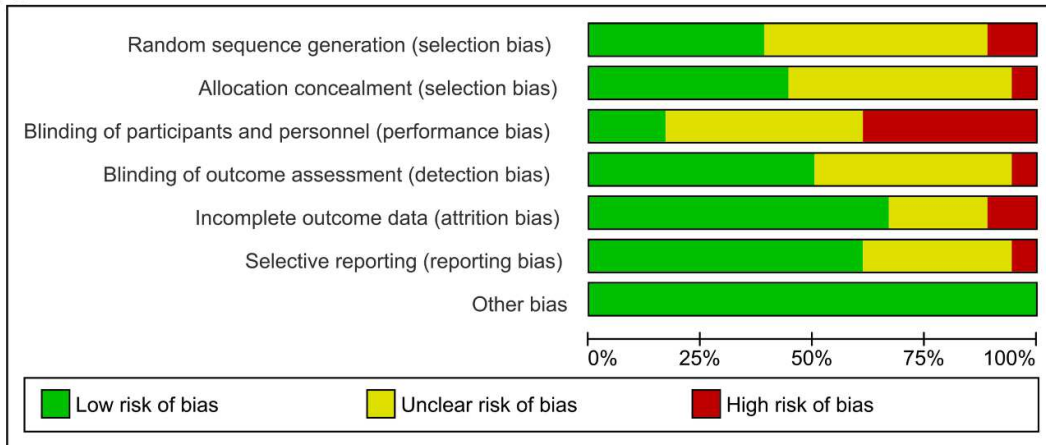

B.

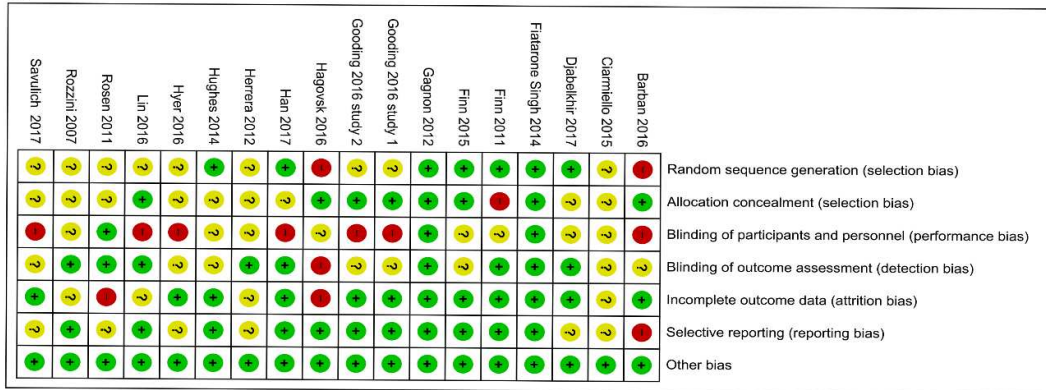

Supplementary Figure 1 (A-B). Summary of risk of bias for included studies. (A). Risk of bias graph: review authors' judgements about each risk of bias item presented as percentages across all included studies. (B). Risk of bias summary: review authors' judgements about each risk of bias item for each included study.



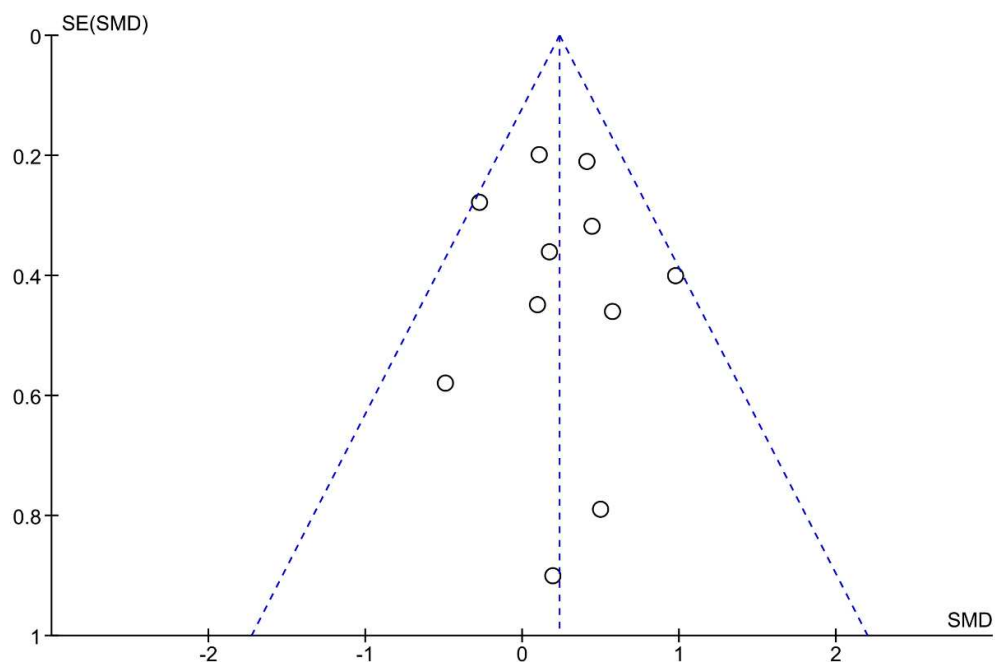

Supplementary Figure 2. Funnel plot demonstrating bias of CCT on global cognitive function

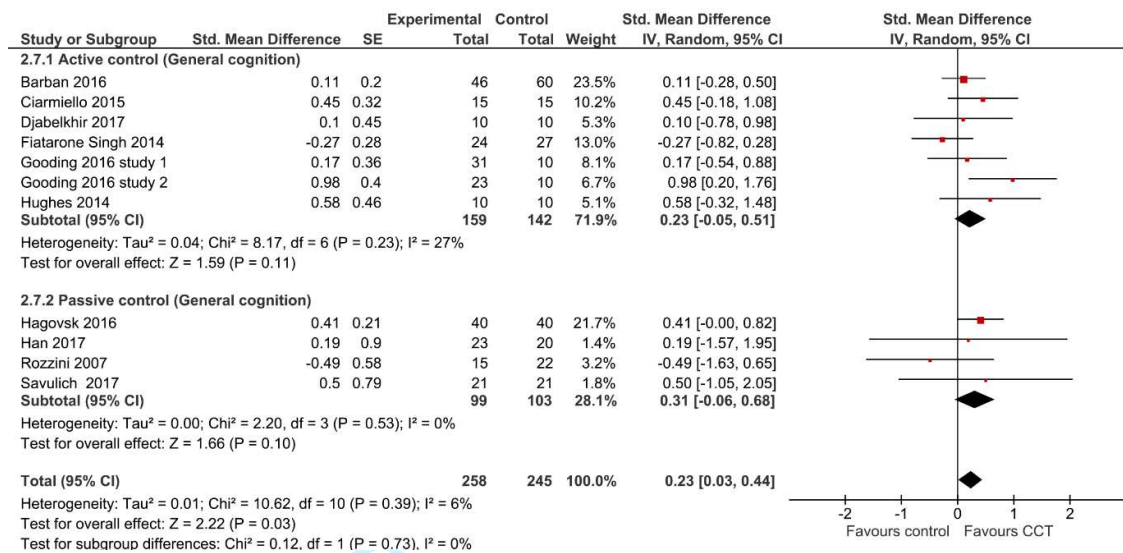

Supplementary Figure 3. Forest plot demonstrating efficacy of CCT on global cognition stratified by the type of control group

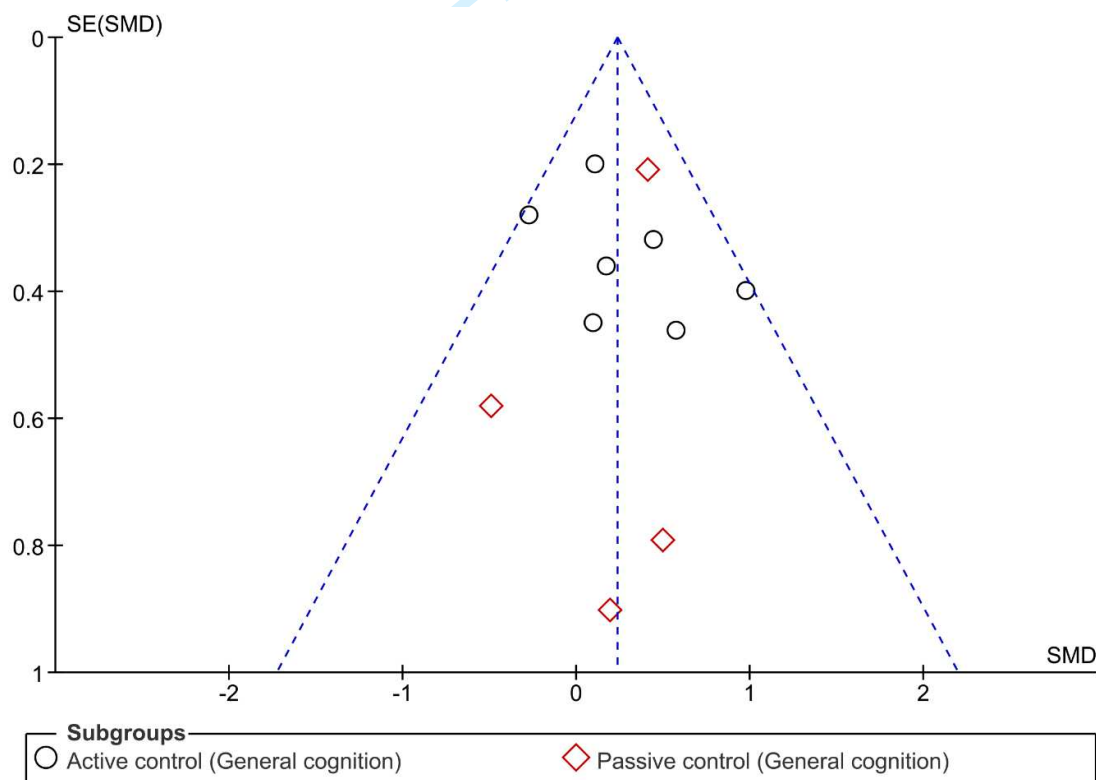

Supplementary Figure 4. Funnel plot demonstrating bias of CCT on global cognition stratified by the type of control group

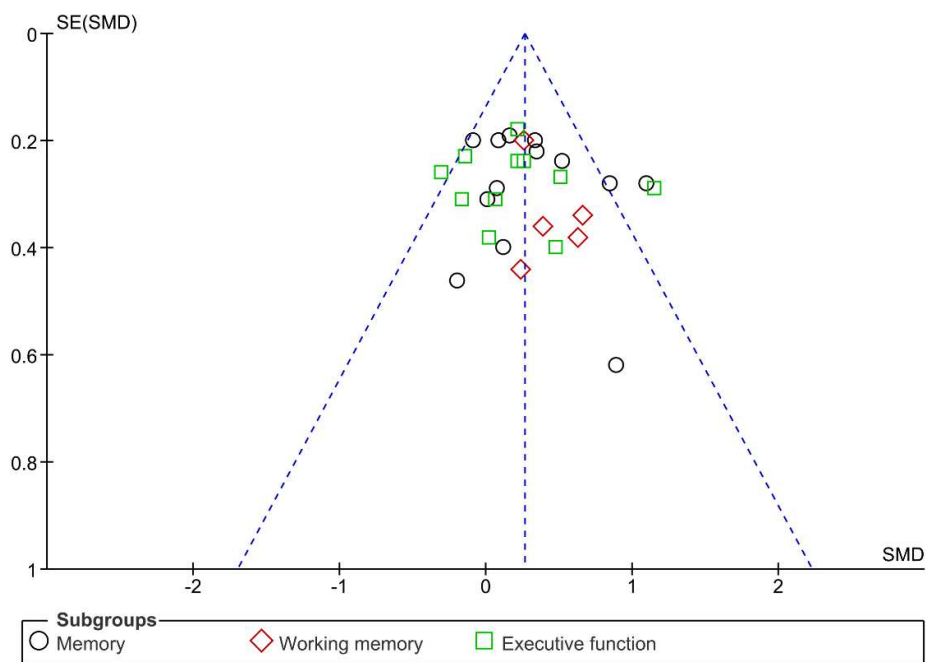

Supplementary Figure 5. Funnel plot demonstrating bias of CCT on memory, working memory and executive function



Supplementary Figure 6. Forest plot demonstrating efficacy of CCT on memory stratified by the type of control group

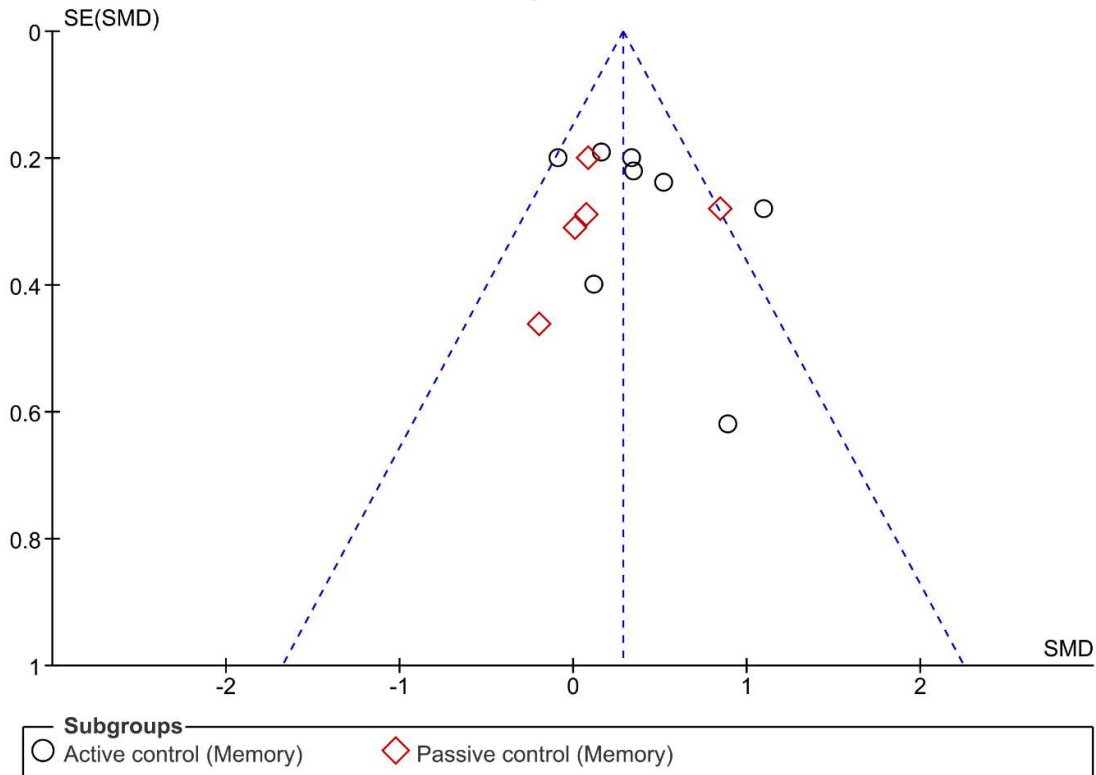

Supplementary Figure 7. Funnel plot demonstrating bias of CCT on memory stratified by the type of control group

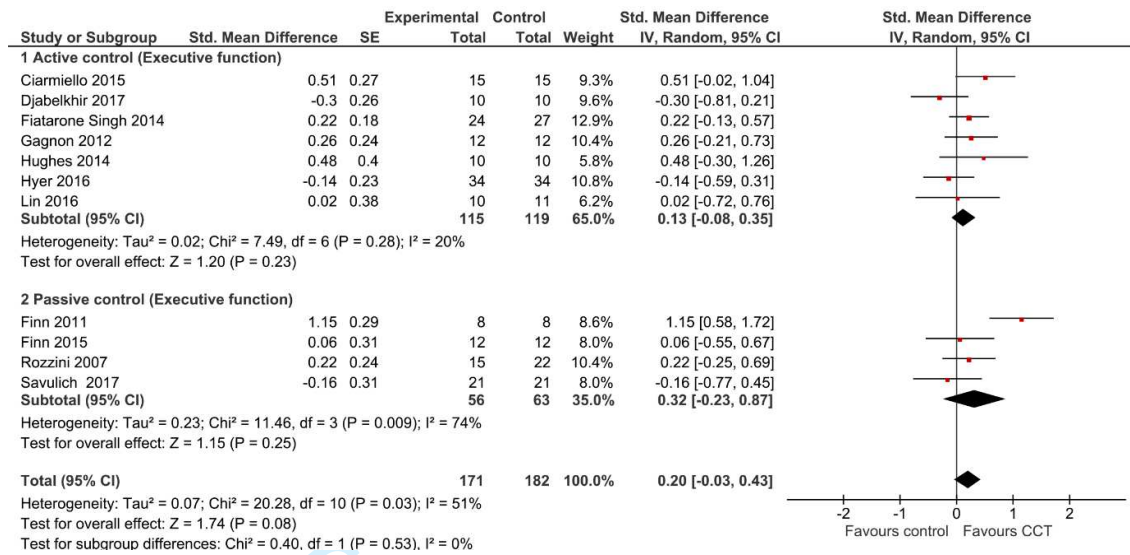

Supplementary Figure 8. Forest plot demonstrating efficacy of CCT on executive function stratified by the type of control group

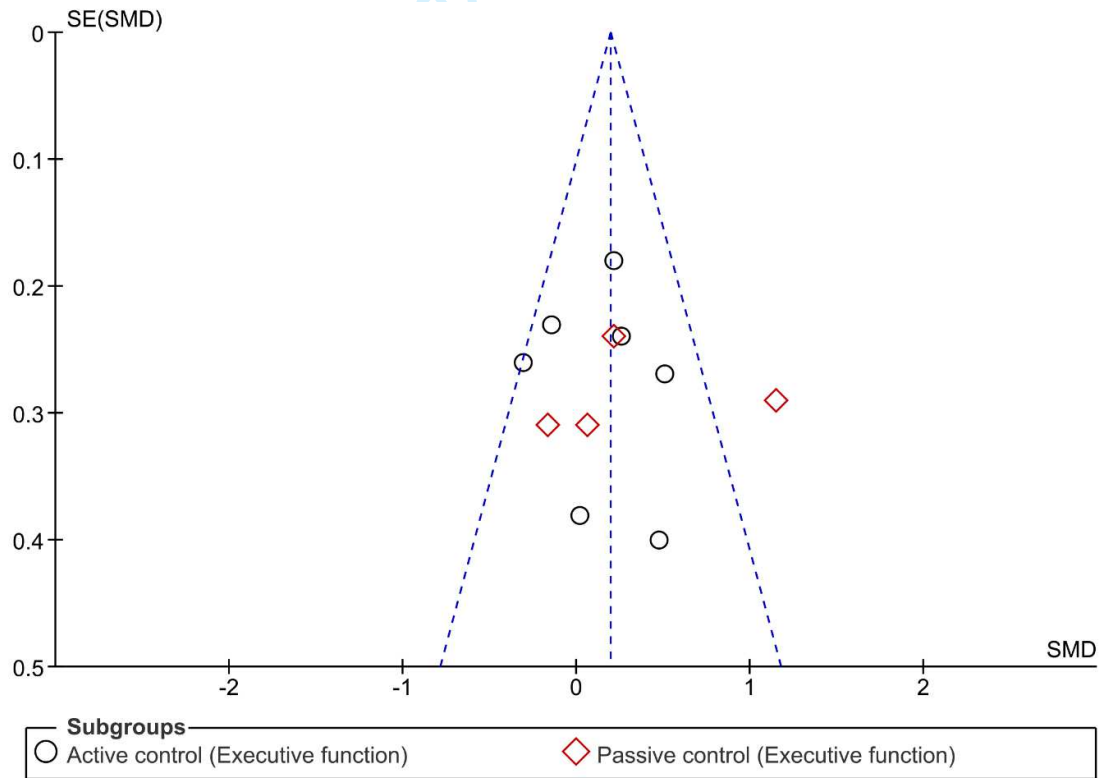

Supplementary Figure 9. Funnel plot demonstrating bias of CCT on executive cognition stratified by the type of control group



Supplementary Figure 10 Forest plot demonstrating efficacy of CCT on memory stratified by single memory domain or multi-domain intervention

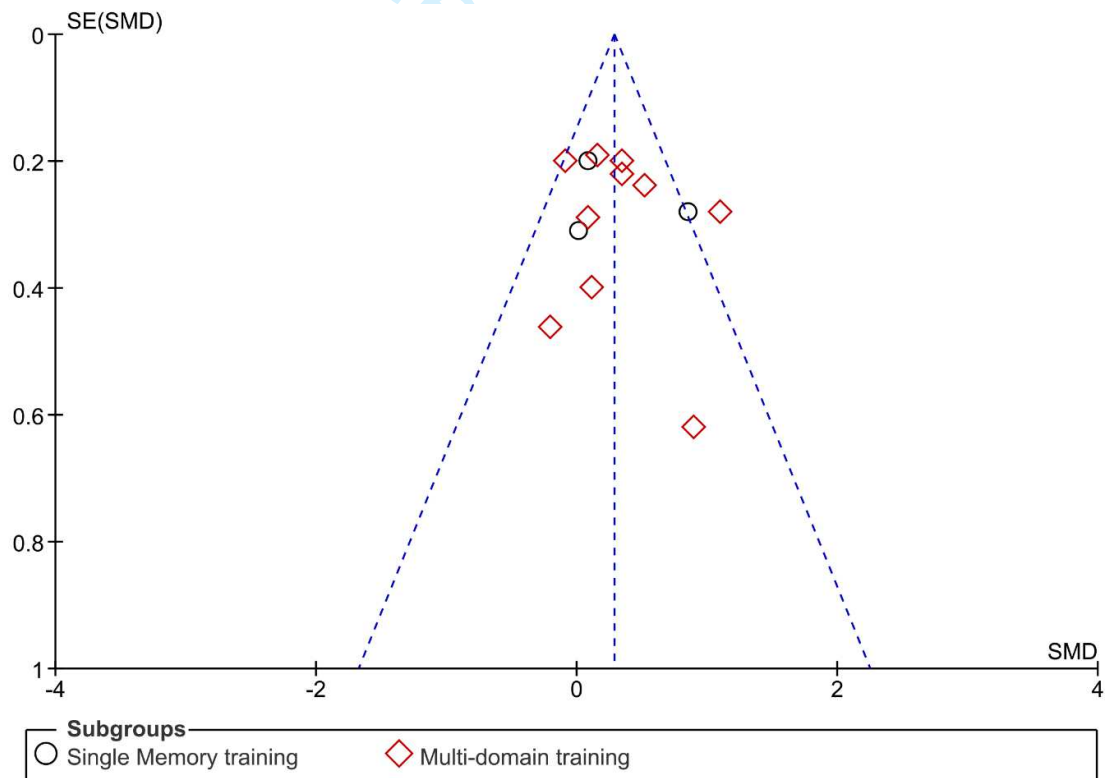

Supplementary Figure 11 Funnel plot demonstrating bias of CCT on memory stratified by single memory domain or multi-domain intervention

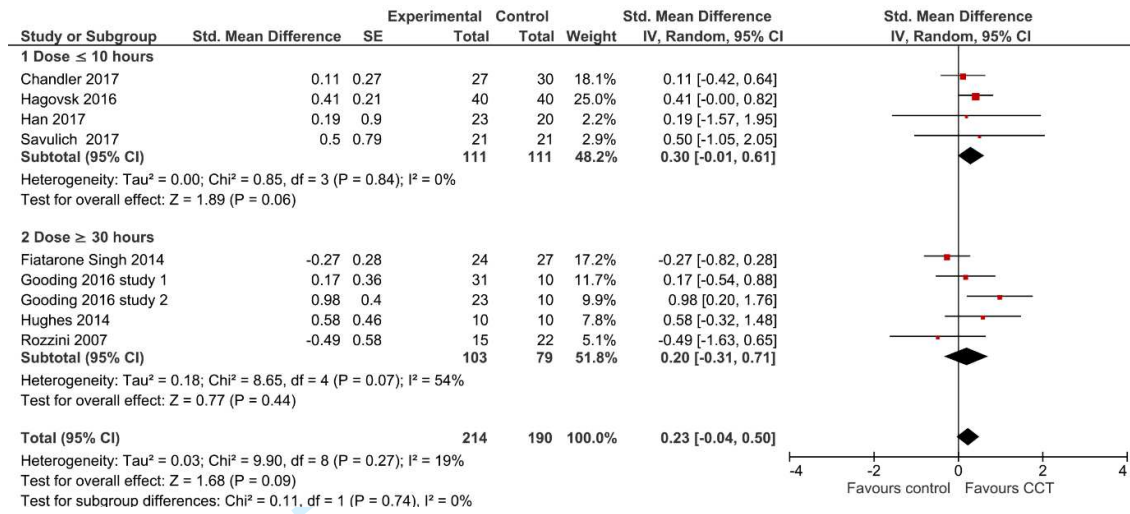

Supplementary Figure 12 Forest plot demonstrating efficacy of CCT on global cognition stratified by dose of the intervention

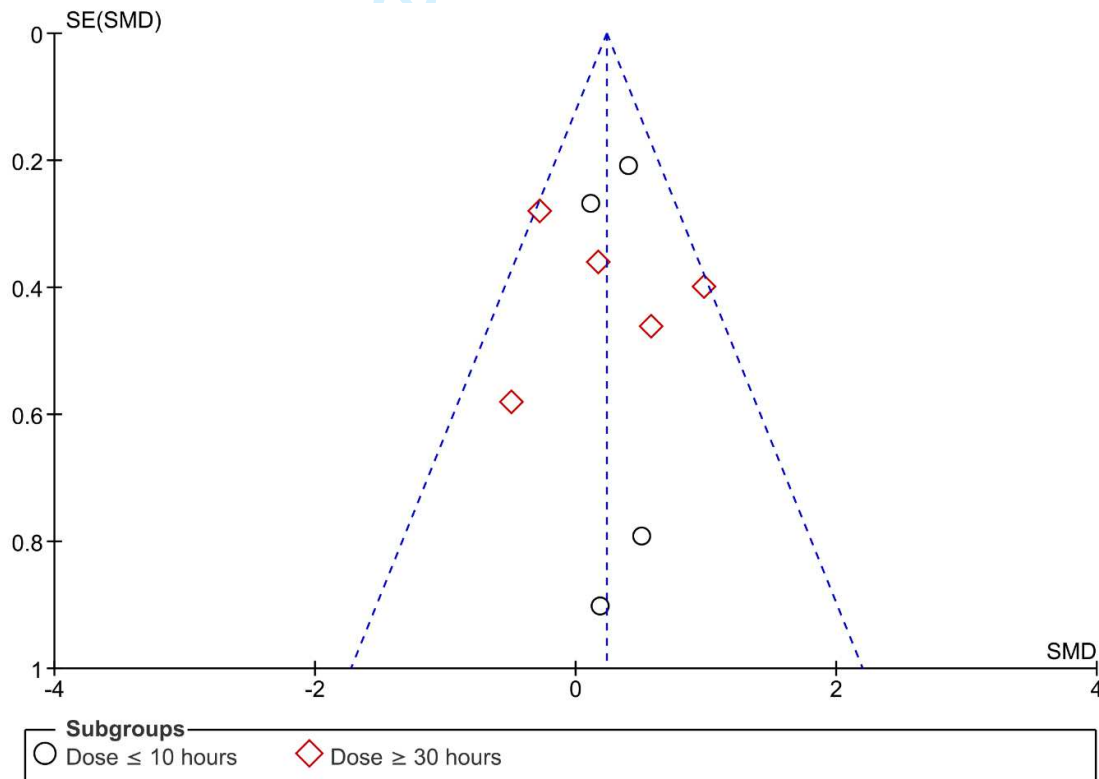

Supplementary Figure 13 Funnel plot demonstrating bias of CCT on global cognition stratified by dose of the intervention

1  
2  
3  
4  
5  
6  
7  
8  
9  
10  
11  
12  
13  
14  
15  
16  
17  
18  
19  
20  
21  
22  
23  
24  
25  
26  
27  
28  
29  
30  
31  
32  
33  
34  
35  
36  
37  
38  
39  
40  
41  
42  
43  
44  
45  
46

Supplement to: Zhang H, Huntley J, et al. The efficacy of Computerized Cognitive Training on cognitive outcomes in Mild Cognitive Impairment:  
A Systematic Review and Meta-Analysis.

**Supplementary Table 1** Search terms used for literature search

**Supplementary Table 2** Brief description of the specific outcome measures included in the meta-analysis

**Supplementary Table 3** Detailed Characteristics of studies using computerised cognitive training in persons with MCI

**Supplementary Appendix 1** Statistical methods



**Supplementary Table 1.** Search terms used for literature search

|                           |                                                                                                                                                                                                                                                                                                                                                                                                                                                                                                                                                                                                                                                                                                                                                                                                                                                                                                                                                                                                                                                                                                                                                                                                                   |
|---------------------------|-------------------------------------------------------------------------------------------------------------------------------------------------------------------------------------------------------------------------------------------------------------------------------------------------------------------------------------------------------------------------------------------------------------------------------------------------------------------------------------------------------------------------------------------------------------------------------------------------------------------------------------------------------------------------------------------------------------------------------------------------------------------------------------------------------------------------------------------------------------------------------------------------------------------------------------------------------------------------------------------------------------------------------------------------------------------------------------------------------------------------------------------------------------------------------------------------------------------|
| <b>Intervention Terms</b> | <p>“cognitive stimulation” OR “cognitive rehabilitation” OR “cognitive training” OR “cognitive therapy” OR “cognitive retraining” OR “cognitive support” OR “cognitive intervention” OR “cognitive exercise” OR “cognitive strategy” OR “cognitive aid” OR “memory function” OR “memory rehabilitation” OR “memory therapy” OR “memory aid” OR “memory group” OR “memory training” OR “memory retraining” OR “memory support” OR “memory stimulation” OR “memory strategy” OR “memory management” OR “brain training” OR “brain rehabilitation” OR “brain stimulation” OR “brain retraining” OR “brain exercise” OR “neuropsychological training” OR “neuropsychological therapy” OR “neuropsychological strategy” OR “neuropsychological aid” OR “neuropsychological stimulation” OR “neuropsychological rehabilitation” OR “neuropsychological exercise” OR “neuropsychological intervention” OR “neuropsychological retraining” OR “neuropsychological support” OR “psychostimulation” OR “executive training” OR “executive stimulation” OR “executive rehabilitation” OR “attention training” OR “attentional training” OR “attentional rehabilitation” OR “global stimulation” OR “reality orientation”</p> |
| <b>Study Terms</b>        | <p>“RCT” OR “controlled trial” OR random*</p>                                                                                                                                                                                                                                                                                                                                                                                                                                                                                                                                                                                                                                                                                                                                                                                                                                                                                                                                                                                                                                                                                                                                                                     |
| <b>Subject Terms</b>      | <p>“Mild cognitive impairment” OR “memory impairment” OR “cognitive impairment” OR “memory disorder” OR “cognitive disorder” OR “memory dysfunction” OR “cognitive dysfunction” OR “MCI” OR “AAMI” OR “MCD” OR “mild cognitive disorder”</p>                                                                                                                                                                                                                                                                                                                                                                                                                                                                                                                                                                                                                                                                                                                                                                                                                                                                                                                                                                      |

**Supplementary Table 2.** Brief description of the specific outcome measures included in the meta-analysis

| Outcome measure                                              | Domain  | Brief Description                                                                                                                                                                                                              | Study                                                                                                                                                        |
|--------------------------------------------------------------|---------|--------------------------------------------------------------------------------------------------------------------------------------------------------------------------------------------------------------------------------|--------------------------------------------------------------------------------------------------------------------------------------------------------------|
| Mini Mental State Examination (MMSE)                         | GEN COG | A 30-point questionnaire used to estimate severity of cognitive impairment including orientation and memory functions                                                                                                          | Barben et al, 2016<br>Ciarmiello et al. 2015<br>Djabelkhir et al 2017<br>Han et al 2017<br>Hagovska et al. 2015<br>Rozzini et al 2007<br>Savulich et al 2017 |
| Modified Mini Mental State Examination (mMMSE)               | GEN COG | This instrument included all items from the standard MMSE, plus the Wechsler Adult Intelligence Scale–Revised Digit Span subtest and additional attention/calculation and general knowledge, language, and construction items. | Gooding et al 2016 study 1&2                                                                                                                                 |
| Alzheimer’s Disease Assessment Scale-Cognitive (ADAS-Cog)    | GEN COG | Measuring severity of cognitive dysfunction associated with Alzheimer’s disease, and is widely used in pharmacological studies of dementia and MCI. Higher scores indicate more dysfunction.                                   | Fiatarone Singh et al 2014                                                                                                                                   |
| Computerised Assessment of Mild Cognitive Impairment (CAMCI) | GEN COG | A battery of tests to assess cognitive performance including domains of attention, executive functioning, memory and processing speed                                                                                          | Hughes et al 2014                                                                                                                                            |
| Milan Overall Dementia Assessment (MODA)                     | GEN COG | The MODA is a paper and pencil test, composed of three sections: an autonomy scale, a section testing orientation and a section testing a wide range of cognitive domains.                                                     | Ciarmiello et al. 2015                                                                                                                                       |
| 16-item free and cued reminding test                         | MEM     | Participants search a card containing four pictures of items with matched category cues before subjected to tests of free and cued recall                                                                                      | Herrera et al 2012<br>Djabelkhir et al 2017                                                                                                                  |
| BEM-144 recall test                                          | MEM     | A 12-word immediate recall test from BEM-144 memory battery                                                                                                                                                                    | Herrera et al 2012                                                                                                                                           |
| Description of the visual recognition memory task (DMS48)    | MEM     | Participants asked to remember a sample before making a delayed forced-choice match to original sample                                                                                                                         | Herrera et al 2012<br>Ciarmiello et al. 2015                                                                                                                 |

| Outcome measure                                                                               | Domain | Brief Description                                                                                                                                                                                                                                                                                   | Study                                                               |
|-----------------------------------------------------------------------------------------------|--------|-----------------------------------------------------------------------------------------------------------------------------------------------------------------------------------------------------------------------------------------------------------------------------------------------------|---------------------------------------------------------------------|
| Doors Recognition subtest                                                                     | MEM    | Participants are shown a variety of different coloured doors which they must remember and later recognise from a selection of similar doors                                                                                                                                                         | Herrera et al 2012                                                  |
| MMSE - Recall Test                                                                            | MEM    | Participants presented with stimuli before being asked to recall as many as possible                                                                                                                                                                                                                | Herrera et al 2012                                                  |
| Paired-associates learning (PAL)                                                              | MEM    | Visual patterns revealed in different boxes before participant tested on where pattern originally located                                                                                                                                                                                           | Finn & McDonald 2011<br>Finn & McDonald 2015<br>Savulich et al 2017 |
| Pattern Recognition Memory (PRM)                                                              | MEM    | Test of visual pattern recognition in a forced discrimination paradigm                                                                                                                                                                                                                              | Finn & McDonald 2011                                                |
| Recall of Rey's Complex Figure                                                                | MEM    | Subjects shown complex figure and then tested on their delayed recall of the figure                                                                                                                                                                                                                 | Herrera et al 2012<br>Rozzini et al 2007                            |
| Rey's figure copy                                                                             | MEM    | Participants are to reproduce a drawing by i) copying (reproduction) and ii) memory (recall) using a 18-point scoring system                                                                                                                                                                        | Rozzini et al 2007                                                  |
| List Learning Memory Sum from ADAS-Cog                                                        | MEM    | List learning assessed across the three memory recall trials of the ADAS-Cog. Higher scores indicate better memory.                                                                                                                                                                                 | Fiatarone Singh et al 2014                                          |
| Benton Visual Retention Test-Revised (BVRT-R)                                                 | MEM    | BVRT-R is a visual memory test which assesses visual perception and visual constructional abilities as participants are required to draw from memory simple designs. Higher scores indicate better function.                                                                                        | Fiatarone Singh et al 2014<br>Savulich et al 2017                   |
| The Logical Memory subtest of the Wechsler Memory Scale 3rd edition (immediately and delayed) | MEM    | The logic memory is used to measure both immediate (I) and delayed (II) memory for verbal information. Participants are presented with a simple narrative and are required to recall as many details of the story as they can immediately after presentation. Higher scores indicate better memory. | Fiatarone Singh et al 2014                                          |
| Rey Auditory Verbal Learning Test (RAVLT)                                                     | MEM    | RAVLT includes a list of 15 words to be recalled immediately after each of the 5 verbal presentations and after a 30-min delay                                                                                                                                                                      | Barben et al, 2016<br>Ciarmiello et al. 2015                        |
| Prose memory                                                                                  | MEM    | A subset of The Memory Assessment Scales, is an auditory verbal prose recall task which requires the subject to recall a short story. Subjects are asked to recall the story from memory and are then asked nine questions about details of the story.                                              | Ciarmiello et al. 2015                                              |

1  
2  
3

| 4 Outcome measure                                                      | 5 Domain | 6 Brief Description                                                                                                                                                                                                                                                                                                                                                                                                  | 7 Study                      |
|------------------------------------------------------------------------|----------|----------------------------------------------------------------------------------------------------------------------------------------------------------------------------------------------------------------------------------------------------------------------------------------------------------------------------------------------------------------------------------------------------------------------|------------------------------|
| 8 visuospatial memory test<br>9 (VST)                                  | MEM      | From the Cognitive Efficiency Profile                                                                                                                                                                                                                                                                                                                                                                                | Djabelkhir et al 2017        |
| 10 Buschke Selective Reminding Test<br>11 (BSRT)                       | MEM      | The test provides 12 words which are selectively rehearsed by the subject until they are memorized. That is, only those words not recalled on the immediately preceding trial are presented. The subject then attends to an interference task or verbal list. Subsequently, after a delay, the subject is asked to recall the words.                                                                                 | Gooding et al 2016 study 1&2 |
| 12<br>13<br>14 WMS-R Visual Reproductions<br>15 (VR) I and II subtests | MEM      | VR assesses visual memory. Cards with printed designs is shown to the participants. Following each exposure and a 30 minutes delay, subjects draw what they remember of the design.                                                                                                                                                                                                                                  | Gooding et al 2016 study 1&2 |
| 16<br>17 WMS-R Logical Memory<br>18 (LM)Subtests I and II subtests     | MEM      | LM. The examiner reads two stories, stopping after each reading for an immediate free recall. And a 30 minutes delayed recall.                                                                                                                                                                                                                                                                                       | Gooding et al 2016 study 1&2 |
| 19<br>20 Short Story                                                   | MEM      | Participants are asked to recall a short story                                                                                                                                                                                                                                                                                                                                                                       | Rozzini et al 2007           |
| 21<br>22<br>23<br>24<br>25 The Word List Memory Test (WLMT)            | MEM      | Word list task that contains 10 semantically unrelated words The words are presented to the subject one at a time and are read aloud Three trials are administered in this fashion, with the order of the 10 words being randomized for each trial The examiner records the order of recall and notes any intrusions that might occur The primary Indices of Interest are the number of words recalled on each trial | Han et al 2017               |
| 26<br>27<br>28<br>29 The Word List Recall Test (WLRT)                  | MEM      | Words, displayed one at a time for one second each. Participants read each of the words, and try to remember them without taking notes.                                                                                                                                                                                                                                                                              | Han et al 2017               |
| 30<br>31<br>32<br>33<br>34<br>35 WLRcT(The Word List Recognition)      | MEM      | A word list was designed so that half its words would denote targets when any of a number of target classes were defined. After scanning this list for targets, subjects were unexpectedly tested on their ability to recognize the words they had scanned.                                                                                                                                                          | Han et al 2017               |

36  
37  
38  
39  
40  
41  
42  
43  
44  
45  
46

| Outcome measure                | Domain | Brief Description                                                                                                                                                                                                                                                                                                                                                                                                                                                                                    | Study                                       |
|--------------------------------|--------|------------------------------------------------------------------------------------------------------------------------------------------------------------------------------------------------------------------------------------------------------------------------------------------------------------------------------------------------------------------------------------------------------------------------------------------------------------------------------------------------------|---------------------------------------------|
| RBANS Memory Score             | MEM    | It consists of 12 subtests, which yield five Index scores (i.e., Attention, Language, Visuospatial/Constructional, Immediate Memory, and Delayed Memory) and a Total Scale score.                                                                                                                                                                                                                                                                                                                    | Rosen et al 2011                            |
| Dot counting test              | WM     | The task dot counting requires examinees to count the dots as quickly as possible by the fastest means possible.                                                                                                                                                                                                                                                                                                                                                                                     | Lin et al 2016                              |
| 1-back test                    | WM     | In the 1-Back task, participants are presented a sequence of stimuli one-by-one. For each stimulus, they need to decide if the current stimulus is the same as the one presented 1 trials ago.                                                                                                                                                                                                                                                                                                       | Lin et al 2016                              |
| Digit Span Test                | WM     | Sequence of digits is read aloud. Subjects asked to immediately recall digits in the correct order. If correct, a sequence with an additional digit is presented.                                                                                                                                                                                                                                                                                                                                    | Herrera et al 2012<br>Ciarmiello et al 2015 |
| LNS (Letter-Number Sequencing) | WM     | The task involves listening to and remembering a string of digits and letters read aloud at a speed of one per second, then recalling the information by repeating the numbers in chronological order, followed by the letters in alphabetical order.                                                                                                                                                                                                                                                | Hyer et al 2016                             |
| Spatial Span                   | WM     | Participants tested on ability to remember the location of objects on a spatial grid.                                                                                                                                                                                                                                                                                                                                                                                                                | Hyer et al 2016                             |
| Spatial Span (Corsi test)      | WM     | Corsi is a short term memory task conceptually similar to the digit span test. the experimenter (the person who carries out the study) shows nine blocks arranged in front of the participant, the experimenter taps a sequence of blocks (for example, the experimenter taps a sequence of 3 different blocks, one after another), the participant needs to tap the blocks that the experimenter showed, in the same order, steps 1-3 are repeated multiple times with different lengths of blocks. | Ciarmiello et al. 2015                      |
| Spatial working memory (SWM)   | WM     | A test that requires retention and manipulation of visuospatial information to collect 'tokens' and fill a column                                                                                                                                                                                                                                                                                                                                                                                    | Finn & McDonald 2011                        |

1  
2  
3  
4  
5  
6  
7  
8  
9  
10  
11  
12  
13  
14  
15  
16  
17  
18  
19  
20  
21  
22  
23  
24  
25  
26  
27  
28  
29  
30  
31  
32  
33  
34  
35  
36  
37  
38  
39  
40  
41  
42  
43  
44  
45  
46

| Outcome measure                             | Domain | Brief Description                                                                                                                                                                                                                                                                                                                                                                                                                                                                    | Study                                                                              |
|---------------------------------------------|--------|--------------------------------------------------------------------------------------------------------------------------------------------------------------------------------------------------------------------------------------------------------------------------------------------------------------------------------------------------------------------------------------------------------------------------------------------------------------------------------------|------------------------------------------------------------------------------------|
| Symbol Span                                 | WM     | This subtest assesses visual working memory using novel visual stimuli. Beginning with two symbols, abstract visual symbols are exposed for 5 seconds. In the test phase, the participant has to correctly recall not only the correct symbols from distractor items, but also the order in which they were presented from left to right. The number of symbols presented increases by one at intervals as the test progresses. Higher scores indicate better visual working memory. | Finn & McDonald et al 2015                                                         |
| Word span                                   | WM     | Participants tested on ability to remember a list of words in order.                                                                                                                                                                                                                                                                                                                                                                                                                 | Ciarmiello et al. 2015                                                             |
| Alpha span task                             | WM     | In the alpha span test, short lists of words are presented and the participant's task is to mentally reorder the words and give them back in correct alphabetical order.                                                                                                                                                                                                                                                                                                             | Ciarmiello et al. 2015                                                             |
| Intra-/extra-dimensional set shifting (IED) | EXE    | A test of rule acquisition and reversal. It is computerised analogue of the Wisconsin Card Sorting test and measured the total errors made                                                                                                                                                                                                                                                                                                                                           | Finn & McDonald 2011                                                               |
| Modified Dual Task                          | EXE    | Participants completed a modified dual task consisting of a visual detection task (responding to an appearance of a stimuli) and alpha-arithmetic task (responding 'true' or 'false' to equations of letters and numbers e.g. 'U-1 = T') simultaneously and were recorded in accuracy of responses in each task                                                                                                                                                                      | Gagnon & Belleville 2012                                                           |
| Raven's coloured matrices                   | EXE    | 60 patterns present in order of difficulty. Subjects asked to identify the missing element that completes a pattern.                                                                                                                                                                                                                                                                                                                                                                 | Rozzini et al 2007                                                                 |
| Telephone Search Dual Task                  | EXE    | Participants complete the telephone search test whilst simultaneously counting audible tones.                                                                                                                                                                                                                                                                                                                                                                                        | Gagnon & Belleville 2012                                                           |
| Telephone Search Test                       | EXE    | Participants circle key stimuli while searching entries in a simulated classified telephone directory.                                                                                                                                                                                                                                                                                                                                                                               | Gagnon & Belleville 2012                                                           |
| Trial making test                           | EXE    | The task requires participants to 'connect the dots' in two parts, firstly numerically and secondly, alphanumerically.                                                                                                                                                                                                                                                                                                                                                               | Gagnon & Belleville 2012, Hughes et al 2014, Djabelkhir et al 2017 Hyer et al 2016 |

1  
2  
3  
4  
5  
6  
7  
8  
9  
10  
11  
12  
13  
14  
15  
16  
17  
18  
19  
20  
21  
22  
23  
24  
25  
26  
27  
28  
29  
30  
31  
32  
33  
34  
35  
36  
37  
38  
39  
40  
41  
42  
43  
44  
45  
46

| Outcome measure                                       | Domain | Brief Description                                                                                                                                                                                                                                                                                                                                                                          | Study                                               |
|-------------------------------------------------------|--------|--------------------------------------------------------------------------------------------------------------------------------------------------------------------------------------------------------------------------------------------------------------------------------------------------------------------------------------------------------------------------------------------|-----------------------------------------------------|
| Verbal fluency                                        | EXE    | Participants generate as many words in one minute from a given letter.                                                                                                                                                                                                                                                                                                                     | Rozzini et al 2007, Djabelkhir et al 2017           |
| Visual Elevator Test                                  | EXE    | Participants count up and down according to visual stimuli in an elevator, the time-per-direction-change score was calculated.                                                                                                                                                                                                                                                             | Gagnon & Belleville 2012                            |
| Raven's progressive matrices - non-verbal test (PM47) | EXE    | The Raven Standard Progressive Matrices (PM47) assess the measure the test taker's reasoning ability.                                                                                                                                                                                                                                                                                      | Ciarmiello et al. 2015                              |
| Rey–Osterrieth complex figure test (ROCF)             | EXE    | ROCF is a neuropsychological assessment in which examinees are asked to reproduce a complicated line drawing, first by copying it freehand (recognition), and then drawing from memory (recall). The test therefore permits the evaluation of different functions, such as such as visuospatial abilities, memory, attention, planning, working memory and executive functions.            | Ciarmiello et al. 2015                              |
| Categorical verbal fluency (animals)                  | EXE    | Participants generate as many animal names as possible in one minute.                                                                                                                                                                                                                                                                                                                      | Fiatarone Singh et al 2014<br>Djabelkhir et al 2017 |
| Number sequencing<br>Number-Letter switching          | EXE    | In Number Sequencing, the participant is asked to draw a line connecting numbers in order from low to high as quickly as possible without making mistakes, and is a measure of attention. In Number-Letter switching, the task is to switch between connecting numbers and letters, in order, from lowest to highest, e.g., 1-A, 2-B, 3-C etc., and is a measure of cognitive flexibility. | Finn & McDonald et al 2015                          |
| Tracking A, Tracking B                                | EXE    | Two tracking tasks requiring participants to (1) track numbers (from 24-1) in reverse order (Tracking A), and (2) months forward (January – December) and numbers in reverse (Tracking B).                                                                                                                                                                                                 | Hughes et al 2014                                   |
| Useful field of view (UFOV)                           | EXE    | UFOV is a computerized test assessing visual processing speed and attention.                                                                                                                                                                                                                                                                                                               | Lin et al 2016                                      |
| Verbal fluency                                        | EXE    | Phonemic and categorical fluency                                                                                                                                                                                                                                                                                                                                                           | Lin et al 2016                                      |
| Cognitive control                                     | EXE    | Set shifting and flanker tasks                                                                                                                                                                                                                                                                                                                                                             | Lin et al 2016                                      |

1  
2  
3  
4  
5  
6  
7  
8  
9  
10  
11  
12  
13  
14  
15  
16  
17  
18  
19  
20  
21  
22  
23  
24  
25  
26  
27  
28  
29  
30  
31  
32  
33  
34  
35  
36  
37  
38  
39  
40  
41  
42  
43  
44  
45  
46

| Outcome measure                    | Domain | Brief Description                                                                                                                                                                                                                                                                                                                                                                                        | Study                      |
|------------------------------------|--------|----------------------------------------------------------------------------------------------------------------------------------------------------------------------------------------------------------------------------------------------------------------------------------------------------------------------------------------------------------------------------------------------------------|----------------------------|
| Cross-modality dual task (Divided) | EXE    | Participants were subjected to a dual-task simultaneously consisting of a visual detection (as above) with a digit span task (orally recalling a list of digits) and recorded span items recalled correctly in %.                                                                                                                                                                                        | Gagnon & Belleville 2012   |
| The CANTAB CRT(speed)              | EXE    | It is used to assess motor speed and thus acts as a control measure of general alertness to help interpret other cognitive tasks. An arrow will appear on either the left or right side of a computer screen. After the arrow appears, the participant is instructed to press a corresponding left or right button, using a response box, as quickly as possible.                                        | Savulich et al 2017        |
| WAIS-III Similarities              | EXE    | WAIS Similarities is a subtest from the WAIS-III used to measure verbal conception formation and abstractive thinking. Higher scores indicate better function.                                                                                                                                                                                                                                           | Fiatarone Singh et al 2014 |
| WAIS-III Matrices                  | EXE    | WAIS Matrices is a perceptual subtest of the Wechsler Adult Intelligence Scale–III and is used to assess executive functions posing four types of non-verbal reasoning tasks including pattern completion, classification, abstraction and serial reasoning, and all items require visual perception, organization, and synthesis of visual spatial information. Higher scores indicate better function. | Fiatarone Singh et al 2014 |
| COWAT                              | EXE    | Combined Oral Word Association Test is a language-based task assessing association fluency, and is often used as a measure of executive functioning. The most commonly used letters are F, A, and S. or C, F, and L, based upon word prevalence rates. Higher scores indicate better function.                                                                                                           | Fiatarone Singh et al 2014 |
| SDMT (Attention/speed)             | EXE    | Symbol Digit Modalities Test measures divided attention, visual scanning, tracking, and motor speed. It uses a substitution format presenting symbols with matching numbers, and participants are required to provide name the numbers corresponding to each given symbol. Higher scores indicate better function.                                                                                       | Fiatarone Singh et al 2014 |

Notes: General cognition (GEN COG), episodic memory (MEM), working memory (WM), executive function (EXE)



**Supplementary Table 3.** Detailed Characteristics of studies using computerised cognitive training in persons with MCI

| Author and Year            | Treatment Group N, % male, mean age, mean education, MMSE (SD)                       | Control Group N, ratio of male, mean age, mean education, MMSE (SD)                   | CCT type for EC and type of CC                                          | Frequency, duration and total hours                                       | Drop-out (%)                  | Cognitive Training Intervention                                                                                                                                                                                | Assessment interval (time pre or post intervention) | Included for meta-analysis |
|----------------------------|--------------------------------------------------------------------------------------|---------------------------------------------------------------------------------------|-------------------------------------------------------------------------|---------------------------------------------------------------------------|-------------------------------|----------------------------------------------------------------------------------------------------------------------------------------------------------------------------------------------------------------|-----------------------------------------------------|----------------------------|
| <b>Barban et al 2016</b>   | N = 46<br>Ratio = 54.3%<br>Age = 74.4 (5.7)<br>Edu = 9 (4.3)<br>MMSE = 27.3 (2.1)    | N = 60<br>Ratio = 51.7%<br>Age = 72.9 (6.0)<br>Edu = 11 (4.7)<br>MMSE = 28.1 (1.4)    | EC: multi domain training.<br>CC: passive(rest)                         | 60 minute sessions, 2 sessions per week for 3 months.<br>Total = 24 hours | n/s                           | Computerised software: 'SOCIALE' using touch screen. Multi-component - CT including Memory, attentional Executive Function, orientation, logical reasoning, constructional Praxis, language.                   | Before and after training, follow-up (n/s)          | Yes                        |
| <b>Chandler et al 2017</b> | N = 27<br>Ratio = 73.3%<br>Age = 77.4 (7.2)<br>Edu = 16.2 (2.6)<br>MMSE = 26.7 (3.0) | N = 30<br>Ratio = 50.0 %<br>Age = 76.2 (7.0)<br>Edu = 16.0 (2.4)<br>MMSE = 25.8 (3.2) | EC: Auditory memory training<br>CC: Active(Memory Support System (MSS)) | Frequency: n/s<br>Duration: n/s<br>Total = 10 hours                       | EC:4<br>CC:3<br>Total:10.94 % | "Auditory Brain Training" software: 6 adaptive modules exercises to recognize and differentiate sounds, match or repeat sounds, remember increasingly difficult directions, and remember details from stories. | n/s                                                 | No*                        |

| Author and Year              | Treatment Group N, % male, mean age, mean education, MMSE (SD)                                          | Control Group N, ratio of male, mean age, mean education, MMSE (SD)                                     | CCT type for EC and type of CC                                                | Frequency, duration and total hours                                         | Drop-out (%)                  | Cognitive Training Intervention                                                                                                                                                                   | Assessment interval (time pre or post intervention)                                                 | Included for meta-analysis |
|------------------------------|---------------------------------------------------------------------------------------------------------|---------------------------------------------------------------------------------------------------------|-------------------------------------------------------------------------------|-----------------------------------------------------------------------------|-------------------------------|---------------------------------------------------------------------------------------------------------------------------------------------------------------------------------------------------|-----------------------------------------------------------------------------------------------------|----------------------------|
| <b>Ciarmiello et al 2015</b> | N = 15<br>Ratio = 35.7%<br>Age = 71.2 (7.7)<br>Edu = 9.3 (3.02)<br>MMSE = 27.9 (1.8)                    | N = 15<br>Ratio = 46.7%<br>Age = 72.0 (7.1)<br>Edu = 7.8 (2.6)<br>MMSE = 27.8(1.9)                      | EC: multi domain<br>CC: semi-active (meeting with psychologist – no computer) | 45 minute sessions, 2 days per week for 4 months.<br>Total = 24 hours.      | EC: 0<br>CC: 0<br>0%          | Computerised training with multiple difficulty levels. Includes dual-task training, executive function training, working memory updating, visual exploration, spatial orienting tasks.            | Before and after training follow-up (n/s)                                                           | Yes                        |
| <b>Djabelkhjr et al 2017</b> | N = 10<br>Ratio = 30.0 %<br>Age = 75.2 (6.4)<br>Edu = 60.0% (6) (of college level)<br>MMSE = 27.7 (1.9) | N = 10<br>Ratio = 40.0 %<br>Age = 78.2 (7.0)<br>Edu = 44.4% (4) (of college level)<br>MMSE = 27.4 (2.0) | EC: multi-domain<br>CC: Active(multi-component)                               | 90 mins per session<br>1 sessions/week, 12 weeks.<br>Total = 18 hours.      | EC: 1<br>CC: 0<br>Total: 5%   | 'KODRO' (Altera-Group, Paris, France), a web-based platform with several applications (ie, appointment and event reminding, cognitive games, communication, entertainment, videos and a library). | Before and after training. Follow-up (n/s)                                                          | Yes                        |
| <b>Fiatarone et al. 2014</b> | N = 24<br>Ratio = n/s<br>Age = >55<br>Edu = n/s<br>MMSE = 28.0 (2.0)                                    | N = 27<br>Ratio = n/s<br>Age = >55<br>Edu = n/s<br>MMSE = 27.0 (2.0)                                    | EC: multi domain<br>CC: active (sham)                                         | 75 minute sessions, 2 or 3 days per week for 26 weeks.<br>Total = 80 hours. | EC: 2<br>CC: 3<br>Total: 9.8% | COGPACK program: Computer-based multimodal and multi domain exercises targeting memory, executive function, attention, and speed of information processing                                        | At baseline and 6 months and at least 72 hours after the previous training session<br>Follow-up: at | Yes                        |

| Author and Year                 | Treatment Group N, % male, mean age, mean education, MMSE (SD)                      | Control Group N, ratio of male, mean age, mean education, MMSE (SD)                 | CCT type for EC and type of CC                 | Frequency, duration and total hours                                                        | Drop-out (%)                   | Cognitive Training Intervention                                                                                                      | Assessment interval (time pre or post intervention) | Included for meta-analysis |
|---------------------------------|-------------------------------------------------------------------------------------|-------------------------------------------------------------------------------------|------------------------------------------------|--------------------------------------------------------------------------------------------|--------------------------------|--------------------------------------------------------------------------------------------------------------------------------------|-----------------------------------------------------|----------------------------|
|                                 |                                                                                     |                                                                                     |                                                |                                                                                            |                                |                                                                                                                                      | 18 months                                           |                            |
| <b>Finn &amp; McDonald 2011</b> | N = 8<br>ratio = 37.5%<br>age = 69.0 (7.7)<br>Edu = 13.3 (2.2)<br>MMSE = 28.5 (2.3) | N = 8<br>ratio = 62.5%<br>age = 76.4 (6.5)<br>Edu = 12.0 (2.8)<br>MMSE = 27.5 (2.4) | EC: Multi-domain<br>CC: Waiting list (Passive) | 30 minute sessions, 4-5 sessions a week for an average of 11.43 weeks.<br>Total = 25 hours | EC: 4<br>CC: 5<br>Total: 32%   | Lumosity Inc CCT package.<br>Four broad cognitive domains targeted: attention, processing speed, visual memory and cognitive control | Before and after training<br>Follow-up (n/s)        | Yes                        |
| <b>Finn &amp; McDonald 2015</b> | N = 12<br>ratio = 66%<br>age = 72.8 (5.7)<br>Edu = 13.8 (3.0)<br>MMSE = 27.8 (1.3)  | N = 12<br>ratio = 75%<br>age = 75.1 (7.5)<br>Edu = 13.7 (2.8)<br>MMSE = 27.8 (1.9)  | EC: Single memory domain<br>CC: Passive        | 2 sessions per week for 4 weeks<br>Total = n/s                                             | EC: 4<br>CC: 3<br>Total: 22.6% | Repetition-lag training to improve recollection memory                                                                               | First and last training session<br>Follow-up (n/s)  | Yes                        |

| Author and Year                     | Treatment Group N, % male, mean age, mean education, MMSE (SD)                     | Control Group N, ratio of male, mean age, mean education, MMSE (SD)                | CCT type for EC and type of CC                        | Frequency, duration and total hours                                         | Drop-out (%)                    | Cognitive Training Intervention                                                                                                     | Assessment interval (time pre or post intervention)    | Included for meta-analysis |
|-------------------------------------|------------------------------------------------------------------------------------|------------------------------------------------------------------------------------|-------------------------------------------------------|-----------------------------------------------------------------------------|---------------------------------|-------------------------------------------------------------------------------------------------------------------------------------|--------------------------------------------------------|----------------------------|
| <b>Gagnon &amp; Belleville 2012</b> | N = 12<br>ratio = n/s<br>age = 67.0 (7.8)<br>Edu = 15.0 (4.6)<br>MMSE = 28.1 (1.2) | N = 12<br>ratio = n/s<br>age = 68.4 (6.0)<br>Edu = 13.1 (5.7)<br>MMSE = 27.8 (1.5) | EC: Single domain (attentional control)<br>CC: Active | 60 minute sessions, 3 times a week for 2 weeks.<br>Total = 6 hours          | EC: 1<br>CC: 1<br>Total: 8%     | Programme targeting attentional control using Variable Priority (VP) training in a dual task with selected priorities and feedback. | One week pre and after intervention<br>Follow-up (n/s) | Yes                        |
| <b>Gooding et al 2016 study 1</b>   | N = 31<br>ratio = 58.1%<br>age = 75.6 (8.8)<br>Edu = 15.1 (2.6)<br>MMSE = n/s      | N = 10<br>ratio = 58.1%<br>age = 75.6 (8.8)<br>Edu = 15.1 (2.6)<br>MMSE = n/s      | EC: Multi-domain<br>CC: Active                        | 60 min sessions, two days per week for 16 weeks<br>Total = approx. 30 hours | EC: 12<br>CC: 1<br>Total: 20.3% | Posit Science's BrainFitness – repeated drill-and-practice adaptive exercises involving memory, attention and executive functions.  | Before and after training<br>Follow-up (n/s)           | Yes                        |
| <b>Gooding et al 2016 study 2</b>   | N = 23<br>ratio = 58.1%<br>age = 75.6 (8.8)<br>Edu = 15.1 (2.6)<br>MMSE = n/s      | N = 10<br>ratio = 58.1%<br>age = 75.6 (8.8)<br>Edu = 15.1 (2.6)<br>MMSE = n/s      | EC: Multi-domain<br>CC: Active                        | 60 min sessions, two days per week for 16 weeks<br>Total = approx. 30 hours | EC: 12<br>CC: 1<br>Total: 20.3% | Posit Science's BrainFitness – repeated drill-and-practice adaptive exercises involving memory, attention and executive functions.  | Before and after training<br>Follow-up (n/s)           | Yes                        |

| Author and Year     | Treatment Group N, % male, mean age, mean education, MMSE (SD)                                          | Control Group N, ratio of male, mean age, mean education, MMSE (SD)                                     | CCT type for EC and type of CC                                             | Frequency, duration and total hours                                                  | Drop-out (%)                  | Cognitive Training Intervention                                                                                                                                                  | Assessment interval (time pre or post intervention) | Included for meta-analysis |
|---------------------|---------------------------------------------------------------------------------------------------------|---------------------------------------------------------------------------------------------------------|----------------------------------------------------------------------------|--------------------------------------------------------------------------------------|-------------------------------|----------------------------------------------------------------------------------------------------------------------------------------------------------------------------------|-----------------------------------------------------|----------------------------|
| Hagovska et al 2016 | N = 40<br>ratio = 55%<br>age = 68.0 (4.4)<br>Edu = 75% of secondary education<br>MMSE = 26.0 (2.6)      | N = 40<br>ratio = 48%<br>age = 65.9 (6.2)<br>Edu = 70% of secondary education<br>MMSE = 26.0 (1.5)      | EC: Multi domain + balance training<br>CC: Passive( just balance training) | 30 minute sessions, 2 times a week for 10 weeks.<br>Total = 10 hours                 | EC: 0<br>CC: 2<br>Total: 2.5% | CogniPlus training program<br>Battery contains subprograms for attention, Working Memory, long-term memory, executive functions, spatial processing and visuomotor coordination. | Before and after training<br>Follow-up (n/s)        | Yes                        |
| Han et al 2017      | N = 23<br>Ratio = 56.5%<br>Age = 73.7 (4.8)<br>Edu = 13.5 (3.2)<br>MMSE = 25.7 (3.2)                    | N = 20<br>Ratio = 50.0%<br>Age = 74.5 (6.4)<br>Edu = 12.7 (3.7)<br>MMSE=24.5 (2.4)                      | EC: single memory training<br>CC: Passive (Usual Care)                     | 30 min per session<br>1 hour per day<br>2 sessions/week, 4 weeks.<br>Total = 4 hours | EC:3<br>CC:5<br>Total: 16%    | USMART program involving spaced retrieval-based memory training, using a self-administered application on an iPad tablet.                                                        | Week 0, 5<br>Follow-up (n/s)#                       | Yes                        |
| Herrera et al 2012  | N = 11<br>ratio = 54%<br>age = 75.1 (2.0)<br>Edu = 46% of secondary school or more<br>MMSE = 27.4 (0.5) | N = 11<br>ratio = 45%<br>age = 78.2 (1.4)<br>Edu = 63% of secondary school or more<br>MMSE = 27.2 (0.4) | EC: Multidomain<br>CC: Active                                              | 60 minute sessions, 2 days a week for 12 weeks.<br>Total = 24 hours                  | 0%                            | Several computer-based training exercises designed to improve memory and attention                                                                                               | 0, 12 weeks ± 15 days<br>Follow-up: at 24 weeks     | Yes                        |

| Author and Year   | Treatment Group N, % male, mean age, mean education, MMSE (SD)                            | Control Group N, ratio of male, mean age, mean education, MMSE (SD)                       | CCT type for EC and type of CC                                                          | Frequency, duration and total hours                                            | Drop-out (%)                   | Cognitive Training Intervention                                                                                                                                                          | Assessment interval (time pre or post intervention)                 | Included for meta-analysis |
|-------------------|-------------------------------------------------------------------------------------------|-------------------------------------------------------------------------------------------|-----------------------------------------------------------------------------------------|--------------------------------------------------------------------------------|--------------------------------|------------------------------------------------------------------------------------------------------------------------------------------------------------------------------------------|---------------------------------------------------------------------|----------------------------|
| Hughes et al 2014 | N = 10<br>ratio = 20%<br>age = 78.5 (7.1)<br>Edu = 13.8 (2.4)<br>MMSE = 27.2 (1.9)        | N = 10<br>ratio = 40%<br>age = 76.2 (4.3)<br>Edu = 13.1 (1.9)<br>MMSE = 27.1 (1.8)        | EC:<br>Multidomain<br>CC: Active                                                        | 90 minute sessions, once a week for 24 weeks. Total = 36 hours                 | 0%                             | Group-based Nintendo Wii sports package. Group-based Interactive video gaming                                                                                                            | 0, 24 weeks ± 1 weeks<br>Follow-up: (n/s)                           | Yes                        |
| Hyer et al. 2016  | N = 34<br>ratio = 50%<br>age = 75.1 (7.4)<br>Edu = 70% secondary<br>MMSE = n/s            | N = 34<br>ratio = 44%<br>age = 75.2 (7.8)<br>Edu = 66% secondary<br>MMSE = n/s            | EC: Single domain (working memory)<br>CC: Active (Sham)                                 | 25 days of 40 min sessions, completed over 5 to 7 weeks. Total = 16.7 hours    | EC: 4<br>CC: 5<br>Total: 11.7% | Cogmed – adaptive WM training                                                                                                                                                            | Before and after training<br>Follow-up: 3 months after intervention | Yes                        |
| Lin et al 2016    | N = 10<br>Ratio = 50.0%<br>Age = 72.9 (8.2)<br>Edu = 90.0% of college level<br>MMSE = n/s | N = 11<br>Ratio = 54.5%<br>Age = 73.1 (9.6)<br>Edu = 54.5% of college level<br>MMSE = n/s | EC: Single domain speed-of-processing<br>CC: active control (mental leisure activities) | 1 hour per day<br>4 days per week for 6 weeks in their homes. Total = 24 hours | EC:2<br>CC:1<br>Total: 12.5%   | INSIGHT online program: (vision-based speed-of-processing) which included five training tasks: eye for detail, peripheral challenge, visual sweeps, double decision, and target tracker. | Before and after training<br>Follow-up (n/s)#                       | Yes                        |

| Author and Year   | Treatment Group N, % male, mean age, mean education, MMSE (SD)                       | Control Group N, ratio of male, mean age, mean education, MMSE (SD)                | CCT type for EC and type of CC                                                                    | Frequency, duration and total hours                                    | Drop-out (%)                   | Cognitive Training Intervention                      | Assessment interval (time pre or post intervention)                 | Included for meta-analysis |
|-------------------|--------------------------------------------------------------------------------------|------------------------------------------------------------------------------------|---------------------------------------------------------------------------------------------------|------------------------------------------------------------------------|--------------------------------|------------------------------------------------------|---------------------------------------------------------------------|----------------------------|
| Optale et al 2010 | N = 15<br>ratio = 59.1%<br>age = 78.5 (10.9)<br>Edu = 5.3 (2.4)<br>MMSE = 22.9 (5.0) | N = 16<br>ratio = 31.25%<br>age = 81.6 (5.0)<br>Edu = 6 (3.5)<br>MMSE = 21.0 (4.8) | EC: Single domain - Memory<br>CC: Active                                                          | 30 minute sessions, 3 times a week for 3 months.<br>Total = 58.5 hours | EC: 3<br>CC: 2<br>Total: 16.1% | A Virtual Reality-based memory training programme    | Before and after training<br>Follow-up: 3 months after intervention | No**                       |
| Rosen et al 2011  | N = 6<br>ratio = n/s<br>age = 70.7 (10.6)<br>Edu = 16.7 (0.8)<br>MMSE = 29.3 (1.2)   | N = 6<br>ratio = n/s<br>age = 78.0 (7.9)<br>Edu = 18.3 (1.5)<br>MMSE = 27.8 (2.3)  | EC: processing speed and accuracy in auditory processing<br>CC: computer-based activities(Active) | 100 minute sessions, 5 times a week for 8 weeks.<br>Total = 36 hours   | 0%                             | processing speed and accuracy in auditory processing | Before and after training<br>Follow-up (n/s)                        | Yes                        |

| Author and Year            | Treatment Group N, % male, mean age, mean education, MMSE (SD)                                         | Control Group N, ratio of male, mean age, mean education, MMSE (SD)                                    | CCT type for EC and type of CC                                        | Frequency, duration and total hours                                                    | Drop-out (%) | Cognitive Training Intervention                                                                | Assessment interval (time pre or post intervention)                           | Included for meta-analysis |
|----------------------------|--------------------------------------------------------------------------------------------------------|--------------------------------------------------------------------------------------------------------|-----------------------------------------------------------------------|----------------------------------------------------------------------------------------|--------------|------------------------------------------------------------------------------------------------|-------------------------------------------------------------------------------|----------------------------|
| <b>Rozzini et al 2007</b>  | N = 15<br>ratio = n/s<br>age = 63 - 78<br>Edu = n/s<br>MMSE = 26.0 (1.6)                               | N = 22<br>ratio = n/s<br>age = 63 - 78<br>Edu = n/s<br>MMSE = 26.4 (1.9)                               | EC:<br>Multidomain and medication<br>CC:<br>Medication only (Passive) | 60 minute session, 5 days a week for 4 weeks in 3 discrete blocks.<br>Total = 60 hours | 0%           | Cognitive exercises based on Neuropsychology Training combined with a cholinesterase inhibitor | Before and after training<br>Follow-up (n/s)                                  | Yes                        |
| <b>Savulich et al 2017</b> | N = 21<br>Ratio = 52.4%<br>Age = 75.2 (7.4)<br>Edu = 15.9 (1.3) (Age left school)<br>MMSE = 26.6 (2.9) | N = 21<br>Ratio = 66.7%<br>Age = 76.9 (8.3)<br>Edu = 16.0 (2.1) (Age left school)<br>MMSE = 26.8 ± 2.2 | EC: a novel memory game<br>CC: negative (clinic visits as usual)      | 1 hour per session, 8 hours within 4 weeks.<br>Total = 8 hours.                        | 0%           | Gameshow program: Computer-based episodic memory training.                                     | At a maximum of 4 weeks after the baseline testing session<br>Follow-up (n/s) | Yes                        |

Notes: MMSE: Mini Mental State Examination, SD: Standard deviation, n/s: not stated, EC: Experimental condition, CC: Control condition. \*Excluded from meta-analysis due to immediate cognitive outcomes not stated, \*\* Excluded from meta-analysis due to suspected inclusion of individuals with AD.



## Supplementary Appendix 1

### Statistical methods

#### Effect size calculation

Effect sizes were calculated using RevMan software version 5.3. Standardised mean differences were calculated using Hedges' adjusted  $g^1$ . Pre-intervention standard deviations were used as these are most likely to be comparable across studies and therefore provide the most accurate estimate of effect size.<sup>3</sup>

The Hedges' adjusted  $g$  formula used in RevMan is as follows:

$$g = [M_{\text{post intervention}} - M_{\text{post control}} / SD_{\text{pre-pooled}}] * [1 - 3 / (4N - 9)]$$

Where  $N = n_{\text{intervention group}} + n_{\text{control group}}$

and

$$SD_{\text{pre-pooled}} = \sqrt{[(n_{\text{intervention-1}}) SD_{\text{pre intervention}}^2 + (n_{\text{control-1}}) SD_{\text{pre control}}^2] / N - 2}$$

#### Meta-analyses

1  
2  
3 Meta-analyses were performed using RevMan software version 5.3. A random effects method as described by DeSirmonian and Laird<sup>4</sup> was  
4  
5 used, adjusting standard errors of the effect sizes in each study to account for the heterogeneity for intervention effects observed between  
6  
7 different studies.  
8  
9

10  
11 The pooled effect size of each meta-analysis was calculated by attributing a weight to the average effect size in each study according to sample  
12  
13 size. The z statistic was used to evaluate whether the pooled effect size was significantly different to no effect.  
14  
15

16  
17 Heterogeneity was quantified using the I<sup>2</sup> statistic.  
18  
19

### 20 **Composite measure calculation**

21  
22  
23 Composite scores were calculated where a study reported multiple outcomes falling within a particular outcome domain (e.g. objective  
24  
25 cognitive performance). This approach was pragmatic in allowing one score to represent each intervention in the meta-analysis regardless of  
26  
27 the number of outcomes reported. In turn this prevents more weight being given to studies with multiple outcomes.<sup>2</sup>The variance of the sum  
28  
29 of variables was calculated as described below.  
30  
31

32  
33 Using the example of a study with two relevant outcomes, there will be two effect sizes, namely  $y_1$  and  $y_2$ . The overall mean effect size for the  
34  
35 composite measure will be:  
36  
37

$$38 \bar{y} = 1/2(y_1 + y_2)$$

39  
40  
41  
42

1  
2  
3 The variance of this mean is calculated as follows:  
4  
5

$$6 \quad V_{\bar{y}} = \frac{1}{4} (V_{y_1} + V_{y_2} + 2r \sqrt{V_{y_1} V_{y_2}}),$$

7  
8

9 where r is the correlation coefficient describing to what extent  $y_1$  and  $y_2$  co-vary.  
10

11  
12 If the correlation is set at 0, the outcomes are essentially treated as independent of each other and if the correlation is set at 1, the variance is  
13 an average of each outcome's variance. The former will lead to an underestimate of the variance and overestimate of precision while the latter  
14 will have the opposite effect. Consequently, in the absence of existing literature to identify a suitable correlation, we reported composite  
15 effect sizes calculated using a correlation of 0.5.  
16  
17  
18  
19  
20  
21  
22  
23  
24  
25

- 26 1. Hedges LV, Olkin I. Statistical methods for meta-analysis. New York, Academic Press 1985.
  - 27 2. Borenstein M, Hedges LV, Higgins JPT, et al. Introduction to Meta-Analysis. Chichester, John Wiley & Sons, Ltd 2009.
  - 28 3. Morris S. Estimating Effect Sizes From Pretest-Posttest-Control Group Designs. Organ. Res. Meth 2008;11 (2):364-386.
  - 29 4. DerSimonian R, Laird N. Meta-analysis in clinical trials. Control Clin Trials 1986; 7(3):177-188
- 30  
31  
32  
33  
34  
35  
36  
37  
38  
39  
40  
41  
42  
43  
44  
45  
46

## PRISMA checklist

| Section/topic                    | Checklist item                                                                                                                                                                                                                                                                                              | Page number/<br>Figure/Table |
|----------------------------------|-------------------------------------------------------------------------------------------------------------------------------------------------------------------------------------------------------------------------------------------------------------------------------------------------------------|------------------------------|
| <b>Title</b>                     |                                                                                                                                                                                                                                                                                                             |                              |
| <b>Title</b>                     | Identify the report as a systematic review, meta-analysis, or both.                                                                                                                                                                                                                                         | <b>1</b>                     |
| <b>Abstract</b>                  |                                                                                                                                                                                                                                                                                                             |                              |
| <b>Structured summary</b>        | Provide a structured summary including, as applicable: background; objectives; data sources; study eligibility criteria, participants, and interventions; study appraisal and synthesis methods; results; limitations; conclusions and implications of key findings; systematic review registration number. | <b>2-3</b>                   |
| <b>Introduction</b>              |                                                                                                                                                                                                                                                                                                             |                              |
| <b>Rationale</b>                 | Describe the rationale for the review in the context of what is already known.                                                                                                                                                                                                                              | <b>4-6</b>                   |
| <b>Objectives</b>                | Provide an explicit statement of questions being addressed with reference to participants, interventions, comparisons, outcomes, and study design (PICOS).                                                                                                                                                  | <b>6</b>                     |
| <b>Methods</b>                   |                                                                                                                                                                                                                                                                                                             |                              |
| <b>Protocol and registration</b> | Indicate if a review protocol exists, if and where it can be accessed (e.g., Web address), and, if available, provide registration information including registration number.                                                                                                                               | <b>n/a</b>                   |
| <b>Eligibility criteria</b>      | Specify study characteristics (e.g., PICOS, length of follow-up) and report characteristics (e.g., years considered, language, publication status) used as criteria for eligibility, giving rationale.                                                                                                      | <b>8</b>                     |
| <b>Information sources</b>       | Describe all information sources (e.g., databases with dates of coverage, contact with study authors to identify additional studies) in the search and date last searched.                                                                                                                                  | <b>8</b>                     |
| <b>Search</b>                    | Present full electronic search strategy for at least one database, including any limits used, such that it could be repeated.                                                                                                                                                                               | <b>Supplementary</b>         |

| Section/topic                             | Checklist item                                                                                                                                                                                                         | Page number/<br>Figure/Table |
|-------------------------------------------|------------------------------------------------------------------------------------------------------------------------------------------------------------------------------------------------------------------------|------------------------------|
| <b>Table 1</b>                            |                                                                                                                                                                                                                        |                              |
| <b>Study selection</b>                    | State the process for selecting studies (i.e., screening, eligibility, included in systematic review, and, if applicable, included in the meta-analysis).                                                              | 9                            |
| <b>Data collection process</b>            | Describe method of data extraction from reports (e.g., piloted forms, independently, in duplicate) and any processes for obtaining and confirming data from investigators.                                             | 9                            |
| <b>Data items</b>                         | List and define all variables for which data were sought (e.g., PICOS, funding sources) and any assumptions and simplifications made.                                                                                  | n/a                          |
| <b>Risk of bias in individual studies</b> | Describe methods used for assessing risk of bias of individual studies (including specification of whether this was done at the study or outcome level), and how this information is to be used in any data synthesis. | 9                            |
| <b>Summary measures</b>                   | State the principal summary measures (e.g., risk ratio, difference in means).                                                                                                                                          | 9                            |
| <b>Synthesis of results</b>               | Describe the methods of handling data and combining results of studies, if done, including measures of consistency (e.g., $I^2$ ) for each meta-analysis.                                                              | 9                            |
| <b>Risk of bias across studies</b>        | Specify any assessment of risk of bias that may affect the cumulative evidence (e.g., publication bias, selective reporting within studies).                                                                           | 9                            |
| <b>Additional analyses</b>                | Describe methods of additional analyses (e.g., sensitivity or subgroup analyses, meta-regression), if done, indicating which were pre-specified.                                                                       | 10                           |
| <b>Results</b>                            |                                                                                                                                                                                                                        |                              |
| <b>Study selection</b>                    | Give numbers of studies screened, assessed for eligibility, and included in the review, with reasons for exclusions at each stage, ideally with a flow diagram.                                                        | Figure 1                     |

| Section/topic                        | Checklist item                                                                                                                                                                                           | Page number/<br>Figure/Table   |
|--------------------------------------|----------------------------------------------------------------------------------------------------------------------------------------------------------------------------------------------------------|--------------------------------|
| <b>Study characteristics</b>         | For each study, present characteristics for which data were extracted (e.g., study size, PICOS, follow-up period) and provide the citations.                                                             | <b>Table 1</b><br><b>11-12</b> |
| <b>Risk of bias within studies</b>   | Present data on risk of bias of each study and, if available, any outcome level assessment (see item 12).                                                                                                | <b>Supplementary Figure 1</b>  |
| <b>Results of individual studies</b> | For all outcomes considered (benefits or harms), present, for each study: (a) simple summary data for each intervention group (b) effect estimates and confidence intervals, ideally with a forest plot. | <b>Figs 2-3</b>                |
| <b>Synthesis of results</b>          | Present results of each meta-analysis done, including confidence intervals and measures of consistency.                                                                                                  | <b>13-14</b>                   |
| <b>Risk of bias across studies</b>   | Present results of any assessment of risk of bias across studies (see Item 15).                                                                                                                          | <b>Supplementary Figure 1</b>  |
| <b>Additional analysis</b>           | Give results of additional analyses, if done (e.g., sensitivity or subgroup analyses, meta-regression [see Item 16]).                                                                                    | <b>13-14</b>                   |
| <b>Discussion</b>                    |                                                                                                                                                                                                          |                                |
| <b>Summary of evidence</b>           | Summarize the main findings including the strength of evidence for each main outcome; consider their relevance to key groups (e.g., healthcare providers, users, and policy makers).                     | <b>16</b>                      |
| <b>Limitations</b>                   | Discuss limitations at study and outcome level (e.g., risk of bias), and at review-level (e.g., incomplete retrieval of identified research, reporting bias).                                            | <b>16-17</b>                   |
| <b>Conclusions</b>                   | Provide a general interpretation of the results in the context of other evidence, and implications for future research.                                                                                  | <b>19</b>                      |
| <b>Funding</b>                       |                                                                                                                                                                                                          |                                |
| <b>Funding</b>                       | <b>Describe sources of funding for the systematic review and other support (e.g., supply of data); role of funders for the</b>                                                                           | <b>n/a</b>                     |

| Section/topic | Checklist item            | Page number/<br>Figure/Table |
|---------------|---------------------------|------------------------------|
|               | <b>systematic review.</b> |                              |

For peer review only

The PRISMA for Abstracts Checklist

| TITLE                                     | CHECKLIST ITEM                                                                                                                                                                                       | REPORTED ON PAGE # |
|-------------------------------------------|------------------------------------------------------------------------------------------------------------------------------------------------------------------------------------------------------|--------------------|
| 1. Title:                                 | Identify the report as a systematic review, meta-analysis, or both.                                                                                                                                  | 3                  |
| <b>BACKGROUND</b>                         |                                                                                                                                                                                                      |                    |
| 2. Objectives:                            | The research question including components such as participants, interventions, comparators, and outcomes.                                                                                           | 3                  |
| <b>METHODS</b>                            |                                                                                                                                                                                                      |                    |
| 3. Eligibility criteria:                  | Study and report characteristics used as criteria for inclusion.                                                                                                                                     | 3                  |
| 4. Information sources:                   | Key databases searched and search dates.                                                                                                                                                             | 3                  |
| 5. Risk of bias:                          | Methods of assessing risk of bias.                                                                                                                                                                   | 3                  |
| <b>RESULTS</b>                            |                                                                                                                                                                                                      |                    |
| 6. Included studies:                      | Number and type of included studies and participants and relevant characteristics of studies.                                                                                                        | 3                  |
| 7. Synthesis of results:                  | Results for main outcomes (benefits and harms), preferably indicating the number of studies and participants for each. If meta-analysis was done, include summary measures and confidence intervals. | 3                  |
| 8. Description of the effect:             | Direction of the effect (i.e. which group is favoured) and size of the effect in terms meaningful to clinicians and patients.                                                                        | 3                  |
| <b>DISCUSSION</b>                         |                                                                                                                                                                                                      |                    |
| 9. Strengths and Limitations of evidence: | Brief summary of strengths and limitations of evidence (e.g. inconsistency, imprecision, indirectness, or risk of bias, other supporting or conflicting evidence)                                    | 3                  |
| 10. Interpretation:                       | General interpretation of the results and important implications                                                                                                                                     | 3                  |
| <b>OTHER</b>                              |                                                                                                                                                                                                      |                    |
| 11. Funding:                              | Primary source of funding for the review.                                                                                                                                                            | NA                 |
| 12. Registration:                         | Registration number and registry name.                                                                                                                                                               | NA                 |
